# Supplementary material for: Reliability of the use of foot pressure pain threshold in adults: a test-retest analysis
Source: PeerJ. 2025 Aug 12;13:e19875. doi: 10.7717/peerj.19875 (PMC12356193; doi:10.7717/peerj.19875)
Supplement: Supplemental Information 1 [file peerj-13-19875-s001.xlsx]

## Sheet: Hoja1
ID	Measurement	Repetition	PPT	Location	Laterality	Value	Date1and2	Date3	Aged	Height	Weight	BMI	Sex
1	M1	R1	Newton	1st MH	right	31.2	2023-09-21	2023-09-28	63.39	1.65	65	23.87	female
1	M1	R2	Newton	1st MH	right	23.3	2023-09-21	2023-09-28	63.39	1.65	65	23.87	female
1	M1	R3	Newton	1st MH	right	29.4	2023-09-21	2023-09-28	63.39	1.65	65	23.87	female
1	M1	R1	Newton	5th MH	right	22.8	2023-09-21	2023-09-28	63.39	1.65	65	23.87	female
1	M1	R2	Newton	5th MH	right	24.6	2023-09-21	2023-09-28	63.39	1.65	65	23.87	female
1	M1	R3	Newton	5th MH	right	22.4	2023-09-21	2023-09-28	63.39	1.65	65	23.87	female
1	M1	R1	Newton	Heel	right	42.2	2023-09-21	2023-09-28	63.39	1.65	65	23.87	female
1	M1	R2	Newton	Heel	right	42.2	2023-09-21	2023-09-28	63.39	1.65	65	23.87	female
1	M1	R3	Newton	Heel	right	40.4	2023-09-21	2023-09-28	63.39	1.65	65	23.87	female
1	M1	R1	Newton	1st TP	right	12.3	2023-09-21	2023-09-28	63.39	1.65	65	23.87	female
1	M1	R2	Newton	1st TP	right	12.7	2023-09-21	2023-09-28	63.39	1.65	65	23.87	female
1	M1	R3	Newton	1st TP	right	18.4	2023-09-21	2023-09-28	63.39	1.65	65	23.87	female
1	M1	R1	Newton	1st MH	left	38.2	2023-09-21	2023-09-28	63.39	1.65	65	23.87	female
1	M1	R2	Newton	1st MH	left	30.3	2023-09-21	2023-09-28	63.39	1.65	65	23.87	female
1	M1	R3	Newton	1st MH	left	27.7	2023-09-21	2023-09-28	63.39	1.65	65	23.87	female
1	M1	R1	Newton	5th MH	left	29.4	2023-09-21	2023-09-28	63.39	1.65	65	23.87	female
1	M1	R2	Newton	5th MH	left	24.2	2023-09-21	2023-09-28	63.39	1.65	65	23.87	female
1	M1	R3	Newton	5th MH	left	28.1	2023-09-21	2023-09-28	63.39	1.65	65	23.87	female
1	M1	R1	Newton	Heel	left	42.6	2023-09-21	2023-09-28	63.39	1.65	65	23.87	female
1	M1	R2	Newton	Heel	left	39.6	2023-09-21	2023-09-28	63.39	1.65	65	23.87	female
1	M1	R3	Newton	Heel	left	40	2023-09-21	2023-09-28	63.39	1.65	65	23.87	female
1	M1	R1	Newton	1st TP	left	11.4	2023-09-21	2023-09-28	63.39	1.65	65	23.87	female
1	M1	R2	Newton	1st TP	left	14	2023-09-21	2023-09-28	63.39	1.65	65	23.87	female
1	M1	R3	Newton	1st TP	left	13.6	2023-09-21	2023-09-28	63.39	1.65	65	23.87	female
1	M2	R1	Newton	1st MH	right	18.4	2023-09-21	2023-09-28	63.39	1.65	65	23.87	female
1	M2	R2	Newton	1st MH	right	19.8	2023-09-21	2023-09-28	63.39	1.65	65	23.87	female
1	M2	R3	Newton	1st MH	right	28.1	2023-09-21	2023-09-28	63.39	1.65	65	23.87	female
1	M2	R1	Newton	5th MH	right	26.4	2023-09-21	2023-09-28	63.39	1.65	65	23.87	female
1	M2	R2	Newton	5th MH	right	30.8	2023-09-21	2023-09-28	63.39	1.65	65	23.87	female
1	M2	R3	Newton	5th MH	right	30.3	2023-09-21	2023-09-28	63.39	1.65	65	23.87	female
1	M2	R1	Newton	Heel	right	35.6	2023-09-21	2023-09-28	63.39	1.65	65	23.87	female
1	M2	R2	Newton	Heel	right	54.1	2023-09-21	2023-09-28	63.39	1.65	65	23.87	female
1	M2	R3	Newton	Heel	right	50.1	2023-09-21	2023-09-28	63.39	1.65	65	23.87	female
1	M2	R1	Newton	1st TP	right	22.8	2023-09-21	2023-09-28	63.39	1.65	65	23.87	female
1	M2	R2	Newton	1st TP	right	26.4	2023-09-21	2023-09-28	63.39	1.65	65	23.87	female
1	M2	R3	Newton	1st TP	right	25	2023-09-21	2023-09-28	63.39	1.65	65	23.87	female
1	M2	R1	Newton	1st MH	left	21.5	2023-09-21	2023-09-28	63.39	1.65	65	23.87	female
1	M2	R2	Newton	1st MH	left	32.1	2023-09-21	2023-09-28	63.39	1.65	65	23.87	female
1	M2	R3	Newton	1st MH	left	28.6	2023-09-21	2023-09-28	63.39	1.65	65	23.87	female
1	M2	R1	Newton	5th MH	left	30.8	2023-09-21	2023-09-28	63.39	1.65	65	23.87	female
1	M2	R2	Newton	5th MH	left	34.7	2023-09-21	2023-09-28	63.39	1.65	65	23.87	female
1	M2	R3	Newton	5th MH	left	28.6	2023-09-21	2023-09-28	63.39	1.65	65	23.87	female
1	M2	R1	Newton	Heel	left	52.3	2023-09-21	2023-09-28	63.39	1.65	65	23.87	female
1	M2	R2	Newton	Heel	left	45.7	2023-09-21	2023-09-28	63.39	1.65	65	23.87	female
1	M2	R3	Newton	Heel	left	47.5	2023-09-21	2023-09-28	63.39	1.65	65	23.87	female
1	M2	R1	Newton	1st TP	left	29.4	2023-09-21	2023-09-28	63.39	1.65	65	23.87	female
1	M2	R2	Newton	1st TP	left	24.2	2023-09-21	2023-09-28	63.39	1.65	65	23.87	female
1	M2	R3	Newton	1st TP	left	26.4	2023-09-21	2023-09-28	63.39	1.65	65	23.87	female
1	M3	R1	Newton	1st MH	right	24.6	2023-09-21	2023-09-28	63.39	1.65	65	23.87	female
1	M3	R2	Newton	1st MH	right	24.6	2023-09-21	2023-09-28	63.39	1.65	65	23.87	female
1	M3	R3	Newton	1st MH	right	23.3	2023-09-21	2023-09-28	63.39	1.65	65	23.87	female
1	M3	R1	Newton	5th MH	right	33.8	2023-09-21	2023-09-28	63.39	1.65	65	23.87	female
1	M3	R2	Newton	5th MH	right	34.3	2023-09-21	2023-09-28	63.39	1.65	65	23.87	female
1	M3	R3	Newton	5th MH	right	31.6	2023-09-21	2023-09-28	63.39	1.65	65	23.87	female
1	M3	R1	Newton	Heel	right	49.2	2023-09-21	2023-09-28	63.39	1.65	65	23.87	female
1	M3	R2	Newton	Heel	right	46.6	2023-09-21	2023-09-28	63.39	1.65	65	23.87	female
1	M3	R3	Newton	Heel	right	47.5	2023-09-21	2023-09-28	63.39	1.65	65	23.87	female
1	M3	R1	Newton	1st TP	right	23.3	2023-09-21	2023-09-28	63.39	1.65	65	23.87	female
1	M3	R2	Newton	1st TP	right	27.7	2023-09-21	2023-09-28	63.39	1.65	65	23.87	female
1	M3	R3	Newton	1st TP	right	25	2023-09-21	2023-09-28	63.39	1.65	65	23.87	female
1	M3	R1	Newton	1st MH	left	25.5	2023-09-21	2023-09-28	63.39	1.65	65	23.87	female
1	M3	R2	Newton	1st MH	left	25	2023-09-21	2023-09-28	63.39	1.65	65	23.87	female
1	M3	R3	Newton	1st MH	left	24.6	2023-09-21	2023-09-28	63.39	1.65	65	23.87	female
1	M3	R1	Newton	5th MH	left	45.3	2023-09-21	2023-09-28	63.39	1.65	65	23.87	female
1	M3	R2	Newton	5th MH	left	35.6	2023-09-21	2023-09-28	63.39	1.65	65	23.87	female
1	M3	R3	Newton	5th MH	left	36.9	2023-09-21	2023-09-28	63.39	1.65	65	23.87	female
1	M3	R1	Newton	Heel	left	44.4	2023-09-21	2023-09-28	63.39	1.65	65	23.87	female
1	M3	R2	Newton	Heel	left	37.8	2023-09-21	2023-09-28	63.39	1.65	65	23.87	female
1	M3	R3	Newton	Heel	left	45.7	2023-09-21	2023-09-28	63.39	1.65	65	23.87	female
1	M3	R1	Newton	1st TP	left	28.1	2023-09-21	2023-09-28	63.39	1.65	65	23.87	female
1	M3	R2	Newton	1st TP	left	28.1	2023-09-21	2023-09-28	63.39	1.65	65	23.87	female
1	M3	R3	Newton	1st TP	left	28.1	2023-09-21	2023-09-28	63.39	1.65	65	23.87	female
2	M1	R1	Newton	1st MH	right	33.8	2023-09-21	2023-09-28	66.13	1.66	70	25.4	male
2	M1	R2	Newton	1st MH	right	52.3	2023-09-21	2023-09-28	66.13	1.66	70	25.4	male
2	M1	R3	Newton	1st MH	right	53.6	2023-09-21	2023-09-28	66.13	1.66	70	25.4	male
2	M1	R1	Newton	5th MH	right	46.2	2023-09-21	2023-09-28	66.13	1.66	70	25.4	male
2	M1	R2	Newton	5th MH	right	39.1	2023-09-21	2023-09-28	66.13	1.66	70	25.4	male
2	M1	R3	Newton	5th MH	right	43.5	2023-09-21	2023-09-28	66.13	1.66	70	25.4	male
2	M1	R1	Newton	Heel	right	61.1	2023-09-21	2023-09-28	66.13	1.66	70	25.4	male
2	M1	R2	Newton	Heel	right	68.2	2023-09-21	2023-09-28	66.13	1.66	70	25.4	male
2	M1	R3	Newton	Heel	right	68.6	2023-09-21	2023-09-28	66.13	1.66	70	25.4	male
2	M1	R1	Newton	1st TP	right	45.7	2023-09-21	2023-09-28	66.13	1.66	70	25.4	male
2	M1	R2	Newton	1st TP	right	43.5	2023-09-21	2023-09-28	66.13	1.66	70	25.4	male
2	M1	R3	Newton	1st TP	right	42.2	2023-09-21	2023-09-28	66.13	1.66	70	25.4	male
2	M1	R1	Newton	1st MH	left	49.2	2023-09-21	2023-09-28	66.13	1.66	70	25.4	male
2	M1	R2	Newton	1st MH	left	51.4	2023-09-21	2023-09-28	66.13	1.66	70	25.4	male
2	M1	R3	Newton	1st MH	left	52.8	2023-09-21	2023-09-28	66.13	1.66	70	25.4	male
2	M1	R1	Newton	5th MH	left	46.2	2023-09-21	2023-09-28	66.13	1.66	70	25.4	male
2	M1	R2	Newton	5th MH	left	41.3	2023-09-21	2023-09-28	66.13	1.66	70	25.4	male
2	M1	R3	Newton	5th MH	left	48.8	2023-09-21	2023-09-28	66.13	1.66	70	25.4	male
2	M1	R1	Newton	Heel	left	80	2023-09-21	2023-09-28	66.13	1.66	70	25.4	male
2	M1	R2	Newton	Heel	left	79.6	2023-09-21	2023-09-28	66.13	1.66	70	25.4	male
2	M1	R3	Newton	Heel	left	71.7	2023-09-21	2023-09-28	66.13	1.66	70	25.4	male
2	M1	R1	Newton	1st TP	left	44	2023-09-21	2023-09-28	66.13	1.66	70	25.4	male
2	M1	R2	Newton	1st TP	left	47	2023-09-21	2023-09-28	66.13	1.66	70	25.4	male
2	M1	R3	Newton	1st TP	left	40.9	2023-09-21	2023-09-28	66.13	1.66	70	25.4	male
2	M2	R1	Newton	1st MH	right	49.7	2023-09-21	2023-09-28	66.13	1.66	70	25.4	male
2	M2	R2	Newton	1st MH	right	49.7	2023-09-21	2023-09-28	66.13	1.66	70	25.4	male
2	M2	R3	Newton	1st MH	right	54.5	2023-09-21	2023-09-28	66.13	1.66	70	25.4	male
2	M2	R1	Newton	5th MH	right	62.4	2023-09-21	2023-09-28	66.13	1.66	70	25.4	male
2	M2	R2	Newton	5th MH	right	57.6	2023-09-21	2023-09-28	66.13	1.66	70	25.4	male
2	M2	R3	Newton	5th MH	right	59.8	2023-09-21	2023-09-28	66.13	1.66	70	25.4	male
2	M2	R1	Newton	Heel	right	70.8	2023-09-21	2023-09-28	66.13	1.66	70	25.4	male
2	M2	R2	Newton	Heel	right	80	2023-09-21	2023-09-28	66.13	1.66	70	25.4	male
2	M2	R3	Newton	Heel	right	79.6	2023-09-21	2023-09-28	66.13	1.66	70	25.4	male
2	M2	R1	Newton	1st TP	right	34.3	2023-09-21	2023-09-28	66.13	1.66	70	25.4	male
2	M2	R2	Newton	1st TP	right	44.4	2023-09-21	2023-09-28	66.13	1.66	70	25.4	male
2	M2	R3	Newton	1st TP	right	38.7	2023-09-21	2023-09-28	66.13	1.66	70	25.4	male
2	M2	R1	Newton	1st MH	left	55	2023-09-21	2023-09-28	66.13	1.66	70	25.4	male
2	M2	R2	Newton	1st MH	left	49.2	2023-09-21	2023-09-28	66.13	1.66	70	25.4	male
2	M2	R3	Newton	1st MH	left	44.4	2023-09-21	2023-09-28	66.13	1.66	70	25.4	male
2	M2	R1	Newton	5th MH	left	52.3	2023-09-21	2023-09-28	66.13	1.66	70	25.4	male
2	M2	R2	Newton	5th MH	left	56.7	2023-09-21	2023-09-28	66.13	1.66	70	25.4	male
2	M2	R3	Newton	5th MH	left	53.6	2023-09-21	2023-09-28	66.13	1.66	70	25.4	male
2	M2	R1	Newton	Heel	left	87.5	2023-09-21	2023-09-28	66.13	1.66	70	25.4	male
2	M2	R2	Newton	Heel	left	83.1	2023-09-21	2023-09-28	66.13	1.66	70	25.4	male
2	M2	R3	Newton	Heel	left	77	2023-09-21	2023-09-28	66.13	1.66	70	25.4	male
2	M2	R1	Newton	1st TP	left	44	2023-09-21	2023-09-28	66.13	1.66	70	25.4	male
2	M2	R2	Newton	1st TP	left	40.4	2023-09-21	2023-09-28	66.13	1.66	70	25.4	male
2	M2	R3	Newton	1st TP	left	38.2	2023-09-21	2023-09-28	66.13	1.66	70	25.4	male
2	M3	R1	Newton	1st MH	right	51.4	2023-09-21	2023-09-28	66.13	1.66	70	25.4	male
2	M3	R2	Newton	1st MH	right	48.8	2023-09-21	2023-09-28	66.13	1.66	70	25.4	male
2	M3	R3	Newton	1st MH	right	51.4	2023-09-21	2023-09-28	66.13	1.66	70	25.4	male
2	M3	R1	Newton	5th MH	right	72.1	2023-09-21	2023-09-28	66.13	1.66	70	25.4	male
2	M3	R2	Newton	5th MH	right	71.2	2023-09-21	2023-09-28	66.13	1.66	70	25.4	male
2	M3	R3	Newton	5th MH	right	60.7	2023-09-21	2023-09-28	66.13	1.66	70	25.4	male
2	M3	R1	Newton	Heel	right	85.2	2023-09-21	2023-09-28	66.13	1.66	70	25.4	male
2	M3	R2	Newton	Heel	right	74.3	2023-09-21	2023-09-28	66.13	1.66	70	25.4	male
2	M3	R3	Newton	Heel	right	91.5	2023-09-21	2023-09-28	66.13	1.66	70	25.4	male
2	M3	R1	Newton	1st TP	right	46.6	2023-09-21	2023-09-28	66.13	1.66	70	25.4	male
2	M3	R2	Newton	1st TP	right	47.9	2023-09-21	2023-09-28	66.13	1.66	70	25.4	male
2	M3	R3	Newton	1st TP	right	51.4	2023-09-21	2023-09-28	66.13	1.66	70	25.4	male
2	M3	R1	Newton	1st MH	left	50.1	2023-09-21	2023-09-28	66.13	1.66	70	25.4	male
2	M3	R2	Newton	1st MH	left	54.1	2023-09-21	2023-09-28	66.13	1.66	70	25.4	male
2	M3	R3	Newton	1st MH	left	59.4	2023-09-21	2023-09-28	66.13	1.66	70	25.4	male
2	M3	R1	Newton	5th MH	left	62	2023-09-21	2023-09-28	66.13	1.66	70	25.4	male
2	M3	R2	Newton	5th MH	left	62	2023-09-21	2023-09-28	66.13	1.66	70	25.4	male
2	M3	R3	Newton	5th MH	left	58	2023-09-21	2023-09-28	66.13	1.66	70	25.4	male
2	M3	R1	Newton	Heel	left	62.4	2023-09-21	2023-09-28	66.13	1.66	70	25.4	male
2	M3	R2	Newton	Heel	left	65.5	2023-09-21	2023-09-28	66.13	1.66	70	25.4	male
2	M3	R3	Newton	Heel	left	75.6	2023-09-21	2023-09-28	66.13	1.66	70	25.4	male
2	M3	R1	Newton	1st TP	left	44.4	2023-09-21	2023-09-28	66.13	1.66	70	25.4	male
2	M3	R2	Newton	1st TP	left	44.4	2023-09-21	2023-09-28	66.13	1.66	70	25.4	male
2	M3	R3	Newton	1st TP	left	49.7	2023-09-21	2023-09-28	66.13	1.66	70	25.4	male
4	M1	R1	Newton	1st MH	right	69	2023-09-21	2023-09-28	61.7	1.6	85	33.2	female
4	M1	R2	Newton	1st MH	right	52.3	2023-09-21	2023-09-28	61.7	1.6	85	33.2	female
4	M1	R3	Newton	1st MH	right	59.4	2023-09-21	2023-09-28	61.7	1.6	85	33.2	female
4	M1	R1	Newton	5th MH	right	56.3	2023-09-21	2023-09-28	61.7	1.6	85	33.2	female
4	M1	R2	Newton	5th MH	right	45.7	2023-09-21	2023-09-28	61.7	1.6	85	33.2	female
4	M1	R3	Newton	5th MH	right	58.9	2023-09-21	2023-09-28	61.7	1.6	85	33.2	female
4	M1	R1	Newton	Heel	right	55.8	2023-09-21	2023-09-28	61.7	1.6	85	33.2	female
4	M1	R2	Newton	Heel	right	66	2023-09-21	2023-09-28	61.7	1.6	85	33.2	female
4	M1	R3	Newton	Heel	right	62	2023-09-21	2023-09-28	61.7	1.6	85	33.2	female
4	M1	R1	Newton	1st TP	right	29	2023-09-21	2023-09-28	61.7	1.6	85	33.2	female
4	M1	R2	Newton	1st TP	right	34.3	2023-09-21	2023-09-28	61.7	1.6	85	33.2	female
4	M1	R3	Newton	1st TP	right	27.2	2023-09-21	2023-09-28	61.7	1.6	85	33.2	female
4	M1	R1	Newton	1st MH	left	51.4	2023-09-21	2023-09-28	61.7	1.6	85	33.2	female
4	M1	R2	Newton	1st MH	left	52.3	2023-09-21	2023-09-28	61.7	1.6	85	33.2	female
4	M1	R3	Newton	1st MH	left	57.6	2023-09-21	2023-09-28	61.7	1.6	85	33.2	female
4	M1	R1	Newton	5th MH	left	40.9	2023-09-21	2023-09-28	61.7	1.6	85	33.2	female
4	M1	R2	Newton	5th MH	left	41.3	2023-09-21	2023-09-28	61.7	1.6	85	33.2	female
4	M1	R3	Newton	5th MH	left	51.4	2023-09-21	2023-09-28	61.7	1.6	85	33.2	female
4	M1	R1	Newton	Heel	left	66.8	2023-09-21	2023-09-28	61.7	1.6	85	33.2	female
4	M1	R2	Newton	Heel	left	62	2023-09-21	2023-09-28	61.7	1.6	85	33.2	female
4	M1	R3	Newton	Heel	left	63.8	2023-09-21	2023-09-28	61.7	1.6	85	33.2	female
4	M1	R1	Newton	1st TP	left	31.6	2023-09-21	2023-09-28	61.7	1.6	85	33.2	female
4	M1	R2	Newton	1st TP	left	30.3	2023-09-21	2023-09-28	61.7	1.6	85	33.2	female
4	M1	R3	Newton	1st TP	left	26.4	2023-09-21	2023-09-28	61.7	1.6	85	33.2	female
4	M2	R1	Newton	1st MH	right	46.6	2023-09-21	2023-09-28	61.7	1.6	85	33.2	female
4	M2	R2	Newton	1st MH	right	57.2	2023-09-21	2023-09-28	61.7	1.6	85	33.2	female
4	M2	R3	Newton	1st MH	right	55.4	2023-09-21	2023-09-28	61.7	1.6	85	33.2	female
4	M2	R1	Newton	5th MH	right	43.5	2023-09-21	2023-09-28	61.7	1.6	85	33.2	female
4	M2	R2	Newton	5th MH	right	42.6	2023-09-21	2023-09-28	61.7	1.6	85	33.2	female
4	M2	R3	Newton	5th MH	right	39.6	2023-09-21	2023-09-28	61.7	1.6	85	33.2	female
4	M2	R1	Newton	Heel	right	51.4	2023-09-21	2023-09-28	61.7	1.6	85	33.2	female
4	M2	R2	Newton	Heel	right	53.2	2023-09-21	2023-09-28	61.7	1.6	85	33.2	female
4	M2	R3	Newton	Heel	right	48.8	2023-09-21	2023-09-28	61.7	1.6	85	33.2	female
4	M2	R1	Newton	1st TP	right	21.5	2023-09-21	2023-09-28	61.7	1.6	85	33.2	female
4	M2	R2	Newton	1st TP	right	31.2	2023-09-21	2023-09-28	61.7	1.6	85	33.2	female
4	M2	R3	Newton	1st TP	right	31.6	2023-09-21	2023-09-28	61.7	1.6	85	33.2	female
4	M2	R1	Newton	1st MH	left	53.6	2023-09-21	2023-09-28	61.7	1.6	85	33.2	female
4	M2	R2	Newton	1st MH	left	54.5	2023-09-21	2023-09-28	61.7	1.6	85	33.2	female
4	M2	R3	Newton	1st MH	left	48.8	2023-09-21	2023-09-28	61.7	1.6	85	33.2	female
4	M2	R1	Newton	5th MH	left	36.9	2023-09-21	2023-09-28	61.7	1.6	85	33.2	female
4	M2	R2	Newton	5th MH	left	34.7	2023-09-21	2023-09-28	61.7	1.6	85	33.2	female
4	M2	R3	Newton	5th MH	left	39.6	2023-09-21	2023-09-28	61.7	1.6	85	33.2	female
4	M2	R1	Newton	Heel	left	63.8	2023-09-21	2023-09-28	61.7	1.6	85	33.2	female
4	M2	R2	Newton	Heel	left	55.4	2023-09-21	2023-09-28	61.7	1.6	85	33.2	female
4	M2	R3	Newton	Heel	left	55	2023-09-21	2023-09-28	61.7	1.6	85	33.2	female
4	M2	R1	Newton	1st TP	left	29	2023-09-21	2023-09-28	61.7	1.6	85	33.2	female
4	M2	R2	Newton	1st TP	left	29.4	2023-09-21	2023-09-28	61.7	1.6	85	33.2	female
4	M2	R3	Newton	1st TP	left	32.5	2023-09-21	2023-09-28	61.7	1.6	85	33.2	female
4	M3	R1	Newton	1st MH	right	58.5	2023-09-21	2023-09-28	61.7	1.6	85	33.2	female
4	M3	R2	Newton	1st MH	right	62	2023-09-21	2023-09-28	61.7	1.6	85	33.2	female
4	M3	R3	Newton	1st MH	right	60.7	2023-09-21	2023-09-28	61.7	1.6	85	33.2	female
4	M3	R1	Newton	5th MH	right	62.4	2023-09-21	2023-09-28	61.7	1.6	85	33.2	female
4	M3	R2	Newton	5th MH	right	59.4	2023-09-21	2023-09-28	61.7	1.6	85	33.2	female
4	M3	R3	Newton	5th MH	right	55.4	2023-09-21	2023-09-28	61.7	1.6	85	33.2	female
4	M3	R1	Newton	Heel	right	61.1	2023-09-21	2023-09-28	61.7	1.6	85	33.2	female
4	M3	R2	Newton	Heel	right	53.2	2023-09-21	2023-09-28	61.7	1.6	85	33.2	female
4	M3	R3	Newton	Heel	right	63.3	2023-09-21	2023-09-28	61.7	1.6	85	33.2	female
4	M3	R1	Newton	1st TP	right	33.8	2023-09-21	2023-09-28	61.7	1.6	85	33.2	female
4	M3	R2	Newton	1st TP	right	33	2023-09-21	2023-09-28	61.7	1.6	85	33.2	female
4	M3	R3	Newton	1st TP	right	34.7	2023-09-21	2023-09-28	61.7	1.6	85	33.2	female
4	M3	R1	Newton	1st MH	left	67.3	2023-09-21	2023-09-28	61.7	1.6	85	33.2	female
4	M3	R2	Newton	1st MH	left	66.4	2023-09-21	2023-09-28	61.7	1.6	85	33.2	female
4	M3	R3	Newton	1st MH	left	62.4	2023-09-21	2023-09-28	61.7	1.6	85	33.2	female
4	M3	R1	Newton	5th MH	left	61.1	2023-09-21	2023-09-28	61.7	1.6	85	33.2	female
4	M3	R2	Newton	5th MH	left	65.1	2023-09-21	2023-09-28	61.7	1.6	85	33.2	female
4	M3	R3	Newton	5th MH	left	62.9	2023-09-21	2023-09-28	61.7	1.6	85	33.2	female
4	M3	R1	Newton	Heel	left	55	2023-09-21	2023-09-28	61.7	1.6	85	33.2	female
4	M3	R2	Newton	Heel	left	50.1	2023-09-21	2023-09-28	61.7	1.6	85	33.2	female
4	M3	R3	Newton	Heel	left	61.6	2023-09-21	2023-09-28	61.7	1.6	85	33.2	female
4	M3	R1	Newton	1st TP	left	36.9	2023-09-21	2023-09-28	61.7	1.6	85	33.2	female
4	M3	R2	Newton	1st TP	left	33.8	2023-09-21	2023-09-28	61.7	1.6	85	33.2	female
4	M3	R3	Newton	1st TP	left	33	2023-09-21	2023-09-28	61.7	1.6	85	33.2	female
5	M1	R1	Newton	1st MH	right	76.1	2023-09-22	2023-09-29	65.12	1.61	89	34.34	female
5	M1	R2	Newton	1st MH	right	66	2023-09-22	2023-09-29	65.12	1.61	89	34.34	female
5	M1	R3	Newton	1st MH	right	60.7	2023-09-22	2023-09-29	65.12	1.61	89	34.34	female
5	M1	R1	Newton	5th MH	right	57.2	2023-09-22	2023-09-29	65.12	1.61	89	34.34	female
5	M1	R2	Newton	5th MH	right	52.8	2023-09-22	2023-09-29	65.12	1.61	89	34.34	female
5	M1	R3	Newton	5th MH	right	55.8	2023-09-22	2023-09-29	65.12	1.61	89	34.34	female
5	M1	R1	Newton	Heel	right	110	2023-09-22	2023-09-29	65.12	1.61	89	34.34	female
5	M1	R2	Newton	Heel	right	110	2023-09-22	2023-09-29	65.12	1.61	89	34.34	female
5	M1	R3	Newton	Heel	right	110	2023-09-22	2023-09-29	65.12	1.61	89	34.34	female
5	M1	R1	Newton	1st TP	right	40	2023-09-22	2023-09-29	65.12	1.61	89	34.34	female
5	M1	R2	Newton	1st TP	right	40	2023-09-22	2023-09-29	65.12	1.61	89	34.34	female
5	M1	R3	Newton	1st TP	right	45.7	2023-09-22	2023-09-29	65.12	1.61	89	34.34	female
5	M1	R1	Newton	1st MH	left	63.8	2023-09-22	2023-09-29	65.12	1.61	89	34.34	female
5	M1	R2	Newton	1st MH	left	52.3	2023-09-22	2023-09-29	65.12	1.61	89	34.34	female
5	M1	R3	Newton	1st MH	left	47.5	2023-09-22	2023-09-29	65.12	1.61	89	34.34	female
5	M1	R1	Newton	5th MH	left	67.7	2023-09-22	2023-09-29	65.12	1.61	89	34.34	female
5	M1	R2	Newton	5th MH	left	63.3	2023-09-22	2023-09-29	65.12	1.61	89	34.34	female
5	M1	R3	Newton	5th MH	left	62.4	2023-09-22	2023-09-29	65.12	1.61	89	34.34	female
5	M1	R1	Newton	Heel	left	110	2023-09-22	2023-09-29	65.12	1.61	89	34.34	female
5	M1	R2	Newton	Heel	left	110	2023-09-22	2023-09-29	65.12	1.61	89	34.34	female
5	M1	R3	Newton	Heel	left	110	2023-09-22	2023-09-29	65.12	1.61	89	34.34	female
5	M1	R1	Newton	1st TP	left	50.1	2023-09-22	2023-09-29	65.12	1.61	89	34.34	female
5	M1	R2	Newton	1st TP	left	46.6	2023-09-22	2023-09-29	65.12	1.61	89	34.34	female
5	M1	R3	Newton	1st TP	left	47	2023-09-22	2023-09-29	65.12	1.61	89	34.34	female
5	M2	R1	Newton	1st MH	right	42.2	2023-09-22	2023-09-29	65.12	1.61	89	34.34	female
5	M2	R2	Newton	1st MH	right	60.2	2023-09-22	2023-09-29	65.12	1.61	89	34.34	female
5	M2	R3	Newton	1st MH	right	55.4	2023-09-22	2023-09-29	65.12	1.61	89	34.34	female
5	M2	R1	Newton	5th MH	right	47.5	2023-09-22	2023-09-29	65.12	1.61	89	34.34	female
5	M2	R2	Newton	5th MH	right	48.8	2023-09-22	2023-09-29	65.12	1.61	89	34.34	female
5	M2	R3	Newton	5th MH	right	55.8	2023-09-22	2023-09-29	65.12	1.61	89	34.34	female
5	M2	R1	Newton	Heel	right	110	2023-09-22	2023-09-29	65.12	1.61	89	34.34	female
5	M2	R2	Newton	Heel	right	110	2023-09-22	2023-09-29	65.12	1.61	89	34.34	female
5	M2	R3	Newton	Heel	right	110	2023-09-22	2023-09-29	65.12	1.61	89	34.34	female
5	M2	R1	Newton	1st TP	right	45.7	2023-09-22	2023-09-29	65.12	1.61	89	34.34	female
5	M2	R2	Newton	1st TP	right	48.4	2023-09-22	2023-09-29	65.12	1.61	89	34.34	female
5	M2	R3	Newton	1st TP	right	39.6	2023-09-22	2023-09-29	65.12	1.61	89	34.34	female
5	M2	R1	Newton	1st MH	left	47.9	2023-09-22	2023-09-29	65.12	1.61	89	34.34	female
5	M2	R2	Newton	1st MH	left	53.6	2023-09-22	2023-09-29	65.12	1.61	89	34.34	female
5	M2	R3	Newton	1st MH	left	45.3	2023-09-22	2023-09-29	65.12	1.61	89	34.34	female
5	M2	R1	Newton	5th MH	left	49.7	2023-09-22	2023-09-29	65.12	1.61	89	34.34	female
5	M2	R2	Newton	5th MH	left	58	2023-09-22	2023-09-29	65.12	1.61	89	34.34	female
5	M2	R3	Newton	5th MH	left	45.3	2023-09-22	2023-09-29	65.12	1.61	89	34.34	female
5	M2	R1	Newton	Heel	left	110	2023-09-22	2023-09-29	65.12	1.61	89	34.34	female
5	M2	R2	Newton	Heel	left	110	2023-09-22	2023-09-29	65.12	1.61	89	34.34	female
5	M2	R3	Newton	Heel	left	110	2023-09-22	2023-09-29	65.12	1.61	89	34.34	female
5	M2	R1	Newton	1st TP	left	51.4	2023-09-22	2023-09-29	65.12	1.61	89	34.34	female
5	M2	R2	Newton	1st TP	left	57.2	2023-09-22	2023-09-29	65.12	1.61	89	34.34	female
5	M2	R3	Newton	1st TP	left	54.1	2023-09-22	2023-09-29	65.12	1.61	89	34.34	female
5	M3	R1	Newton	1st MH	right	66.4	2023-09-22	2023-09-29	65.12	1.61	89	34.34	female
5	M3	R2	Newton	1st MH	right	72.6	2023-09-22	2023-09-29	65.12	1.61	89	34.34	female
5	M3	R3	Newton	1st MH	right	72.1	2023-09-22	2023-09-29	65.12	1.61	89	34.34	female
5	M3	R1	Newton	5th MH	right	76.1	2023-09-22	2023-09-29	65.12	1.61	89	34.34	female
5	M3	R2	Newton	5th MH	right	75.6	2023-09-22	2023-09-29	65.12	1.61	89	34.34	female
5	M3	R3	Newton	5th MH	right	72.6	2023-09-22	2023-09-29	65.12	1.61	89	34.34	female
5	M3	R1	Newton	Heel	right	110	2023-09-22	2023-09-29	65.12	1.61	89	34.34	female
5	M3	R2	Newton	Heel	right	110	2023-09-22	2023-09-29	65.12	1.61	89	34.34	female
5	M3	R3	Newton	Heel	right	110	2023-09-22	2023-09-29	65.12	1.61	89	34.34	female
5	M3	R1	Newton	1st TP	right	55.4	2023-09-22	2023-09-29	65.12	1.61	89	34.34	female
5	M3	R2	Newton	1st TP	right	52.8	2023-09-22	2023-09-29	65.12	1.61	89	34.34	female
5	M3	R3	Newton	1st TP	right	53.6	2023-09-22	2023-09-29	65.12	1.61	89	34.34	female
5	M3	R1	Newton	1st MH	left	54.5	2023-09-22	2023-09-29	65.12	1.61	89	34.34	female
5	M3	R2	Newton	1st MH	left	58.9	2023-09-22	2023-09-29	65.12	1.61	89	34.34	female
5	M3	R3	Newton	1st MH	left	57.6	2023-09-22	2023-09-29	65.12	1.61	89	34.34	female
5	M3	R1	Newton	5th MH	left	77.8	2023-09-22	2023-09-29	65.12	1.61	89	34.34	female
5	M3	R2	Newton	5th MH	left	69.5	2023-09-22	2023-09-29	65.12	1.61	89	34.34	female
5	M3	R3	Newton	5th MH	left	74.3	2023-09-22	2023-09-29	65.12	1.61	89	34.34	female
5	M3	R1	Newton	Heel	left	110	2023-09-22	2023-09-29	65.12	1.61	89	34.34	female
5	M3	R2	Newton	Heel	left	110	2023-09-22	2023-09-29	65.12	1.61	89	34.34	female
5	M3	R3	Newton	Heel	left	110	2023-09-22	2023-09-29	65.12	1.61	89	34.34	female
5	M3	R1	Newton	1st TP	left	56.3	2023-09-22	2023-09-29	65.12	1.61	89	34.34	female
5	M3	R2	Newton	1st TP	left	54.1	2023-09-22	2023-09-29	65.12	1.61	89	34.34	female
5	M3	R3	Newton	1st TP	left	55.8	2023-09-22	2023-09-29	65.12	1.61	89	34.34	female
6	M1	R1	Newton	1st MH	right	87.5	2023-09-22	2023-09-29	61.23	1.63	72	27.1	female
6	M1	R2	Newton	1st MH	right	84.4	2023-09-22	2023-09-29	61.23	1.63	72	27.1	female
6	M1	R3	Newton	1st MH	right	85.3	2023-09-22	2023-09-29	61.23	1.63	72	27.1	female
6	M1	R1	Newton	5th MH	right	74.3	2023-09-22	2023-09-29	61.23	1.63	72	27.1	female
6	M1	R2	Newton	5th MH	right	103	2023-09-22	2023-09-29	61.23	1.63	72	27.1	female
6	M1	R3	Newton	5th MH	right	91.9	2023-09-22	2023-09-29	61.23	1.63	72	27.1	female
6	M1	R1	Newton	Heel	right	110	2023-09-22	2023-09-29	61.23	1.63	72	27.1	female
6	M1	R2	Newton	Heel	right	110	2023-09-22	2023-09-29	61.23	1.63	72	27.1	female
6	M1	R3	Newton	Heel	right	110	2023-09-22	2023-09-29	61.23	1.63	72	27.1	female
6	M1	R1	Newton	1st TP	right	33.4	2023-09-22	2023-09-29	61.23	1.63	72	27.1	female
6	M1	R2	Newton	1st TP	right	32.5	2023-09-22	2023-09-29	61.23	1.63	72	27.1	female
6	M1	R3	Newton	1st TP	right	30.3	2023-09-22	2023-09-29	61.23	1.63	72	27.1	female
6	M1	R1	Newton	1st MH	left	110	2023-09-22	2023-09-29	61.23	1.63	72	27.1	female
6	M1	R2	Newton	1st MH	left	69.5	2023-09-22	2023-09-29	61.23	1.63	72	27.1	female
6	M1	R3	Newton	1st MH	left	74.3	2023-09-22	2023-09-29	61.23	1.63	72	27.1	female
6	M1	R1	Newton	5th MH	left	78.7	2023-09-22	2023-09-29	61.23	1.63	72	27.1	female
6	M1	R2	Newton	5th MH	left	64.6	2023-09-22	2023-09-29	61.23	1.63	72	27.1	female
6	M1	R3	Newton	5th MH	left	51.9	2023-09-22	2023-09-29	61.23	1.63	72	27.1	female
6	M1	R1	Newton	Heel	left	110	2023-09-22	2023-09-29	61.23	1.63	72	27.1	female
6	M1	R2	Newton	Heel	left	110	2023-09-22	2023-09-29	61.23	1.63	72	27.1	female
6	M1	R3	Newton	Heel	left	110	2023-09-22	2023-09-29	61.23	1.63	72	27.1	female
6	M1	R1	Newton	1st TP	left	42.6	2023-09-22	2023-09-29	61.23	1.63	72	27.1	female
6	M1	R2	Newton	1st TP	left	40.4	2023-09-22	2023-09-29	61.23	1.63	72	27.1	female
6	M1	R3	Newton	1st TP	left	32.5	2023-09-22	2023-09-29	61.23	1.63	72	27.1	female
6	M2	R1	Newton	1st MH	right	79.2	2023-09-22	2023-09-29	61.23	1.63	72	27.1	female
6	M2	R2	Newton	1st MH	right	81.8	2023-09-22	2023-09-29	61.23	1.63	72	27.1	female
6	M2	R3	Newton	1st MH	right	79.6	2023-09-22	2023-09-29	61.23	1.63	72	27.1	female
6	M2	R1	Newton	5th MH	right	57.2	2023-09-22	2023-09-29	61.23	1.63	72	27.1	female
6	M2	R2	Newton	5th MH	right	68.6	2023-09-22	2023-09-29	61.23	1.63	72	27.1	female
6	M2	R3	Newton	5th MH	right	69.9	2023-09-22	2023-09-29	61.23	1.63	72	27.1	female
6	M2	R1	Newton	Heel	right	110	2023-09-22	2023-09-29	61.23	1.63	72	27.1	female
6	M2	R2	Newton	Heel	right	110	2023-09-22	2023-09-29	61.23	1.63	72	27.1	female
6	M2	R3	Newton	Heel	right	110	2023-09-22	2023-09-29	61.23	1.63	72	27.1	female
6	M2	R1	Newton	1st TP	right	43.5	2023-09-22	2023-09-29	61.23	1.63	72	27.1	female
6	M2	R2	Newton	1st TP	right	49.7	2023-09-22	2023-09-29	61.23	1.63	72	27.1	female
6	M2	R3	Newton	1st TP	right	35.2	2023-09-22	2023-09-29	61.23	1.63	72	27.1	female
6	M2	R1	Newton	1st MH	left	62.9	2023-09-22	2023-09-29	61.23	1.63	72	27.1	female
6	M2	R2	Newton	1st MH	left	81.8	2023-09-22	2023-09-29	61.23	1.63	72	27.1	female
6	M2	R3	Newton	1st MH	left	88	2023-09-22	2023-09-29	61.23	1.63	72	27.1	female
6	M2	R1	Newton	5th MH	left	42.6	2023-09-22	2023-09-29	61.23	1.63	72	27.1	female
6	M2	R2	Newton	5th MH	left	68.2	2023-09-22	2023-09-29	61.23	1.63	72	27.1	female
6	M2	R3	Newton	5th MH	left	77.8	2023-09-22	2023-09-29	61.23	1.63	72	27.1	female
6	M2	R1	Newton	Heel	left	110	2023-09-22	2023-09-29	61.23	1.63	72	27.1	female
6	M2	R2	Newton	Heel	left	110	2023-09-22	2023-09-29	61.23	1.63	72	27.1	female
6	M2	R3	Newton	Heel	left	110	2023-09-22	2023-09-29	61.23	1.63	72	27.1	female
6	M2	R1	Newton	1st TP	left	45.3	2023-09-22	2023-09-29	61.23	1.63	72	27.1	female
6	M2	R2	Newton	1st TP	left	41.3	2023-09-22	2023-09-29	61.23	1.63	72	27.1	female
6	M2	R3	Newton	1st TP	left	40.9	2023-09-22	2023-09-29	61.23	1.63	72	27.1	female
6	M3	R1	Newton	1st MH	right	85.8	2023-09-22	2023-09-29	61.23	1.63	72	27.1	female
6	M3	R2	Newton	1st MH	right	85.3	2023-09-22	2023-09-29	61.23	1.63	72	27.1	female
6	M3	R3	Newton	1st MH	right	84.9	2023-09-22	2023-09-29	61.23	1.63	72	27.1	female
6	M3	R1	Newton	5th MH	right	72.1	2023-09-22	2023-09-29	61.23	1.63	72	27.1	female
6	M3	R2	Newton	5th MH	right	71.2	2023-09-22	2023-09-29	61.23	1.63	72	27.1	female
6	M3	R3	Newton	5th MH	right	78.2	2023-09-22	2023-09-29	61.23	1.63	72	27.1	female
6	M3	R1	Newton	Heel	right	110	2023-09-22	2023-09-29	61.23	1.63	72	27.1	female
6	M3	R2	Newton	Heel	right	110	2023-09-22	2023-09-29	61.23	1.63	72	27.1	female
6	M3	R3	Newton	Heel	right	110	2023-09-22	2023-09-29	61.23	1.63	72	27.1	female
6	M3	R1	Newton	1st TP	right	48.8	2023-09-22	2023-09-29	61.23	1.63	72	27.1	female
6	M3	R2	Newton	1st TP	right	39.1	2023-09-22	2023-09-29	61.23	1.63	72	27.1	female
6	M3	R3	Newton	1st TP	right	45.7	2023-09-22	2023-09-29	61.23	1.63	72	27.1	female
6	M3	R1	Newton	1st MH	left	79.6	2023-09-22	2023-09-29	61.23	1.63	72	27.1	female
6	M3	R2	Newton	1st MH	left	85.8	2023-09-22	2023-09-29	61.23	1.63	72	27.1	female
6	M3	R3	Newton	1st MH	left	77	2023-09-22	2023-09-29	61.23	1.63	72	27.1	female
6	M3	R1	Newton	5th MH	left	62.4	2023-09-22	2023-09-29	61.23	1.63	72	27.1	female
6	M3	R2	Newton	5th MH	left	77.4	2023-09-22	2023-09-29	61.23	1.63	72	27.1	female
6	M3	R3	Newton	5th MH	left	84.9	2023-09-22	2023-09-29	61.23	1.63	72	27.1	female
6	M3	R1	Newton	Heel	left	110	2023-09-22	2023-09-29	61.23	1.63	72	27.1	female
6	M3	R2	Newton	Heel	left	110	2023-09-22	2023-09-29	61.23	1.63	72	27.1	female
6	M3	R3	Newton	Heel	left	110	2023-09-22	2023-09-29	61.23	1.63	72	27.1	female
6	M3	R1	Newton	1st TP	left	47.9	2023-09-22	2023-09-29	61.23	1.63	72	27.1	female
6	M3	R2	Newton	1st TP	left	39.1	2023-09-22	2023-09-29	61.23	1.63	72	27.1	female
6	M3	R3	Newton	1st TP	left	41.3	2023-09-22	2023-09-29	61.23	1.63	72	27.1	female
7	M1	R1	Newton	1st MH	right	108	2023-09-22	2023-09-29	63.44	1.69	92	32.21	male
7	M1	R2	Newton	1st MH	right	96.8	2023-09-22	2023-09-29	63.44	1.69	92	32.21	male
7	M1	R3	Newton	1st MH	right	100	2023-09-22	2023-09-29	63.44	1.69	92	32.21	male
7	M1	R1	Newton	5th MH	right	96.8	2023-09-22	2023-09-29	63.44	1.69	92	32.21	male
7	M1	R2	Newton	5th MH	right	92.4	2023-09-22	2023-09-29	63.44	1.69	92	32.21	male
7	M1	R3	Newton	5th MH	right	103	2023-09-22	2023-09-29	63.44	1.69	92	32.21	male
7	M1	R1	Newton	Heel	right	110	2023-09-22	2023-09-29	63.44	1.69	92	32.21	male
7	M1	R2	Newton	Heel	right	110	2023-09-22	2023-09-29	63.44	1.69	92	32.21	male
7	M1	R3	Newton	Heel	right	110	2023-09-22	2023-09-29	63.44	1.69	92	32.21	male
7	M1	R1	Newton	1st TP	right	45.7	2023-09-22	2023-09-29	63.44	1.69	92	32.21	male
7	M1	R2	Newton	1st TP	right	44.4	2023-09-22	2023-09-29	63.44	1.69	92	32.21	male
7	M1	R3	Newton	1st TP	right	40.9	2023-09-22	2023-09-29	63.44	1.69	92	32.21	male
7	M1	R1	Newton	1st MH	left	104	2023-09-22	2023-09-29	63.44	1.69	92	32.21	male
7	M1	R2	Newton	1st MH	left	98.5	2023-09-22	2023-09-29	63.44	1.69	92	32.21	male
7	M1	R3	Newton	1st MH	left	98.1	2023-09-22	2023-09-29	63.44	1.69	92	32.21	male
7	M1	R1	Newton	5th MH	left	101	2023-09-22	2023-09-29	63.44	1.69	92	32.21	male
7	M1	R2	Newton	5th MH	left	86.6	2023-09-22	2023-09-29	63.44	1.69	92	32.21	male
7	M1	R3	Newton	5th MH	left	84.4	2023-09-22	2023-09-29	63.44	1.69	92	32.21	male
7	M1	R1	Newton	Heel	left	110	2023-09-22	2023-09-29	63.44	1.69	92	32.21	male
7	M1	R2	Newton	Heel	left	110	2023-09-22	2023-09-29	63.44	1.69	92	32.21	male
7	M1	R3	Newton	Heel	left	110	2023-09-22	2023-09-29	63.44	1.69	92	32.21	male
7	M1	R1	Newton	1st TP	left	48.8	2023-09-22	2023-09-29	63.44	1.69	92	32.21	male
7	M1	R2	Newton	1st TP	left	49.2	2023-09-22	2023-09-29	63.44	1.69	92	32.21	male
7	M1	R3	Newton	1st TP	left	54.5	2023-09-22	2023-09-29	63.44	1.69	92	32.21	male
7	M2	R1	Newton	1st MH	right	76.1	2023-09-22	2023-09-29	63.44	1.69	92	32.21	male
7	M2	R2	Newton	1st MH	right	86.2	2023-09-22	2023-09-29	63.44	1.69	92	32.21	male
7	M2	R3	Newton	1st MH	right	83.1	2023-09-22	2023-09-29	63.44	1.69	92	32.21	male
7	M2	R1	Newton	5th MH	right	76.1	2023-09-22	2023-09-29	63.44	1.69	92	32.21	male
7	M2	R2	Newton	5th MH	right	91	2023-09-22	2023-09-29	63.44	1.69	92	32.21	male
7	M2	R3	Newton	5th MH	right	97.2	2023-09-22	2023-09-29	63.44	1.69	92	32.21	male
7	M2	R1	Newton	Heel	right	110	2023-09-22	2023-09-29	63.44	1.69	92	32.21	male
7	M2	R2	Newton	Heel	right	110	2023-09-22	2023-09-29	63.44	1.69	92	32.21	male
7	M2	R3	Newton	Heel	right	110	2023-09-22	2023-09-29	63.44	1.69	92	32.21	male
7	M2	R1	Newton	1st TP	right	56.7	2023-09-22	2023-09-29	63.44	1.69	92	32.21	male
7	M2	R2	Newton	1st TP	right	57.2	2023-09-22	2023-09-29	63.44	1.69	92	32.21	male
7	M2	R3	Newton	1st TP	right	51.9	2023-09-22	2023-09-29	63.44	1.69	92	32.21	male
7	M2	R1	Newton	1st MH	left	76.1	2023-09-22	2023-09-29	63.44	1.69	92	32.21	male
7	M2	R2	Newton	1st MH	left	86.2	2023-09-22	2023-09-29	63.44	1.69	92	32.21	male
7	M2	R3	Newton	1st MH	left	80.5	2023-09-22	2023-09-29	63.44	1.69	92	32.21	male
7	M2	R1	Newton	5th MH	left	88.4	2023-09-22	2023-09-29	63.44	1.69	92	32.21	male
7	M2	R2	Newton	5th MH	left	88.4	2023-09-22	2023-09-29	63.44	1.69	92	32.21	male
7	M2	R3	Newton	5th MH	left	75.2	2023-09-22	2023-09-29	63.44	1.69	92	32.21	male
7	M2	R1	Newton	Heel	left	110	2023-09-22	2023-09-29	63.44	1.69	92	32.21	male
7	M2	R2	Newton	Heel	left	110	2023-09-22	2023-09-29	63.44	1.69	92	32.21	male
7	M2	R3	Newton	Heel	left	110	2023-09-22	2023-09-29	63.44	1.69	92	32.21	male
7	M2	R1	Newton	1st TP	left	56.3	2023-09-22	2023-09-29	63.44	1.69	92	32.21	male
7	M2	R2	Newton	1st TP	left	53.6	2023-09-22	2023-09-29	63.44	1.69	92	32.21	male
7	M2	R3	Newton	1st TP	left	54.1	2023-09-22	2023-09-29	63.44	1.69	92	32.21	male
7	M3	R1	Newton	1st MH	right	88.8	2023-09-22	2023-09-29	63.44	1.69	92	32.21	male
7	M3	R2	Newton	1st MH	right	77.8	2023-09-22	2023-09-29	63.44	1.69	92	32.21	male
7	M3	R3	Newton	1st MH	right	85.8	2023-09-22	2023-09-29	63.44	1.69	92	32.21	male
7	M3	R1	Newton	5th MH	right	72.6	2023-09-22	2023-09-29	63.44	1.69	92	32.21	male
7	M3	R2	Newton	5th MH	right	77	2023-09-22	2023-09-29	63.44	1.69	92	32.21	male
7	M3	R3	Newton	5th MH	right	77.8	2023-09-22	2023-09-29	63.44	1.69	92	32.21	male
7	M3	R1	Newton	Heel	right	110	2023-09-22	2023-09-29	63.44	1.69	92	32.21	male
7	M3	R2	Newton	Heel	right	110	2023-09-22	2023-09-29	63.44	1.69	92	32.21	male
7	M3	R3	Newton	Heel	right	110	2023-09-22	2023-09-29	63.44	1.69	92	32.21	male
7	M3	R1	Newton	1st TP	right	53.2	2023-09-22	2023-09-29	63.44	1.69	92	32.21	male
7	M3	R2	Newton	1st TP	right	50.6	2023-09-22	2023-09-29	63.44	1.69	92	32.21	male
7	M3	R3	Newton	1st TP	right	50.6	2023-09-22	2023-09-29	63.44	1.69	92	32.21	male
7	M3	R1	Newton	1st MH	left	89.7	2023-09-22	2023-09-29	63.44	1.69	92	32.21	male
7	M3	R2	Newton	1st MH	left	104	2023-09-22	2023-09-29	63.44	1.69	92	32.21	male
7	M3	R3	Newton	1st MH	left	91	2023-09-22	2023-09-29	63.44	1.69	92	32.21	male
7	M3	R1	Newton	5th MH	left	95.4	2023-09-22	2023-09-29	63.44	1.69	92	32.21	male
7	M3	R2	Newton	5th MH	left	84.4	2023-09-22	2023-09-29	63.44	1.69	92	32.21	male
7	M3	R3	Newton	5th MH	left	82.7	2023-09-22	2023-09-29	63.44	1.69	92	32.21	male
7	M3	R1	Newton	Heel	left	110	2023-09-22	2023-09-29	63.44	1.69	92	32.21	male
7	M3	R2	Newton	Heel	left	110	2023-09-22	2023-09-29	63.44	1.69	92	32.21	male
7	M3	R3	Newton	Heel	left	110	2023-09-22	2023-09-29	63.44	1.69	92	32.21	male
7	M3	R1	Newton	1st TP	left	49.7	2023-09-22	2023-09-29	63.44	1.69	92	32.21	male
7	M3	R2	Newton	1st TP	left	50.6	2023-09-22	2023-09-29	63.44	1.69	92	32.21	male
7	M3	R3	Newton	1st TP	left	57.2	2023-09-22	2023-09-29	63.44	1.69	92	32.21	male
8	M1	R1	Newton	1st MH	right	45.7	2023-09-22	2023-09-29	65.48	1.69	79	27.66	male
8	M1	R2	Newton	1st MH	right	75.2	2023-09-22	2023-09-29	65.48	1.69	79	27.66	male
8	M1	R3	Newton	1st MH	right	83.6	2023-09-22	2023-09-29	65.48	1.69	79	27.66	male
8	M1	R1	Newton	5th MH	right	91	2023-09-22	2023-09-29	65.48	1.69	79	27.66	male
8	M1	R2	Newton	5th MH	right	82.2	2023-09-22	2023-09-29	65.48	1.69	79	27.66	male
8	M1	R3	Newton	5th MH	right	94.1	2023-09-22	2023-09-29	65.48	1.69	79	27.66	male
8	M1	R1	Newton	Heel	right	110	2023-09-22	2023-09-29	65.48	1.69	79	27.66	male
8	M1	R2	Newton	Heel	right	110	2023-09-22	2023-09-29	65.48	1.69	79	27.66	male
8	M1	R3	Newton	Heel	right	110	2023-09-22	2023-09-29	65.48	1.69	79	27.66	male
8	M1	R1	Newton	1st TP	right	79.2	2023-09-22	2023-09-29	65.48	1.69	79	27.66	male
8	M1	R2	Newton	1st TP	right	76.1	2023-09-22	2023-09-29	65.48	1.69	79	27.66	male
8	M1	R3	Newton	1st TP	right	80	2023-09-22	2023-09-29	65.48	1.69	79	27.66	male
8	M1	R1	Newton	1st MH	left	77	2023-09-22	2023-09-29	65.48	1.69	79	27.66	male
8	M1	R2	Newton	1st MH	left	74.8	2023-09-22	2023-09-29	65.48	1.69	79	27.66	male
8	M1	R3	Newton	1st MH	left	98.5	2023-09-22	2023-09-29	65.48	1.69	79	27.66	male
8	M1	R1	Newton	5th MH	left	96.8	2023-09-22	2023-09-29	65.48	1.69	79	27.66	male
8	M1	R2	Newton	5th MH	left	110	2023-09-22	2023-09-29	65.48	1.69	79	27.66	male
8	M1	R3	Newton	5th MH	left	100	2023-09-22	2023-09-29	65.48	1.69	79	27.66	male
8	M1	R1	Newton	Heel	left	110	2023-09-22	2023-09-29	65.48	1.69	79	27.66	male
8	M1	R2	Newton	Heel	left	110	2023-09-22	2023-09-29	65.48	1.69	79	27.66	male
8	M1	R3	Newton	Heel	left	110	2023-09-22	2023-09-29	65.48	1.69	79	27.66	male
8	M1	R1	Newton	1st TP	left	86.6	2023-09-22	2023-09-29	65.48	1.69	79	27.66	male
8	M1	R2	Newton	1st TP	left	89.3	2023-09-22	2023-09-29	65.48	1.69	79	27.66	male
8	M1	R3	Newton	1st TP	left	80.9	2023-09-22	2023-09-29	65.48	1.69	79	27.66	male
8	M2	R1	Newton	1st MH	right	110	2023-09-22	2023-09-29	65.48	1.69	79	27.66	male
8	M2	R2	Newton	1st MH	right	110	2023-09-22	2023-09-29	65.48	1.69	79	27.66	male
8	M2	R3	Newton	1st MH	right	110	2023-09-22	2023-09-29	65.48	1.69	79	27.66	male
8	M2	R1	Newton	5th MH	right	102	2023-09-22	2023-09-29	65.48	1.69	79	27.66	male
8	M2	R2	Newton	5th MH	right	110	2023-09-22	2023-09-29	65.48	1.69	79	27.66	male
8	M2	R3	Newton	5th MH	right	110	2023-09-22	2023-09-29	65.48	1.69	79	27.66	male
8	M2	R1	Newton	Heel	right	110	2023-09-22	2023-09-29	65.48	1.69	79	27.66	male
8	M2	R2	Newton	Heel	right	110	2023-09-22	2023-09-29	65.48	1.69	79	27.66	male
8	M2	R3	Newton	Heel	right	110	2023-09-22	2023-09-29	65.48	1.69	79	27.66	male
8	M2	R1	Newton	1st TP	right	70.4	2023-09-22	2023-09-29	65.48	1.69	79	27.66	male
8	M2	R2	Newton	1st TP	right	81.4	2023-09-22	2023-09-29	65.48	1.69	79	27.66	male
8	M2	R3	Newton	1st TP	right	78.7	2023-09-22	2023-09-29	65.48	1.69	79	27.66	male
8	M2	R1	Newton	1st MH	left	110	2023-09-22	2023-09-29	65.48	1.69	79	27.66	male
8	M2	R2	Newton	1st MH	left	110	2023-09-22	2023-09-29	65.48	1.69	79	27.66	male
8	M2	R3	Newton	1st MH	left	110	2023-09-22	2023-09-29	65.48	1.69	79	27.66	male
8	M2	R1	Newton	5th MH	left	110	2023-09-22	2023-09-29	65.48	1.69	79	27.66	male
8	M2	R2	Newton	5th MH	left	110	2023-09-22	2023-09-29	65.48	1.69	79	27.66	male
8	M2	R3	Newton	5th MH	left	103	2023-09-22	2023-09-29	65.48	1.69	79	27.66	male
8	M2	R1	Newton	Heel	left	110	2023-09-22	2023-09-29	65.48	1.69	79	27.66	male
8	M2	R2	Newton	Heel	left	110	2023-09-22	2023-09-29	65.48	1.69	79	27.66	male
8	M2	R3	Newton	Heel	left	110	2023-09-22	2023-09-29	65.48	1.69	79	27.66	male
8	M2	R1	Newton	1st TP	left	86.6	2023-09-22	2023-09-29	65.48	1.69	79	27.66	male
8	M2	R2	Newton	1st TP	left	76.5	2023-09-22	2023-09-29	65.48	1.69	79	27.66	male
8	M2	R3	Newton	1st TP	left	67.7	2023-09-22	2023-09-29	65.48	1.69	79	27.66	male
8	M3	R1	Newton	1st MH	right	86.6	2023-09-22	2023-09-29	65.48	1.69	79	27.66	male
8	M3	R2	Newton	1st MH	right	95	2023-09-22	2023-09-29	65.48	1.69	79	27.66	male
8	M3	R3	Newton	1st MH	right	101	2023-09-22	2023-09-29	65.48	1.69	79	27.66	male
8	M3	R1	Newton	5th MH	right	104	2023-09-22	2023-09-29	65.48	1.69	79	27.66	male
8	M3	R2	Newton	5th MH	right	107	2023-09-22	2023-09-29	65.48	1.69	79	27.66	male
8	M3	R3	Newton	5th MH	right	101	2023-09-22	2023-09-29	65.48	1.69	79	27.66	male
8	M3	R1	Newton	Heel	right	110	2023-09-22	2023-09-29	65.48	1.69	79	27.66	male
8	M3	R2	Newton	Heel	right	110	2023-09-22	2023-09-29	65.48	1.69	79	27.66	male
8	M3	R3	Newton	Heel	right	110	2023-09-22	2023-09-29	65.48	1.69	79	27.66	male
8	M3	R1	Newton	1st TP	right	86.2	2023-09-22	2023-09-29	65.48	1.69	79	27.66	male
8	M3	R2	Newton	1st TP	right	84	2023-09-22	2023-09-29	65.48	1.69	79	27.66	male
8	M3	R3	Newton	1st TP	right	85.3	2023-09-22	2023-09-29	65.48	1.69	79	27.66	male
8	M3	R1	Newton	1st MH	left	93.7	2023-09-22	2023-09-29	65.48	1.69	79	27.66	male
8	M3	R2	Newton	1st MH	left	96.8	2023-09-22	2023-09-29	65.48	1.69	79	27.66	male
8	M3	R3	Newton	1st MH	left	99.4	2023-09-22	2023-09-29	65.48	1.69	79	27.66	male
8	M3	R1	Newton	5th MH	left	110	2023-09-22	2023-09-29	65.48	1.69	79	27.66	male
8	M3	R2	Newton	5th MH	left	110	2023-09-22	2023-09-29	65.48	1.69	79	27.66	male
8	M3	R3	Newton	5th MH	left	104	2023-09-22	2023-09-29	65.48	1.69	79	27.66	male
8	M3	R1	Newton	Heel	left	110	2023-09-22	2023-09-29	65.48	1.69	79	27.66	male
8	M3	R2	Newton	Heel	left	110	2023-09-22	2023-09-29	65.48	1.69	79	27.66	male
8	M3	R3	Newton	Heel	left	110	2023-09-22	2023-09-29	65.48	1.69	79	27.66	male
8	M3	R1	Newton	1st TP	left	84	2023-09-22	2023-09-29	65.48	1.69	79	27.66	male
8	M3	R2	Newton	1st TP	left	87.1	2023-09-22	2023-09-29	65.48	1.69	79	27.66	male
8	M3	R3	Newton	1st TP	left	81.8	2023-09-22	2023-09-29	65.48	1.69	79	27.66	male
9	M1	R1	Newton	1st MH	right	79.2	2023-09-22	2023-09-29	61.81	1.69	73	25.55	female
9	M1	R2	Newton	1st MH	right	88.4	2023-09-22	2023-09-29	61.81	1.69	73	25.55	female
9	M1	R3	Newton	1st MH	right	77.8	2023-09-22	2023-09-29	61.81	1.69	73	25.55	female
9	M1	R1	Newton	5th MH	right	110	2023-09-22	2023-09-29	61.81	1.69	73	25.55	female
9	M1	R2	Newton	5th MH	right	89.3	2023-09-22	2023-09-29	61.81	1.69	73	25.55	female
9	M1	R3	Newton	5th MH	right	97.2	2023-09-22	2023-09-29	61.81	1.69	73	25.55	female
9	M1	R1	Newton	Heel	right	110	2023-09-22	2023-09-29	61.81	1.69	73	25.55	female
9	M1	R2	Newton	Heel	right	110	2023-09-22	2023-09-29	61.81	1.69	73	25.55	female
9	M1	R3	Newton	Heel	right	110	2023-09-22	2023-09-29	61.81	1.69	73	25.55	female
9	M1	R1	Newton	1st TP	right	47	2023-09-22	2023-09-29	61.81	1.69	73	25.55	female
9	M1	R2	Newton	1st TP	right	50.6	2023-09-22	2023-09-29	61.81	1.69	73	25.55	female
9	M1	R3	Newton	1st TP	right	45.3	2023-09-22	2023-09-29	61.81	1.69	73	25.55	female
9	M1	R1	Newton	1st MH	left	64.6	2023-09-22	2023-09-29	61.81	1.69	73	25.55	female
9	M1	R2	Newton	1st MH	left	84.9	2023-09-22	2023-09-29	61.81	1.69	73	25.55	female
9	M1	R3	Newton	1st MH	left	74.8	2023-09-22	2023-09-29	61.81	1.69	73	25.55	female
9	M1	R1	Newton	5th MH	left	78.3	2023-09-22	2023-09-29	61.81	1.69	73	25.55	female
9	M1	R2	Newton	5th MH	left	81.8	2023-09-22	2023-09-29	61.81	1.69	73	25.55	female
9	M1	R3	Newton	5th MH	left	98.5	2023-09-22	2023-09-29	61.81	1.69	73	25.55	female
9	M1	R1	Newton	Heel	left	110	2023-09-22	2023-09-29	61.81	1.69	73	25.55	female
9	M1	R2	Newton	Heel	left	110	2023-09-22	2023-09-29	61.81	1.69	73	25.55	female
9	M1	R3	Newton	Heel	left	110	2023-09-22	2023-09-29	61.81	1.69	73	25.55	female
9	M1	R1	Newton	1st TP	left	42.6	2023-09-22	2023-09-29	61.81	1.69	73	25.55	female
9	M1	R2	Newton	1st TP	left	47.5	2023-09-22	2023-09-29	61.81	1.69	73	25.55	female
9	M1	R3	Newton	1st TP	left	51.4	2023-09-22	2023-09-29	61.81	1.69	73	25.55	female
9	M2	R1	Newton	1st MH	right	58	2023-09-22	2023-09-29	61.81	1.69	73	25.55	female
9	M2	R2	Newton	1st MH	right	68.2	2023-09-22	2023-09-29	61.81	1.69	73	25.55	female
9	M2	R3	Newton	1st MH	right	80.5	2023-09-22	2023-09-29	61.81	1.69	73	25.55	female
9	M2	R1	Newton	5th MH	right	66.4	2023-09-22	2023-09-29	61.81	1.69	73	25.55	female
9	M2	R2	Newton	5th MH	right	55.4	2023-09-22	2023-09-29	61.81	1.69	73	25.55	female
9	M2	R3	Newton	5th MH	right	73	2023-09-22	2023-09-29	61.81	1.69	73	25.55	female
9	M2	R1	Newton	Heel	right	110	2023-09-22	2023-09-29	61.81	1.69	73	25.55	female
9	M2	R2	Newton	Heel	right	110	2023-09-22	2023-09-29	61.81	1.69	73	25.55	female
9	M2	R3	Newton	Heel	right	109	2023-09-22	2023-09-29	61.81	1.69	73	25.55	female
9	M2	R1	Newton	1st TP	right	43.5	2023-09-22	2023-09-29	61.81	1.69	73	25.55	female
9	M2	R2	Newton	1st TP	right	38.7	2023-09-22	2023-09-29	61.81	1.69	73	25.55	female
9	M2	R3	Newton	1st TP	right	40.9	2023-09-22	2023-09-29	61.81	1.69	73	25.55	female
9	M2	R1	Newton	1st MH	left	51	2023-09-22	2023-09-29	61.81	1.69	73	25.55	female
9	M2	R2	Newton	1st MH	left	62.4	2023-09-22	2023-09-29	61.81	1.69	73	25.55	female
9	M2	R3	Newton	1st MH	left	60.7	2023-09-22	2023-09-29	61.81	1.69	73	25.55	female
9	M2	R1	Newton	5th MH	left	64.6	2023-09-22	2023-09-29	61.81	1.69	73	25.55	female
9	M2	R2	Newton	5th MH	left	48.4	2023-09-22	2023-09-29	61.81	1.69	73	25.55	female
9	M2	R3	Newton	5th MH	left	58	2023-09-22	2023-09-29	61.81	1.69	73	25.55	female
9	M2	R1	Newton	Heel	left	110	2023-09-22	2023-09-29	61.81	1.69	73	25.55	female
9	M2	R2	Newton	Heel	left	101	2023-09-22	2023-09-29	61.81	1.69	73	25.55	female
9	M2	R3	Newton	Heel	left	97.2	2023-09-22	2023-09-29	61.81	1.69	73	25.55	female
9	M2	R1	Newton	1st TP	left	44.8	2023-09-22	2023-09-29	61.81	1.69	73	25.55	female
9	M2	R2	Newton	1st TP	left	29	2023-09-22	2023-09-29	61.81	1.69	73	25.55	female
9	M2	R3	Newton	1st TP	left	37.8	2023-09-22	2023-09-29	61.81	1.69	73	25.55	female
9	M3	R1	Newton	1st MH	right	82.7	2023-09-22	2023-09-29	61.81	1.69	73	25.55	female
9	M3	R2	Newton	1st MH	right	78.2	2023-09-22	2023-09-29	61.81	1.69	73	25.55	female
9	M3	R3	Newton	1st MH	right	86.2	2023-09-22	2023-09-29	61.81	1.69	73	25.55	female
9	M3	R1	Newton	5th MH	right	88.1	2023-09-22	2023-09-29	61.81	1.69	73	25.55	female
9	M3	R2	Newton	5th MH	right	82.2	2023-09-22	2023-09-29	61.81	1.69	73	25.55	female
9	M3	R3	Newton	5th MH	right	77	2023-09-22	2023-09-29	61.81	1.69	73	25.55	female
9	M3	R1	Newton	Heel	right	110	2023-09-22	2023-09-29	61.81	1.69	73	25.55	female
9	M3	R2	Newton	Heel	right	105	2023-09-22	2023-09-29	61.81	1.69	73	25.55	female
9	M3	R3	Newton	Heel	right	97.6	2023-09-22	2023-09-29	61.81	1.69	73	25.55	female
9	M3	R1	Newton	1st TP	right	42.2	2023-09-22	2023-09-29	61.81	1.69	73	25.55	female
9	M3	R2	Newton	1st TP	right	45.3	2023-09-22	2023-09-29	61.81	1.69	73	25.55	female
9	M3	R3	Newton	1st TP	right	52.8	2023-09-22	2023-09-29	61.81	1.69	73	25.55	female
9	M3	R1	Newton	1st MH	left	87.1	2023-09-22	2023-09-29	61.81	1.69	73	25.55	female
9	M3	R2	Newton	1st MH	left	86.2	2023-09-22	2023-09-29	61.81	1.69	73	25.55	female
9	M3	R3	Newton	1st MH	left	82.7	2023-09-22	2023-09-29	61.81	1.69	73	25.55	female
9	M3	R1	Newton	5th MH	left	66.4	2023-09-22	2023-09-29	61.81	1.69	73	25.55	female
9	M3	R2	Newton	5th MH	left	73	2023-09-22	2023-09-29	61.81	1.69	73	25.55	female
9	M3	R3	Newton	5th MH	left	77	2023-09-22	2023-09-29	61.81	1.69	73	25.55	female
9	M3	R1	Newton	Heel	left	107	2023-09-22	2023-09-29	61.81	1.69	73	25.55	female
9	M3	R2	Newton	Heel	left	110	2023-09-22	2023-09-29	61.81	1.69	73	25.55	female
9	M3	R3	Newton	Heel	left	110	2023-09-22	2023-09-29	61.81	1.69	73	25.55	female
9	M3	R1	Newton	1st TP	left	42.6	2023-09-22	2023-09-29	61.81	1.69	73	25.55	female
9	M3	R2	Newton	1st TP	left	50.6	2023-09-22	2023-09-29	61.81	1.69	73	25.55	female
9	M3	R3	Newton	1st TP	left	51	2023-09-22	2023-09-29	61.81	1.69	73	25.55	female
10	M1	R1	Newton	1st MH	right	62.4	2023-09-22	2023-09-29	59.81	1.72	80	27.04	male
10	M1	R2	Newton	1st MH	right	85.2	2023-09-22	2023-09-29	59.81	1.72	80	27.04	male
10	M1	R3	Newton	1st MH	right	85.8	2023-09-22	2023-09-29	59.81	1.72	80	27.04	male
10	M1	R1	Newton	5th MH	right	95.9	2023-09-22	2023-09-29	59.81	1.72	80	27.04	male
10	M1	R2	Newton	5th MH	right	99.8	2023-09-22	2023-09-29	59.81	1.72	80	27.04	male
10	M1	R3	Newton	5th MH	right	94.6	2023-09-22	2023-09-29	59.81	1.72	80	27.04	male
10	M1	R1	Newton	Heel	right	110	2023-09-22	2023-09-29	59.81	1.72	80	27.04	male
10	M1	R2	Newton	Heel	right	110	2023-09-22	2023-09-29	59.81	1.72	80	27.04	male
10	M1	R3	Newton	Heel	right	110	2023-09-22	2023-09-29	59.81	1.72	80	27.04	male
10	M1	R1	Newton	1st TP	right	69	2023-09-22	2023-09-29	59.81	1.72	80	27.04	male
10	M1	R2	Newton	1st TP	right	61.1	2023-09-22	2023-09-29	59.81	1.72	80	27.04	male
10	M1	R3	Newton	1st TP	right	64.6	2023-09-22	2023-09-29	59.81	1.72	80	27.04	male
10	M1	R1	Newton	1st MH	left	68.6	2023-09-22	2023-09-29	59.81	1.72	80	27.04	male
10	M1	R2	Newton	1st MH	left	86.2	2023-09-22	2023-09-29	59.81	1.72	80	27.04	male
10	M1	R3	Newton	1st MH	left	82.2	2023-09-22	2023-09-29	59.81	1.72	80	27.04	male
10	M1	R1	Newton	5th MH	left	99.4	2023-09-22	2023-09-29	59.81	1.72	80	27.04	male
10	M1	R2	Newton	5th MH	left	85.3	2023-09-22	2023-09-29	59.81	1.72	80	27.04	male
10	M1	R3	Newton	5th MH	left	97.2	2023-09-22	2023-09-29	59.81	1.72	80	27.04	male
10	M1	R1	Newton	Heel	left	110	2023-09-22	2023-09-29	59.81	1.72	80	27.04	male
10	M1	R2	Newton	Heel	left	110	2023-09-22	2023-09-29	59.81	1.72	80	27.04	male
10	M1	R3	Newton	Heel	left	110	2023-09-22	2023-09-29	59.81	1.72	80	27.04	male
10	M1	R1	Newton	1st TP	left	62.9	2023-09-22	2023-09-29	59.81	1.72	80	27.04	male
10	M1	R2	Newton	1st TP	left	65.5	2023-09-22	2023-09-29	59.81	1.72	80	27.04	male
10	M1	R3	Newton	1st TP	left	73.4	2023-09-22	2023-09-29	59.81	1.72	80	27.04	male
10	M2	R1	Newton	1st MH	right	75.2	2023-09-22	2023-09-29	59.81	1.72	80	27.04	male
10	M2	R2	Newton	1st MH	right	89.7	2023-09-22	2023-09-29	59.81	1.72	80	27.04	male
10	M2	R3	Newton	1st MH	right	94.1	2023-09-22	2023-09-29	59.81	1.72	80	27.04	male
10	M2	R1	Newton	5th MH	right	110	2023-09-22	2023-09-29	59.81	1.72	80	27.04	male
10	M2	R2	Newton	5th MH	right	90.2	2023-09-22	2023-09-29	59.81	1.72	80	27.04	male
10	M2	R3	Newton	5th MH	right	98.1	2023-09-22	2023-09-29	59.81	1.72	80	27.04	male
10	M2	R1	Newton	Heel	right	110	2023-09-22	2023-09-29	59.81	1.72	80	27.04	male
10	M2	R2	Newton	Heel	right	110	2023-09-22	2023-09-29	59.81	1.72	80	27.04	male
10	M2	R3	Newton	Heel	right	110	2023-09-22	2023-09-29	59.81	1.72	80	27.04	male
10	M2	R1	Newton	1st TP	right	55.8	2023-09-22	2023-09-29	59.81	1.72	80	27.04	male
10	M2	R2	Newton	1st TP	right	58.5	2023-09-22	2023-09-29	59.81	1.72	80	27.04	male
10	M2	R3	Newton	1st TP	right	58.9	2023-09-22	2023-09-29	59.81	1.72	80	27.04	male
10	M2	R1	Newton	1st MH	left	87.5	2023-09-22	2023-09-29	59.81	1.72	80	27.04	male
10	M2	R2	Newton	1st MH	left	89.7	2023-09-22	2023-09-29	59.81	1.72	80	27.04	male
10	M2	R3	Newton	1st MH	left	93.7	2023-09-22	2023-09-29	59.81	1.72	80	27.04	male
10	M2	R1	Newton	5th MH	left	104	2023-09-22	2023-09-29	59.81	1.72	80	27.04	male
10	M2	R2	Newton	5th MH	left	102	2023-09-22	2023-09-29	59.81	1.72	80	27.04	male
10	M2	R3	Newton	5th MH	left	110	2023-09-22	2023-09-29	59.81	1.72	80	27.04	male
10	M2	R1	Newton	Heel	left	110	2023-09-22	2023-09-29	59.81	1.72	80	27.04	male
10	M2	R2	Newton	Heel	left	110	2023-09-22	2023-09-29	59.81	1.72	80	27.04	male
10	M2	R3	Newton	Heel	left	110	2023-09-22	2023-09-29	59.81	1.72	80	27.04	male
10	M2	R1	Newton	1st TP	left	59.4	2023-09-22	2023-09-29	59.81	1.72	80	27.04	male
10	M2	R2	Newton	1st TP	left	56.3	2023-09-22	2023-09-29	59.81	1.72	80	27.04	male
10	M2	R3	Newton	1st TP	left	61.1	2023-09-22	2023-09-29	59.81	1.72	80	27.04	male
10	M3	R1	Newton	1st MH	right	89.3	2023-09-22	2023-09-29	59.81	1.72	80	27.04	male
10	M3	R2	Newton	1st MH	right	78.7	2023-09-22	2023-09-29	59.81	1.72	80	27.04	male
10	M3	R3	Newton	1st MH	right	84	2023-09-22	2023-09-29	59.81	1.72	80	27.04	male
10	M3	R1	Newton	5th MH	right	110	2023-09-22	2023-09-29	59.81	1.72	80	27.04	male
10	M3	R2	Newton	5th MH	right	101	2023-09-22	2023-09-29	59.81	1.72	80	27.04	male
10	M3	R3	Newton	5th MH	right	93.7	2023-09-22	2023-09-29	59.81	1.72	80	27.04	male
10	M3	R1	Newton	Heel	right	110	2023-09-22	2023-09-29	59.81	1.72	80	27.04	male
10	M3	R2	Newton	Heel	right	110	2023-09-22	2023-09-29	59.81	1.72	80	27.04	male
10	M3	R3	Newton	Heel	right	110	2023-09-22	2023-09-29	59.81	1.72	80	27.04	male
10	M3	R1	Newton	1st TP	right	60.2	2023-09-22	2023-09-29	59.81	1.72	80	27.04	male
10	M3	R2	Newton	1st TP	right	59.8	2023-09-22	2023-09-29	59.81	1.72	80	27.04	male
10	M3	R3	Newton	1st TP	right	53.2	2023-09-22	2023-09-29	59.81	1.72	80	27.04	male
10	M3	R1	Newton	1st MH	left	82.7	2023-09-22	2023-09-29	59.81	1.72	80	27.04	male
10	M3	R2	Newton	1st MH	left	82.7	2023-09-22	2023-09-29	59.81	1.72	80	27.04	male
10	M3	R3	Newton	1st MH	left	87.1	2023-09-22	2023-09-29	59.81	1.72	80	27.04	male
10	M3	R1	Newton	5th MH	left	110	2023-09-22	2023-09-29	59.81	1.72	80	27.04	male
10	M3	R2	Newton	5th MH	left	92.4	2023-09-22	2023-09-29	59.81	1.72	80	27.04	male
10	M3	R3	Newton	5th MH	left	92.4	2023-09-22	2023-09-29	59.81	1.72	80	27.04	male
10	M3	R1	Newton	Heel	left	110	2023-09-22	2023-09-29	59.81	1.72	80	27.04	male
10	M3	R2	Newton	Heel	left	110	2023-09-22	2023-09-29	59.81	1.72	80	27.04	male
10	M3	R3	Newton	Heel	left	110	2023-09-22	2023-09-29	59.81	1.72	80	27.04	male
10	M3	R1	Newton	1st TP	left	55.4	2023-09-22	2023-09-29	59.81	1.72	80	27.04	male
10	M3	R2	Newton	1st TP	left	65.1	2023-09-22	2023-09-29	59.81	1.72	80	27.04	male
10	M3	R3	Newton	1st TP	left	64.2	2023-09-22	2023-09-29	59.81	1.72	80	27.04	male
11	M1	R1	Newton	1st MH	right	33.8	2023-09-22	2023-09-29	59.01	1.65	81	29.75	female
11	M1	R2	Newton	1st MH	right	35.2	2023-09-22	2023-09-29	59.01	1.65	81	29.75	female
11	M1	R3	Newton	1st MH	right	36.9	2023-09-22	2023-09-29	59.01	1.65	81	29.75	female
11	M1	R1	Newton	5th MH	right	40.4	2023-09-22	2023-09-29	59.01	1.65	81	29.75	female
11	M1	R2	Newton	5th MH	right	52.8	2023-09-22	2023-09-29	59.01	1.65	81	29.75	female
11	M1	R3	Newton	5th MH	right	57.2	2023-09-22	2023-09-29	59.01	1.65	81	29.75	female
11	M1	R1	Newton	Heel	right	58.9	2023-09-22	2023-09-29	59.01	1.65	81	29.75	female
11	M1	R2	Newton	Heel	right	76.5	2023-09-22	2023-09-29	59.01	1.65	81	29.75	female
11	M1	R3	Newton	Heel	right	70.4	2023-09-22	2023-09-29	59.01	1.65	81	29.75	female
11	M1	R1	Newton	1st TP	right	22.4	2023-09-22	2023-09-29	59.01	1.65	81	29.75	female
11	M1	R2	Newton	1st TP	right	22	2023-09-22	2023-09-29	59.01	1.65	81	29.75	female
11	M1	R3	Newton	1st TP	right	19.8	2023-09-22	2023-09-29	59.01	1.65	81	29.75	female
11	M1	R1	Newton	1st MH	left	33.4	2023-09-22	2023-09-29	59.01	1.65	81	29.75	female
11	M1	R2	Newton	1st MH	left	32.1	2023-09-22	2023-09-29	59.01	1.65	81	29.75	female
11	M1	R3	Newton	1st MH	left	44.8	2023-09-22	2023-09-29	59.01	1.65	81	29.75	female
11	M1	R1	Newton	5th MH	left	51	2023-09-22	2023-09-29	59.01	1.65	81	29.75	female
11	M1	R2	Newton	5th MH	left	62.4	2023-09-22	2023-09-29	59.01	1.65	81	29.75	female
11	M1	R3	Newton	5th MH	left	71.2	2023-09-22	2023-09-29	59.01	1.65	81	29.75	female
11	M1	R1	Newton	Heel	left	66	2023-09-22	2023-09-29	59.01	1.65	81	29.75	female
11	M1	R2	Newton	Heel	left	73.9	2023-09-22	2023-09-29	59.01	1.65	81	29.75	female
11	M1	R3	Newton	Heel	left	73.9	2023-09-22	2023-09-29	59.01	1.65	81	29.75	female
11	M1	R1	Newton	1st TP	left	23.3	2023-09-22	2023-09-29	59.01	1.65	81	29.75	female
11	M1	R2	Newton	1st TP	left	22	2023-09-22	2023-09-29	59.01	1.65	81	29.75	female
11	M1	R3	Newton	1st TP	left	26.4	2023-09-22	2023-09-29	59.01	1.65	81	29.75	female
11	M2	R1	Newton	1st MH	right	28.1	2023-09-22	2023-09-29	59.01	1.65	81	29.75	female
11	M2	R2	Newton	1st MH	right	32.5	2023-09-22	2023-09-29	59.01	1.65	81	29.75	female
11	M2	R3	Newton	1st MH	right	40	2023-09-22	2023-09-29	59.01	1.65	81	29.75	female
11	M2	R1	Newton	5th MH	right	32.5	2023-09-22	2023-09-29	59.01	1.65	81	29.75	female
11	M2	R2	Newton	5th MH	right	40.9	2023-09-22	2023-09-29	59.01	1.65	81	29.75	female
11	M2	R3	Newton	5th MH	right	42.2	2023-09-22	2023-09-29	59.01	1.65	81	29.75	female
11	M2	R1	Newton	Heel	right	53.2	2023-09-22	2023-09-29	59.01	1.65	81	29.75	female
11	M2	R2	Newton	Heel	right	58.5	2023-09-22	2023-09-29	59.01	1.65	81	29.75	female
11	M2	R3	Newton	Heel	right	58	2023-09-22	2023-09-29	59.01	1.65	81	29.75	female
11	M2	R1	Newton	1st TP	right	25	2023-09-22	2023-09-29	59.01	1.65	81	29.75	female
11	M2	R2	Newton	1st TP	right	34.3	2023-09-22	2023-09-29	59.01	1.65	81	29.75	female
11	M2	R3	Newton	1st TP	right	34.3	2023-09-22	2023-09-29	59.01	1.65	81	29.75	female
11	M2	R1	Newton	1st MH	left	37.8	2023-09-22	2023-09-29	59.01	1.65	81	29.75	female
11	M2	R2	Newton	1st MH	left	43.1	2023-09-22	2023-09-29	59.01	1.65	81	29.75	female
11	M2	R3	Newton	1st MH	left	43.5	2023-09-22	2023-09-29	59.01	1.65	81	29.75	female
11	M2	R1	Newton	5th MH	left	36.5	2023-09-22	2023-09-29	59.01	1.65	81	29.75	female
11	M2	R2	Newton	5th MH	left	49.2	2023-09-22	2023-09-29	59.01	1.65	81	29.75	female
11	M2	R3	Newton	5th MH	left	49.2	2023-09-22	2023-09-29	59.01	1.65	81	29.75	female
11	M2	R1	Newton	Heel	left	51	2023-09-22	2023-09-29	59.01	1.65	81	29.75	female
11	M2	R2	Newton	Heel	left	51	2023-09-22	2023-09-29	59.01	1.65	81	29.75	female
11	M2	R3	Newton	Heel	left	54.5	2023-09-22	2023-09-29	59.01	1.65	81	29.75	female
11	M2	R1	Newton	1st TP	left	26.4	2023-09-22	2023-09-29	59.01	1.65	81	29.75	female
11	M2	R2	Newton	1st TP	left	22.8	2023-09-22	2023-09-29	59.01	1.65	81	29.75	female
11	M2	R3	Newton	1st TP	left	38.7	2023-09-22	2023-09-29	59.01	1.65	81	29.75	female
11	M3	R1	Newton	1st MH	right	42.2	2023-09-22	2023-09-29	59.01	1.65	81	29.75	female
11	M3	R2	Newton	1st MH	right	47.5	2023-09-22	2023-09-29	59.01	1.65	81	29.75	female
11	M3	R3	Newton	1st MH	right	47.5	2023-09-22	2023-09-29	59.01	1.65	81	29.75	female
11	M3	R1	Newton	5th MH	right	52.3	2023-09-22	2023-09-29	59.01	1.65	81	29.75	female
11	M3	R2	Newton	5th MH	right	66	2023-09-22	2023-09-29	59.01	1.65	81	29.75	female
11	M3	R3	Newton	5th MH	right	58	2023-09-22	2023-09-29	59.01	1.65	81	29.75	female
11	M3	R1	Newton	Heel	right	73.4	2023-09-22	2023-09-29	59.01	1.65	81	29.75	female
11	M3	R2	Newton	Heel	right	73	2023-09-22	2023-09-29	59.01	1.65	81	29.75	female
11	M3	R3	Newton	Heel	right	80.5	2023-09-22	2023-09-29	59.01	1.65	81	29.75	female
11	M3	R1	Newton	1st TP	right	25.9	2023-09-22	2023-09-29	59.01	1.65	81	29.75	female
11	M3	R2	Newton	1st TP	right	27.7	2023-09-22	2023-09-29	59.01	1.65	81	29.75	female
11	M3	R3	Newton	1st TP	right	32.5	2023-09-22	2023-09-29	59.01	1.65	81	29.75	female
11	M3	R1	Newton	1st MH	left	41.8	2023-09-22	2023-09-29	59.01	1.65	81	29.75	female
11	M3	R2	Newton	1st MH	left	39.1	2023-09-22	2023-09-29	59.01	1.65	81	29.75	female
11	M3	R3	Newton	1st MH	left	48.4	2023-09-22	2023-09-29	59.01	1.65	81	29.75	female
11	M3	R1	Newton	5th MH	left	60.2	2023-09-22	2023-09-29	59.01	1.65	81	29.75	female
11	M3	R2	Newton	5th MH	left	57.2	2023-09-22	2023-09-29	59.01	1.65	81	29.75	female
11	M3	R3	Newton	5th MH	left	58	2023-09-22	2023-09-29	59.01	1.65	81	29.75	female
11	M3	R1	Newton	Heel	left	75.2	2023-09-22	2023-09-29	59.01	1.65	81	29.75	female
11	M3	R2	Newton	Heel	left	64.6	2023-09-22	2023-09-29	59.01	1.65	81	29.75	female
11	M3	R3	Newton	Heel	left	70.4	2023-09-22	2023-09-29	59.01	1.65	81	29.75	female
11	M3	R1	Newton	1st TP	left	23.7	2023-09-22	2023-09-29	59.01	1.65	81	29.75	female
11	M3	R2	Newton	1st TP	left	27.2	2023-09-22	2023-09-29	59.01	1.65	81	29.75	female
11	M3	R3	Newton	1st TP	left	25.9	2023-09-22	2023-09-29	59.01	1.65	81	29.75	female
12	M1	R1	Newton	1st MH	right	69.9	2023-09-22	2023-09-29	66.91	1.49	63	28.38	female
12	M1	R2	Newton	1st MH	right	97.2	2023-09-22	2023-09-29	66.91	1.49	63	28.38	female
12	M1	R3	Newton	1st MH	right	73.9	2023-09-22	2023-09-29	66.91	1.49	63	28.38	female
12	M1	R1	Newton	5th MH	right	99.4	2023-09-22	2023-09-29	66.91	1.49	63	28.38	female
12	M1	R2	Newton	5th MH	right	88.8	2023-09-22	2023-09-29	66.91	1.49	63	28.38	female
12	M1	R3	Newton	5th MH	right	76.5	2023-09-22	2023-09-29	66.91	1.49	63	28.38	female
12	M1	R1	Newton	Heel	right	110	2023-09-22	2023-09-29	66.91	1.49	63	28.38	female
12	M1	R2	Newton	Heel	right	110	2023-09-22	2023-09-29	66.91	1.49	63	28.38	female
12	M1	R3	Newton	Heel	right	110	2023-09-22	2023-09-29	66.91	1.49	63	28.38	female
12	M1	R1	Newton	1st TP	right	55.8	2023-09-22	2023-09-29	66.91	1.49	63	28.38	female
12	M1	R2	Newton	1st TP	right	38.2	2023-09-22	2023-09-29	66.91	1.49	63	28.38	female
12	M1	R3	Newton	1st TP	right	37.4	2023-09-22	2023-09-29	66.91	1.49	63	28.38	female
12	M1	R1	Newton	1st MH	left	69	2023-09-22	2023-09-29	66.91	1.49	63	28.38	female
12	M1	R2	Newton	1st MH	left	62.9	2023-09-22	2023-09-29	66.91	1.49	63	28.38	female
12	M1	R3	Newton	1st MH	left	73.4	2023-09-22	2023-09-29	66.91	1.49	63	28.38	female
12	M1	R1	Newton	5th MH	left	105	2023-09-22	2023-09-29	66.91	1.49	63	28.38	female
12	M1	R2	Newton	5th MH	left	74.8	2023-09-22	2023-09-29	66.91	1.49	63	28.38	female
12	M1	R3	Newton	5th MH	left	71.7	2023-09-22	2023-09-29	66.91	1.49	63	28.38	female
12	M1	R1	Newton	Heel	left	110	2023-09-22	2023-09-29	66.91	1.49	63	28.38	female
12	M1	R2	Newton	Heel	left	110	2023-09-22	2023-09-29	66.91	1.49	63	28.38	female
12	M1	R3	Newton	Heel	left	110	2023-09-22	2023-09-29	66.91	1.49	63	28.38	female
12	M1	R1	Newton	1st TP	left	62	2023-09-22	2023-09-29	66.91	1.49	63	28.38	female
12	M1	R2	Newton	1st TP	left	52.8	2023-09-22	2023-09-29	66.91	1.49	63	28.38	female
12	M1	R3	Newton	1st TP	left	62.4	2023-09-22	2023-09-29	66.91	1.49	63	28.38	female
12	M2	R1	Newton	1st MH	right	74.8	2023-09-22	2023-09-29	66.91	1.49	63	28.38	female
12	M2	R2	Newton	1st MH	right	95	2023-09-22	2023-09-29	66.91	1.49	63	28.38	female
12	M2	R3	Newton	1st MH	right	78.7	2023-09-22	2023-09-29	66.91	1.49	63	28.38	female
12	M2	R1	Newton	5th MH	right	66.4	2023-09-22	2023-09-29	66.91	1.49	63	28.38	female
12	M2	R2	Newton	5th MH	right	73.4	2023-09-22	2023-09-29	66.91	1.49	63	28.38	female
12	M2	R3	Newton	5th MH	right	77.4	2023-09-22	2023-09-29	66.91	1.49	63	28.38	female
12	M2	R1	Newton	Heel	right	110	2023-09-22	2023-09-29	66.91	1.49	63	28.38	female
12	M2	R2	Newton	Heel	right	110	2023-09-22	2023-09-29	66.91	1.49	63	28.38	female
12	M2	R3	Newton	Heel	right	110	2023-09-22	2023-09-29	66.91	1.49	63	28.38	female
12	M2	R1	Newton	1st TP	right	31.6	2023-09-22	2023-09-29	66.91	1.49	63	28.38	female
12	M2	R2	Newton	1st TP	right	36	2023-09-22	2023-09-29	66.91	1.49	63	28.38	female
12	M2	R3	Newton	1st TP	right	48.4	2023-09-22	2023-09-29	66.91	1.49	63	28.38	female
12	M2	R1	Newton	1st MH	left	73.9	2023-09-22	2023-09-29	66.91	1.49	63	28.38	female
12	M2	R2	Newton	1st MH	left	59.4	2023-09-22	2023-09-29	66.91	1.49	63	28.38	female
12	M2	R3	Newton	1st MH	left	72.6	2023-09-22	2023-09-29	66.91	1.49	63	28.38	female
12	M2	R1	Newton	5th MH	left	88	2023-09-22	2023-09-29	66.91	1.49	63	28.38	female
12	M2	R2	Newton	5th MH	left	89.7	2023-09-22	2023-09-29	66.91	1.49	63	28.38	female
12	M2	R3	Newton	5th MH	left	52.3	2023-09-22	2023-09-29	66.91	1.49	63	28.38	female
12	M2	R1	Newton	Heel	left	110	2023-09-22	2023-09-29	66.91	1.49	63	28.38	female
12	M2	R2	Newton	Heel	left	110	2023-09-22	2023-09-29	66.91	1.49	63	28.38	female
12	M2	R3	Newton	Heel	left	110	2023-09-22	2023-09-29	66.91	1.49	63	28.38	female
12	M2	R1	Newton	1st TP	left	40.9	2023-09-22	2023-09-29	66.91	1.49	63	28.38	female
12	M2	R2	Newton	1st TP	left	50.1	2023-09-22	2023-09-29	66.91	1.49	63	28.38	female
12	M2	R3	Newton	1st TP	left	56.3	2023-09-22	2023-09-29	66.91	1.49	63	28.38	female
12	M3	R1	Newton	1st MH	right	69.5	2023-09-22	2023-09-29	66.91	1.49	63	28.38	female
12	M3	R2	Newton	1st MH	right	69	2023-09-22	2023-09-29	66.91	1.49	63	28.38	female
12	M3	R3	Newton	1st MH	right	72.1	2023-09-22	2023-09-29	66.91	1.49	63	28.38	female
12	M3	R1	Newton	5th MH	right	86.2	2023-09-22	2023-09-29	66.91	1.49	63	28.38	female
12	M3	R2	Newton	5th MH	right	79.6	2023-09-22	2023-09-29	66.91	1.49	63	28.38	female
12	M3	R3	Newton	5th MH	right	78.3	2023-09-22	2023-09-29	66.91	1.49	63	28.38	female
12	M3	R1	Newton	Heel	right	83.1	2023-09-22	2023-09-29	66.91	1.49	63	28.38	female
12	M3	R2	Newton	Heel	right	88.4	2023-09-22	2023-09-29	66.91	1.49	63	28.38	female
12	M3	R3	Newton	Heel	right	87.5	2023-09-22	2023-09-29	66.91	1.49	63	28.38	female
12	M3	R1	Newton	1st TP	right	66.8	2023-09-22	2023-09-29	66.91	1.49	63	28.38	female
12	M3	R2	Newton	1st TP	right	59.8	2023-09-22	2023-09-29	66.91	1.49	63	28.38	female
12	M3	R3	Newton	1st TP	right	66.4	2023-09-22	2023-09-29	66.91	1.49	63	28.38	female
12	M3	R1	Newton	1st MH	left	78.3	2023-09-22	2023-09-29	66.91	1.49	63	28.38	female
12	M3	R2	Newton	1st MH	left	77.8	2023-09-22	2023-09-29	66.91	1.49	63	28.38	female
12	M3	R3	Newton	1st MH	left	64.6	2023-09-22	2023-09-29	66.91	1.49	63	28.38	female
12	M3	R1	Newton	5th MH	left	81.4	2023-09-22	2023-09-29	66.91	1.49	63	28.38	female
12	M3	R2	Newton	5th MH	left	84.4	2023-09-22	2023-09-29	66.91	1.49	63	28.38	female
12	M3	R3	Newton	5th MH	left	75.2	2023-09-22	2023-09-29	66.91	1.49	63	28.38	female
12	M3	R1	Newton	Heel	left	88	2023-09-22	2023-09-29	66.91	1.49	63	28.38	female
12	M3	R2	Newton	Heel	left	98.5	2023-09-22	2023-09-29	66.91	1.49	63	28.38	female
12	M3	R3	Newton	Heel	left	96.3	2023-09-22	2023-09-29	66.91	1.49	63	28.38	female
12	M3	R1	Newton	1st TP	left	65.1	2023-09-22	2023-09-29	66.91	1.49	63	28.38	female
12	M3	R2	Newton	1st TP	left	58.5	2023-09-22	2023-09-29	66.91	1.49	63	28.38	female
12	M3	R3	Newton	1st TP	left	55.8	2023-09-22	2023-09-29	66.91	1.49	63	28.38	female
13	M1	R1	Newton	1st MH	right	97.6	2023-09-22	2023-09-29	75.72	1.71	77	26.33	male
13	M1	R2	Newton	1st MH	right	83.1	2023-09-22	2023-09-29	75.72	1.71	77	26.33	male
13	M1	R3	Newton	1st MH	right	96.8	2023-09-22	2023-09-29	75.72	1.71	77	26.33	male
13	M1	R1	Newton	5th MH	right	66.4	2023-09-22	2023-09-29	75.72	1.71	77	26.33	male
13	M1	R2	Newton	5th MH	right	77.8	2023-09-22	2023-09-29	75.72	1.71	77	26.33	male
13	M1	R3	Newton	5th MH	right	65.5	2023-09-22	2023-09-29	75.72	1.71	77	26.33	male
13	M1	R1	Newton	Heel	right	110	2023-09-22	2023-09-29	75.72	1.71	77	26.33	male
13	M1	R2	Newton	Heel	right	102	2023-09-22	2023-09-29	75.72	1.71	77	26.33	male
13	M1	R3	Newton	Heel	right	100	2023-09-22	2023-09-29	75.72	1.71	77	26.33	male
13	M1	R1	Newton	1st TP	right	39.6	2023-09-22	2023-09-29	75.72	1.71	77	26.33	male
13	M1	R2	Newton	1st TP	right	39.6	2023-09-22	2023-09-29	75.72	1.71	77	26.33	male
13	M1	R3	Newton	1st TP	right	48.4	2023-09-22	2023-09-29	75.72	1.71	77	26.33	male
13	M1	R1	Newton	1st MH	left	81.8	2023-09-22	2023-09-29	75.72	1.71	77	26.33	male
13	M1	R2	Newton	1st MH	left	83.1	2023-09-22	2023-09-29	75.72	1.71	77	26.33	male
13	M1	R3	Newton	1st MH	left	101	2023-09-22	2023-09-29	75.72	1.71	77	26.33	male
13	M1	R1	Newton	5th MH	left	69.9	2023-09-22	2023-09-29	75.72	1.71	77	26.33	male
13	M1	R2	Newton	5th MH	left	61.1	2023-09-22	2023-09-29	75.72	1.71	77	26.33	male
13	M1	R3	Newton	5th MH	left	66	2023-09-22	2023-09-29	75.72	1.71	77	26.33	male
13	M1	R1	Newton	Heel	left	107	2023-09-22	2023-09-29	75.72	1.71	77	26.33	male
13	M1	R2	Newton	Heel	left	102	2023-09-22	2023-09-29	75.72	1.71	77	26.33	male
13	M1	R3	Newton	Heel	left	109	2023-09-22	2023-09-29	75.72	1.71	77	26.33	male
13	M1	R1	Newton	1st TP	left	38.7	2023-09-22	2023-09-29	75.72	1.71	77	26.33	male
13	M1	R2	Newton	1st TP	left	45.7	2023-09-22	2023-09-29	75.72	1.71	77	26.33	male
13	M1	R3	Newton	1st TP	left	36.5	2023-09-22	2023-09-29	75.72	1.71	77	26.33	male
13	M2	R1	Newton	1st MH	right	69.9	2023-09-22	2023-09-29	75.72	1.71	77	26.33	male
13	M2	R2	Newton	1st MH	right	105	2023-09-22	2023-09-29	75.72	1.71	77	26.33	male
13	M2	R3	Newton	1st MH	right	81.8	2023-09-22	2023-09-29	75.72	1.71	77	26.33	male
13	M2	R1	Newton	5th MH	right	63.3	2023-09-22	2023-09-29	75.72	1.71	77	26.33	male
13	M2	R2	Newton	5th MH	right	72.6	2023-09-22	2023-09-29	75.72	1.71	77	26.33	male
13	M2	R3	Newton	5th MH	right	84.4	2023-09-22	2023-09-29	75.72	1.71	77	26.33	male
13	M2	R1	Newton	Heel	right	110	2023-09-22	2023-09-29	75.72	1.71	77	26.33	male
13	M2	R2	Newton	Heel	right	110	2023-09-22	2023-09-29	75.72	1.71	77	26.33	male
13	M2	R3	Newton	Heel	right	106	2023-09-22	2023-09-29	75.72	1.71	77	26.33	male
13	M2	R1	Newton	1st TP	right	46.6	2023-09-22	2023-09-29	75.72	1.71	77	26.33	male
13	M2	R2	Newton	1st TP	right	59.8	2023-09-22	2023-09-29	75.72	1.71	77	26.33	male
13	M2	R3	Newton	1st TP	right	57.6	2023-09-22	2023-09-29	75.72	1.71	77	26.33	male
13	M2	R1	Newton	1st MH	left	82.7	2023-09-22	2023-09-29	75.72	1.71	77	26.33	male
13	M2	R2	Newton	1st MH	left	85.8	2023-09-22	2023-09-29	75.72	1.71	77	26.33	male
13	M2	R3	Newton	1st MH	left	90.2	2023-09-22	2023-09-29	75.72	1.71	77	26.33	male
13	M2	R1	Newton	5th MH	left	63.8	2023-09-22	2023-09-29	75.72	1.71	77	26.33	male
13	M2	R2	Newton	5th MH	left	58.9	2023-09-22	2023-09-29	75.72	1.71	77	26.33	male
13	M2	R3	Newton	5th MH	left	61.6	2023-09-22	2023-09-29	75.72	1.71	77	26.33	male
13	M2	R1	Newton	Heel	left	110	2023-09-22	2023-09-29	75.72	1.71	77	26.33	male
13	M2	R2	Newton	Heel	left	95.4	2023-09-22	2023-09-29	75.72	1.71	77	26.33	male
13	M2	R3	Newton	Heel	left	91.5	2023-09-22	2023-09-29	75.72	1.71	77	26.33	male
13	M2	R1	Newton	1st TP	left	47.5	2023-09-22	2023-09-29	75.72	1.71	77	26.33	male
13	M2	R2	Newton	1st TP	left	47	2023-09-22	2023-09-29	75.72	1.71	77	26.33	male
13	M2	R3	Newton	1st TP	left	46.6	2023-09-22	2023-09-29	75.72	1.71	77	26.33	male
13	M3	R1	Newton	1st MH	right	92.4	2023-09-22	2023-09-29	75.72	1.71	77	26.33	male
13	M3	R2	Newton	1st MH	right	83.1	2023-09-22	2023-09-29	75.72	1.71	77	26.33	male
13	M3	R3	Newton	1st MH	right	85.3	2023-09-22	2023-09-29	75.72	1.71	77	26.33	male
13	M3	R1	Newton	5th MH	right	64.2	2023-09-22	2023-09-29	75.72	1.71	77	26.33	male
13	M3	R2	Newton	5th MH	right	73	2023-09-22	2023-09-29	75.72	1.71	77	26.33	male
13	M3	R3	Newton	5th MH	right	76.5	2023-09-22	2023-09-29	75.72	1.71	77	26.33	male
13	M3	R1	Newton	Heel	right	96.3	2023-09-22	2023-09-29	75.72	1.71	77	26.33	male
13	M3	R2	Newton	Heel	right	98.1	2023-09-22	2023-09-29	75.72	1.71	77	26.33	male
13	M3	R3	Newton	Heel	right	93.7	2023-09-22	2023-09-29	75.72	1.71	77	26.33	male
13	M3	R1	Newton	1st TP	right	51	2023-09-22	2023-09-29	75.72	1.71	77	26.33	male
13	M3	R2	Newton	1st TP	right	51	2023-09-22	2023-09-29	75.72	1.71	77	26.33	male
13	M3	R3	Newton	1st TP	right	51.4	2023-09-22	2023-09-29	75.72	1.71	77	26.33	male
13	M3	R1	Newton	1st MH	left	77.4	2023-09-22	2023-09-29	75.72	1.71	77	26.33	male
13	M3	R2	Newton	1st MH	left	84.9	2023-09-22	2023-09-29	75.72	1.71	77	26.33	male
13	M3	R3	Newton	1st MH	left	92.8	2023-09-22	2023-09-29	75.72	1.71	77	26.33	male
13	M3	R1	Newton	5th MH	left	73	2023-09-22	2023-09-29	75.72	1.71	77	26.33	male
13	M3	R2	Newton	5th MH	left	79.2	2023-09-22	2023-09-29	75.72	1.71	77	26.33	male
13	M3	R3	Newton	5th MH	left	80.9	2023-09-22	2023-09-29	75.72	1.71	77	26.33	male
13	M3	R1	Newton	Heel	left	88.8	2023-09-22	2023-09-29	75.72	1.71	77	26.33	male
13	M3	R2	Newton	Heel	left	95.4	2023-09-22	2023-09-29	75.72	1.71	77	26.33	male
13	M3	R3	Newton	Heel	left	89.7	2023-09-22	2023-09-29	75.72	1.71	77	26.33	male
13	M3	R1	Newton	1st TP	left	48.4	2023-09-22	2023-09-29	75.72	1.71	77	26.33	male
13	M3	R2	Newton	1st TP	left	46.2	2023-09-22	2023-09-29	75.72	1.71	77	26.33	male
13	M3	R3	Newton	1st TP	left	46.6	2023-09-22	2023-09-29	75.72	1.71	77	26.33	male
14	M1	R1	Newton	1st MH	right	42.6	2023-09-22	2023-09-29	62.03	1.62	59	22.48	male
14	M1	R2	Newton	1st MH	right	51.9	2023-09-22	2023-09-29	62.03	1.62	59	22.48	male
14	M1	R3	Newton	1st MH	right	48.4	2023-09-22	2023-09-29	62.03	1.62	59	22.48	male
14	M1	R1	Newton	5th MH	right	37.8	2023-09-22	2023-09-29	62.03	1.62	59	22.48	male
14	M1	R2	Newton	5th MH	right	47.9	2023-09-22	2023-09-29	62.03	1.62	59	22.48	male
14	M1	R3	Newton	5th MH	right	55	2023-09-22	2023-09-29	62.03	1.62	59	22.48	male
14	M1	R1	Newton	Heel	right	31.2	2023-09-22	2023-09-29	62.03	1.62	59	22.48	male
14	M1	R2	Newton	Heel	right	51.4	2023-09-22	2023-09-29	62.03	1.62	59	22.48	male
14	M1	R3	Newton	Heel	right	46.6	2023-09-22	2023-09-29	62.03	1.62	59	22.48	male
14	M1	R1	Newton	1st TP	right	17.6	2023-09-22	2023-09-29	62.03	1.62	59	22.48	male
14	M1	R2	Newton	1st TP	right	25.9	2023-09-22	2023-09-29	62.03	1.62	59	22.48	male
14	M1	R3	Newton	1st TP	right	34.3	2023-09-22	2023-09-29	62.03	1.62	59	22.48	male
14	M1	R1	Newton	1st MH	left	44.4	2023-09-22	2023-09-29	62.03	1.62	59	22.48	male
14	M1	R2	Newton	1st MH	left	47.5	2023-09-22	2023-09-29	62.03	1.62	59	22.48	male
14	M1	R3	Newton	1st MH	left	55	2023-09-22	2023-09-29	62.03	1.62	59	22.48	male
14	M1	R1	Newton	5th MH	left	52.8	2023-09-22	2023-09-29	62.03	1.62	59	22.48	male
14	M1	R2	Newton	5th MH	left	58.5	2023-09-22	2023-09-29	62.03	1.62	59	22.48	male
14	M1	R3	Newton	5th MH	left	58.5	2023-09-22	2023-09-29	62.03	1.62	59	22.48	male
14	M1	R1	Newton	Heel	left	39.6	2023-09-22	2023-09-29	62.03	1.62	59	22.48	male
14	M1	R2	Newton	Heel	left	50.1	2023-09-22	2023-09-29	62.03	1.62	59	22.48	male
14	M1	R3	Newton	Heel	left	47.9	2023-09-22	2023-09-29	62.03	1.62	59	22.48	male
14	M1	R1	Newton	1st TP	left	29.4	2023-09-22	2023-09-29	62.03	1.62	59	22.48	male
14	M1	R2	Newton	1st TP	left	37.4	2023-09-22	2023-09-29	62.03	1.62	59	22.48	male
14	M1	R3	Newton	1st TP	left	34.3	2023-09-22	2023-09-29	62.03	1.62	59	22.48	male
14	M2	R1	Newton	1st MH	right	24.2	2023-09-22	2023-09-29	62.03	1.62	59	22.48	male
14	M2	R2	Newton	1st MH	right	33.8	2023-09-22	2023-09-29	62.03	1.62	59	22.48	male
14	M2	R3	Newton	1st MH	right	44.8	2023-09-22	2023-09-29	62.03	1.62	59	22.48	male
14	M2	R1	Newton	5th MH	right	52.3	2023-09-22	2023-09-29	62.03	1.62	59	22.48	male
14	M2	R2	Newton	5th MH	right	58.5	2023-09-22	2023-09-29	62.03	1.62	59	22.48	male
14	M2	R3	Newton	5th MH	right	60.7	2023-09-22	2023-09-29	62.03	1.62	59	22.48	male
14	M2	R1	Newton	Heel	right	65.1	2023-09-22	2023-09-29	62.03	1.62	59	22.48	male
14	M2	R2	Newton	Heel	right	69.9	2023-09-22	2023-09-29	62.03	1.62	59	22.48	male
14	M2	R3	Newton	Heel	right	68.6	2023-09-22	2023-09-29	62.03	1.62	59	22.48	male
14	M2	R1	Newton	1st TP	right	23.3	2023-09-22	2023-09-29	62.03	1.62	59	22.48	male
14	M2	R2	Newton	1st TP	right	41.3	2023-09-22	2023-09-29	62.03	1.62	59	22.48	male
14	M2	R3	Newton	1st TP	right	44.4	2023-09-22	2023-09-29	62.03	1.62	59	22.48	male
14	M2	R1	Newton	1st MH	left	37.4	2023-09-22	2023-09-29	62.03	1.62	59	22.48	male
14	M2	R2	Newton	1st MH	left	41.8	2023-09-22	2023-09-29	62.03	1.62	59	22.48	male
14	M2	R3	Newton	1st MH	left	47	2023-09-22	2023-09-29	62.03	1.62	59	22.48	male
14	M2	R1	Newton	5th MH	left	56.7	2023-09-22	2023-09-29	62.03	1.62	59	22.48	male
14	M2	R2	Newton	5th MH	left	58.5	2023-09-22	2023-09-29	62.03	1.62	59	22.48	male
14	M2	R3	Newton	5th MH	left	57.6	2023-09-22	2023-09-29	62.03	1.62	59	22.48	male
14	M2	R1	Newton	Heel	left	78.7	2023-09-22	2023-09-29	62.03	1.62	59	22.48	male
14	M2	R2	Newton	Heel	left	77.4	2023-09-22	2023-09-29	62.03	1.62	59	22.48	male
14	M2	R3	Newton	Heel	left	69.5	2023-09-22	2023-09-29	62.03	1.62	59	22.48	male
14	M2	R1	Newton	1st TP	left	35.2	2023-09-22	2023-09-29	62.03	1.62	59	22.48	male
14	M2	R2	Newton	1st TP	left	40.9	2023-09-22	2023-09-29	62.03	1.62	59	22.48	male
14	M2	R3	Newton	1st TP	left	41.8	2023-09-22	2023-09-29	62.03	1.62	59	22.48	male
14	M3	R1	Newton	1st MH	right	39.6	2023-09-22	2023-09-29	62.03	1.62	59	22.48	male
14	M3	R2	Newton	1st MH	right	44	2023-09-22	2023-09-29	62.03	1.62	59	22.48	male
14	M3	R3	Newton	1st MH	right	47.9	2023-09-22	2023-09-29	62.03	1.62	59	22.48	male
14	M3	R1	Newton	5th MH	right	53.2	2023-09-22	2023-09-29	62.03	1.62	59	22.48	male
14	M3	R2	Newton	5th MH	right	58	2023-09-22	2023-09-29	62.03	1.62	59	22.48	male
14	M3	R3	Newton	5th MH	right	57.6	2023-09-22	2023-09-29	62.03	1.62	59	22.48	male
14	M3	R1	Newton	Heel	right	64.2	2023-09-22	2023-09-29	62.03	1.62	59	22.48	male
14	M3	R2	Newton	Heel	right	61.1	2023-09-22	2023-09-29	62.03	1.62	59	22.48	male
14	M3	R3	Newton	Heel	right	66	2023-09-22	2023-09-29	62.03	1.62	59	22.48	male
14	M3	R1	Newton	1st TP	right	47.9	2023-09-22	2023-09-29	62.03	1.62	59	22.48	male
14	M3	R2	Newton	1st TP	right	48.8	2023-09-22	2023-09-29	62.03	1.62	59	22.48	male
14	M3	R3	Newton	1st TP	right	51	2023-09-22	2023-09-29	62.03	1.62	59	22.48	male
14	M3	R1	Newton	1st MH	left	46.2	2023-09-22	2023-09-29	62.03	1.62	59	22.48	male
14	M3	R2	Newton	1st MH	left	42.2	2023-09-22	2023-09-29	62.03	1.62	59	22.48	male
14	M3	R3	Newton	1st MH	left	44.8	2023-09-22	2023-09-29	62.03	1.62	59	22.48	male
14	M3	R1	Newton	5th MH	left	59.2	2023-09-22	2023-09-29	62.03	1.62	59	22.48	male
14	M3	R2	Newton	5th MH	left	56.3	2023-09-22	2023-09-29	62.03	1.62	59	22.48	male
14	M3	R3	Newton	5th MH	left	58.9	2023-09-22	2023-09-29	62.03	1.62	59	22.48	male
14	M3	R1	Newton	Heel	left	67.7	2023-09-22	2023-09-29	62.03	1.62	59	22.48	male
14	M3	R2	Newton	Heel	left	72.1	2023-09-22	2023-09-29	62.03	1.62	59	22.48	male
14	M3	R3	Newton	Heel	left	65.1	2023-09-22	2023-09-29	62.03	1.62	59	22.48	male
14	M3	R1	Newton	1st TP	left	48.4	2023-09-22	2023-09-29	62.03	1.62	59	22.48	male
14	M3	R2	Newton	1st TP	left	49.2	2023-09-22	2023-09-29	62.03	1.62	59	22.48	male
14	M3	R3	Newton	1st TP	left	52.3	2023-09-22	2023-09-29	62.03	1.62	59	22.48	male
15	M1	R1	Newton	1st MH	right	57.6	2023-09-22	2023-09-29	54.53	1.57	66	26.77	female
15	M1	R2	Newton	1st MH	right	84	2023-09-22	2023-09-29	54.53	1.57	66	26.77	female
15	M1	R3	Newton	1st MH	right	70.4	2023-09-22	2023-09-29	54.53	1.57	66	26.77	female
15	M1	R1	Newton	5th MH	right	59.8	2023-09-22	2023-09-29	54.53	1.57	66	26.77	female
15	M1	R2	Newton	5th MH	right	76.5	2023-09-22	2023-09-29	54.53	1.57	66	26.77	female
15	M1	R3	Newton	5th MH	right	66	2023-09-22	2023-09-29	54.53	1.57	66	26.77	female
15	M1	R1	Newton	Heel	right	81.4	2023-09-22	2023-09-29	54.53	1.57	66	26.77	female
15	M1	R2	Newton	Heel	right	90.2	2023-09-22	2023-09-29	54.53	1.57	66	26.77	female
15	M1	R3	Newton	Heel	right	82.2	2023-09-22	2023-09-29	54.53	1.57	66	26.77	female
15	M1	R1	Newton	1st TP	right	35.2	2023-09-22	2023-09-29	54.53	1.57	66	26.77	female
15	M1	R2	Newton	1st TP	right	39.6	2023-09-22	2023-09-29	54.53	1.57	66	26.77	female
15	M1	R3	Newton	1st TP	right	47.5	2023-09-22	2023-09-29	54.53	1.57	66	26.77	female
15	M1	R1	Newton	1st MH	left	66.8	2023-09-22	2023-09-29	54.53	1.57	66	26.77	female
15	M1	R2	Newton	1st MH	left	69	2023-09-22	2023-09-29	54.53	1.57	66	26.77	female
15	M1	R3	Newton	1st MH	left	65.1	2023-09-22	2023-09-29	54.53	1.57	66	26.77	female
15	M1	R1	Newton	5th MH	left	69.5	2023-09-22	2023-09-29	54.53	1.57	66	26.77	female
15	M1	R2	Newton	5th MH	left	74.8	2023-09-22	2023-09-29	54.53	1.57	66	26.77	female
15	M1	R3	Newton	5th MH	left	74.8	2023-09-22	2023-09-29	54.53	1.57	66	26.77	female
15	M1	R1	Newton	Heel	left	73	2023-09-22	2023-09-29	54.53	1.57	66	26.77	female
15	M1	R2	Newton	Heel	left	71.7	2023-09-22	2023-09-29	54.53	1.57	66	26.77	female
15	M1	R3	Newton	Heel	left	70.8	2023-09-22	2023-09-29	54.53	1.57	66	26.77	female
15	M1	R1	Newton	1st TP	left	42.6	2023-09-22	2023-09-29	54.53	1.57	66	26.77	female
15	M1	R2	Newton	1st TP	left	42.6	2023-09-22	2023-09-29	54.53	1.57	66	26.77	female
15	M1	R3	Newton	1st TP	left	49.7	2023-09-22	2023-09-29	54.53	1.57	66	26.77	female
15	M2	R1	Newton	1st MH	right	62.9	2023-09-22	2023-09-29	54.53	1.57	66	26.77	female
15	M2	R2	Newton	1st MH	right	69.9	2023-09-22	2023-09-29	54.53	1.57	66	26.77	female
15	M2	R3	Newton	1st MH	right	71.2	2023-09-22	2023-09-29	54.53	1.57	66	26.77	female
15	M2	R1	Newton	5th MH	right	46.6	2023-09-22	2023-09-29	54.53	1.57	66	26.77	female
15	M2	R2	Newton	5th MH	right	50.6	2023-09-22	2023-09-29	54.53	1.57	66	26.77	female
15	M2	R3	Newton	5th MH	right	62.4	2023-09-22	2023-09-29	54.53	1.57	66	26.77	female
15	M2	R1	Newton	Heel	right	84	2023-09-22	2023-09-29	54.53	1.57	66	26.77	female
15	M2	R2	Newton	Heel	right	93.7	2023-09-22	2023-09-29	54.53	1.57	66	26.77	female
15	M2	R3	Newton	Heel	right	87.1	2023-09-22	2023-09-29	54.53	1.57	66	26.77	female
15	M2	R1	Newton	1st TP	right	43.5	2023-09-22	2023-09-29	54.53	1.57	66	26.77	female
15	M2	R2	Newton	1st TP	right	55.8	2023-09-22	2023-09-29	54.53	1.57	66	26.77	female
15	M2	R3	Newton	1st TP	right	57.6	2023-09-22	2023-09-29	54.53	1.57	66	26.77	female
15	M2	R1	Newton	1st MH	left	62.9	2023-09-22	2023-09-29	54.53	1.57	66	26.77	female
15	M2	R2	Newton	1st MH	left	62.4	2023-09-22	2023-09-29	54.53	1.57	66	26.77	female
15	M2	R3	Newton	1st MH	left	66	2023-09-22	2023-09-29	54.53	1.57	66	26.77	female
15	M2	R1	Newton	5th MH	left	58.5	2023-09-22	2023-09-29	54.53	1.57	66	26.77	female
15	M2	R2	Newton	5th MH	left	51.4	2023-09-22	2023-09-29	54.53	1.57	66	26.77	female
15	M2	R3	Newton	5th MH	left	66.8	2023-09-22	2023-09-29	54.53	1.57	66	26.77	female
15	M2	R1	Newton	Heel	left	90.2	2023-09-22	2023-09-29	54.53	1.57	66	26.77	female
15	M2	R2	Newton	Heel	left	77.8	2023-09-22	2023-09-29	54.53	1.57	66	26.77	female
15	M2	R3	Newton	Heel	left	75.2	2023-09-22	2023-09-29	54.53	1.57	66	26.77	female
15	M2	R1	Newton	1st TP	left	56.7	2023-09-22	2023-09-29	54.53	1.57	66	26.77	female
15	M2	R2	Newton	1st TP	left	54.1	2023-09-22	2023-09-29	54.53	1.57	66	26.77	female
15	M2	R3	Newton	1st TP	left	52.3	2023-09-22	2023-09-29	54.53	1.57	66	26.77	female
15	M3	R1	Newton	1st MH	right	76.5	2023-09-22	2023-09-29	54.53	1.57	66	26.77	female
15	M3	R2	Newton	1st MH	right	69.5	2023-09-22	2023-09-29	54.53	1.57	66	26.77	female
15	M3	R3	Newton	1st MH	right	72.1	2023-09-22	2023-09-29	54.53	1.57	66	26.77	female
15	M3	R1	Newton	5th MH	right	61.1	2023-09-22	2023-09-29	54.53	1.57	66	26.77	female
15	M3	R2	Newton	5th MH	right	62.4	2023-09-22	2023-09-29	54.53	1.57	66	26.77	female
15	M3	R3	Newton	5th MH	right	61.6	2023-09-22	2023-09-29	54.53	1.57	66	26.77	female
15	M3	R1	Newton	Heel	right	88	2023-09-22	2023-09-29	54.53	1.57	66	26.77	female
15	M3	R2	Newton	Heel	right	76.5	2023-09-22	2023-09-29	54.53	1.57	66	26.77	female
15	M3	R3	Newton	Heel	right	89.3	2023-09-22	2023-09-29	54.53	1.57	66	26.77	female
15	M3	R1	Newton	1st TP	right	56.3	2023-09-22	2023-09-29	54.53	1.57	66	26.77	female
15	M3	R2	Newton	1st TP	right	45.7	2023-09-22	2023-09-29	54.53	1.57	66	26.77	female
15	M3	R3	Newton	1st TP	right	44.7	2023-09-22	2023-09-29	54.53	1.57	66	26.77	female
15	M3	R1	Newton	1st MH	left	72.1	2023-09-22	2023-09-29	54.53	1.57	66	26.77	female
15	M3	R2	Newton	1st MH	left	74.3	2023-09-22	2023-09-29	54.53	1.57	66	26.77	female
15	M3	R3	Newton	1st MH	left	69.5	2023-09-22	2023-09-29	54.53	1.57	66	26.77	female
15	M3	R1	Newton	5th MH	left	61.6	2023-09-22	2023-09-29	54.53	1.57	66	26.77	female
15	M3	R2	Newton	5th MH	left	61.6	2023-09-22	2023-09-29	54.53	1.57	66	26.77	female
15	M3	R3	Newton	5th MH	left	64.6	2023-09-22	2023-09-29	54.53	1.57	66	26.77	female
15	M3	R1	Newton	Heel	left	72.1	2023-09-22	2023-09-29	54.53	1.57	66	26.77	female
15	M3	R2	Newton	Heel	left	84.4	2023-09-22	2023-09-29	54.53	1.57	66	26.77	female
15	M3	R3	Newton	Heel	left	89.7	2023-09-22	2023-09-29	54.53	1.57	66	26.77	female
15	M3	R1	Newton	1st TP	left	48.8	2023-09-22	2023-09-29	54.53	1.57	66	26.77	female
15	M3	R2	Newton	1st TP	left	47.9	2023-09-22	2023-09-29	54.53	1.57	66	26.77	female
15	M3	R3	Newton	1st TP	left	44.8	2023-09-22	2023-09-29	54.53	1.57	66	26.77	female
16	M1	R1	Newton	1st MH	right	110	2023-09-22	2023-09-29	66.63	1.68	70	24.8	male
16	M1	R2	Newton	1st MH	right	110	2023-09-22	2023-09-29	66.63	1.68	70	24.8	male
16	M1	R3	Newton	1st MH	right	107	2023-09-22	2023-09-29	66.63	1.68	70	24.8	male
16	M1	R1	Newton	5th MH	right	110	2023-09-22	2023-09-29	66.63	1.68	70	24.8	male
16	M1	R2	Newton	5th MH	right	110	2023-09-22	2023-09-29	66.63	1.68	70	24.8	male
16	M1	R3	Newton	5th MH	right	110	2023-09-22	2023-09-29	66.63	1.68	70	24.8	male
16	M1	R1	Newton	Heel	right	110	2023-09-22	2023-09-29	66.63	1.68	70	24.8	male
16	M1	R2	Newton	Heel	right	110	2023-09-22	2023-09-29	66.63	1.68	70	24.8	male
16	M1	R3	Newton	Heel	right	110	2023-09-22	2023-09-29	66.63	1.68	70	24.8	male
16	M1	R1	Newton	1st TP	right	38.2	2023-09-22	2023-09-29	66.63	1.68	70	24.8	male
16	M1	R2	Newton	1st TP	right	22.8	2023-09-22	2023-09-29	66.63	1.68	70	24.8	male
16	M1	R3	Newton	1st TP	right	30.3	2023-09-22	2023-09-29	66.63	1.68	70	24.8	male
16	M1	R1	Newton	1st MH	left	110	2023-09-22	2023-09-29	66.63	1.68	70	24.8	male
16	M1	R2	Newton	1st MH	left	110	2023-09-22	2023-09-29	66.63	1.68	70	24.8	male
16	M1	R3	Newton	1st MH	left	93.2	2023-09-22	2023-09-29	66.63	1.68	70	24.8	male
16	M1	R1	Newton	5th MH	left	110	2023-09-22	2023-09-29	66.63	1.68	70	24.8	male
16	M1	R2	Newton	5th MH	left	110	2023-09-22	2023-09-29	66.63	1.68	70	24.8	male
16	M1	R3	Newton	5th MH	left	110	2023-09-22	2023-09-29	66.63	1.68	70	24.8	male
16	M1	R1	Newton	Heel	left	110	2023-09-22	2023-09-29	66.63	1.68	70	24.8	male
16	M1	R2	Newton	Heel	left	110	2023-09-22	2023-09-29	66.63	1.68	70	24.8	male
16	M1	R3	Newton	Heel	left	110	2023-09-22	2023-09-29	66.63	1.68	70	24.8	male
16	M1	R1	Newton	1st TP	left	41.3	2023-09-22	2023-09-29	66.63	1.68	70	24.8	male
16	M1	R2	Newton	1st TP	left	34.7	2023-09-22	2023-09-29	66.63	1.68	70	24.8	male
16	M1	R3	Newton	1st TP	left	25.9	2023-09-22	2023-09-29	66.63	1.68	70	24.8	male
16	M2	R1	Newton	1st MH	right	84.4	2023-09-22	2023-09-29	66.63	1.68	70	24.8	male
16	M2	R2	Newton	1st MH	right	102	2023-09-22	2023-09-29	66.63	1.68	70	24.8	male
16	M2	R3	Newton	1st MH	right	106	2023-09-22	2023-09-29	66.63	1.68	70	24.8	male
16	M2	R1	Newton	5th MH	right	99.8	2023-09-22	2023-09-29	66.63	1.68	70	24.8	male
16	M2	R2	Newton	5th MH	right	98.5	2023-09-22	2023-09-29	66.63	1.68	70	24.8	male
16	M2	R3	Newton	5th MH	right	80	2023-09-22	2023-09-29	66.63	1.68	70	24.8	male
16	M2	R1	Newton	Heel	right	110	2023-09-22	2023-09-29	66.63	1.68	70	24.8	male
16	M2	R2	Newton	Heel	right	110	2023-09-22	2023-09-29	66.63	1.68	70	24.8	male
16	M2	R3	Newton	Heel	right	110	2023-09-22	2023-09-29	66.63	1.68	70	24.8	male
16	M2	R1	Newton	1st TP	right	26.4	2023-09-22	2023-09-29	66.63	1.68	70	24.8	male
16	M2	R2	Newton	1st TP	right	36.5	2023-09-22	2023-09-29	66.63	1.68	70	24.8	male
16	M2	R3	Newton	1st TP	right	33.4	2023-09-22	2023-09-29	66.63	1.68	70	24.8	male
16	M2	R1	Newton	1st MH	left	82.2	2023-09-22	2023-09-29	66.63	1.68	70	24.8	male
16	M2	R2	Newton	1st MH	left	82.7	2023-09-22	2023-09-29	66.63	1.68	70	24.8	male
16	M2	R3	Newton	1st MH	left	82.7	2023-09-22	2023-09-29	66.63	1.68	70	24.8	male
16	M2	R1	Newton	5th MH	left	95.4	2023-09-22	2023-09-29	66.63	1.68	70	24.8	male
16	M2	R2	Newton	5th MH	left	76.1	2023-09-22	2023-09-29	66.63	1.68	70	24.8	male
16	M2	R3	Newton	5th MH	left	76.5	2023-09-22	2023-09-29	66.63	1.68	70	24.8	male
16	M2	R1	Newton	Heel	left	110	2023-09-22	2023-09-29	66.63	1.68	70	24.8	male
16	M2	R2	Newton	Heel	left	110	2023-09-22	2023-09-29	66.63	1.68	70	24.8	male
16	M2	R3	Newton	Heel	left	110	2023-09-22	2023-09-29	66.63	1.68	70	24.8	male
16	M2	R1	Newton	1st TP	left	44.4	2023-09-22	2023-09-29	66.63	1.68	70	24.8	male
16	M2	R2	Newton	1st TP	left	37.8	2023-09-22	2023-09-29	66.63	1.68	70	24.8	male
16	M2	R3	Newton	1st TP	left	40.9	2023-09-22	2023-09-29	66.63	1.68	70	24.8	male
16	M3	R1	Newton	1st MH	right	94.6	2023-09-22	2023-09-29	66.63	1.68	70	24.8	male
16	M3	R2	Newton	1st MH	right	92.8	2023-09-22	2023-09-29	66.63	1.68	70	24.8	male
16	M3	R3	Newton	1st MH	right	88	2023-09-22	2023-09-29	66.63	1.68	70	24.8	male
16	M3	R1	Newton	5th MH	right	105	2023-09-22	2023-09-29	66.63	1.68	70	24.8	male
16	M3	R2	Newton	5th MH	right	107	2023-09-22	2023-09-29	66.63	1.68	70	24.8	male
16	M3	R3	Newton	5th MH	right	110	2023-09-22	2023-09-29	66.63	1.68	70	24.8	male
16	M3	R1	Newton	Heel	right	110	2023-09-22	2023-09-29	66.63	1.68	70	24.8	male
16	M3	R2	Newton	Heel	right	110	2023-09-22	2023-09-29	66.63	1.68	70	24.8	male
16	M3	R3	Newton	Heel	right	110	2023-09-22	2023-09-29	66.63	1.68	70	24.8	male
16	M3	R1	Newton	1st TP	right	58.9	2023-09-22	2023-09-29	66.63	1.68	70	24.8	male
16	M3	R2	Newton	1st TP	right	46.6	2023-09-22	2023-09-29	66.63	1.68	70	24.8	male
16	M3	R3	Newton	1st TP	right	45.7	2023-09-22	2023-09-29	66.63	1.68	70	24.8	male
16	M3	R1	Newton	1st MH	left	90.2	2023-09-22	2023-09-29	66.63	1.68	70	24.8	male
16	M3	R2	Newton	1st MH	left	95.4	2023-09-22	2023-09-29	66.63	1.68	70	24.8	male
16	M3	R3	Newton	1st MH	left	91.5	2023-09-22	2023-09-29	66.63	1.68	70	24.8	male
16	M3	R1	Newton	5th MH	left	110	2023-09-22	2023-09-29	66.63	1.68	70	24.8	male
16	M3	R2	Newton	5th MH	left	107	2023-09-22	2023-09-29	66.63	1.68	70	24.8	male
16	M3	R3	Newton	5th MH	left	110	2023-09-22	2023-09-29	66.63	1.68	70	24.8	male
16	M3	R1	Newton	Heel	left	110	2023-09-22	2023-09-29	66.63	1.68	70	24.8	male
16	M3	R2	Newton	Heel	left	110	2023-09-22	2023-09-29	66.63	1.68	70	24.8	male
16	M3	R3	Newton	Heel	left	110	2023-09-22	2023-09-29	66.63	1.68	70	24.8	male
16	M3	R1	Newton	1st TP	left	51	2023-09-22	2023-09-29	66.63	1.68	70	24.8	male
16	M3	R2	Newton	1st TP	left	49.7	2023-09-22	2023-09-29	66.63	1.68	70	24.8	male
16	M3	R3	Newton	1st TP	left	49.7	2023-09-22	2023-09-29	66.63	1.68	70	24.8	male
17	M1	R1	Newton	1st MH	right	41.8	2023-09-22	2023-09-29	58.06	1.68	85	30.12	female
17	M1	R2	Newton	1st MH	right	62.9	2023-09-22	2023-09-29	58.06	1.68	85	30.12	female
17	M1	R3	Newton	1st MH	right	51.9	2023-09-22	2023-09-29	58.06	1.68	85	30.12	female
17	M1	R1	Newton	5th MH	right	33	2023-09-22	2023-09-29	58.06	1.68	85	30.12	female
17	M1	R2	Newton	5th MH	right	34.7	2023-09-22	2023-09-29	58.06	1.68	85	30.12	female
17	M1	R3	Newton	5th MH	right	53.6	2023-09-22	2023-09-29	58.06	1.68	85	30.12	female
17	M1	R1	Newton	Heel	right	89.7	2023-09-22	2023-09-29	58.06	1.68	85	30.12	female
17	M1	R2	Newton	Heel	right	110	2023-09-22	2023-09-29	58.06	1.68	85	30.12	female
17	M1	R3	Newton	Heel	right	101	2023-09-22	2023-09-29	58.06	1.68	85	30.12	female
17	M1	R1	Newton	1st TP	right	28.1	2023-09-22	2023-09-29	58.06	1.68	85	30.12	female
17	M1	R2	Newton	1st TP	right	38.7	2023-09-22	2023-09-29	58.06	1.68	85	30.12	female
17	M1	R3	Newton	1st TP	right	38.2	2023-09-22	2023-09-29	58.06	1.68	85	30.12	female
17	M1	R1	Newton	1st MH	left	75.6	2023-09-22	2023-09-29	58.06	1.68	85	30.12	female
17	M1	R2	Newton	1st MH	left	48.4	2023-09-22	2023-09-29	58.06	1.68	85	30.12	female
17	M1	R3	Newton	1st MH	left	60.7	2023-09-22	2023-09-29	58.06	1.68	85	30.12	female
17	M1	R1	Newton	5th MH	left	59.4	2023-09-22	2023-09-29	58.06	1.68	85	30.12	female
17	M1	R2	Newton	5th MH	left	77.4	2023-09-22	2023-09-29	58.06	1.68	85	30.12	female
17	M1	R3	Newton	5th MH	left	62.4	2023-09-22	2023-09-29	58.06	1.68	85	30.12	female
17	M1	R1	Newton	Heel	left	93.7	2023-09-22	2023-09-29	58.06	1.68	85	30.12	female
17	M1	R2	Newton	Heel	left	108	2023-09-22	2023-09-29	58.06	1.68	85	30.12	female
17	M1	R3	Newton	Heel	left	102	2023-09-22	2023-09-29	58.06	1.68	85	30.12	female
17	M1	R1	Newton	1st TP	left	36.9	2023-09-22	2023-09-29	58.06	1.68	85	30.12	female
17	M1	R2	Newton	1st TP	left	36.9	2023-09-22	2023-09-29	58.06	1.68	85	30.12	female
17	M1	R3	Newton	1st TP	left	47	2023-09-22	2023-09-29	58.06	1.68	85	30.12	female
17	M2	R1	Newton	1st MH	right	49.7	2023-09-22	2023-09-29	58.06	1.68	85	30.12	female
17	M2	R2	Newton	1st MH	right	36.9	2023-09-22	2023-09-29	58.06	1.68	85	30.12	female
17	M2	R3	Newton	1st MH	right	53.2	2023-09-22	2023-09-29	58.06	1.68	85	30.12	female
17	M2	R1	Newton	5th MH	right	34.7	2023-09-22	2023-09-29	58.06	1.68	85	30.12	female
17	M2	R2	Newton	5th MH	right	56.7	2023-09-22	2023-09-29	58.06	1.68	85	30.12	female
17	M2	R3	Newton	5th MH	right	63.8	2023-09-22	2023-09-29	58.06	1.68	85	30.12	female
17	M2	R1	Newton	Heel	right	67.3	2023-09-22	2023-09-29	58.06	1.68	85	30.12	female
17	M2	R2	Newton	Heel	right	68.6	2023-09-22	2023-09-29	58.06	1.68	85	30.12	female
17	M2	R3	Newton	Heel	right	63.3	2023-09-22	2023-09-29	58.06	1.68	85	30.12	female
17	M2	R1	Newton	1st TP	right	27.2	2023-09-22	2023-09-29	58.06	1.68	85	30.12	female
17	M2	R2	Newton	1st TP	right	33.4	2023-09-22	2023-09-29	58.06	1.68	85	30.12	female
17	M2	R3	Newton	1st TP	right	37.8	2023-09-22	2023-09-29	58.06	1.68	85	30.12	female
17	M2	R1	Newton	1st MH	left	35.2	2023-09-22	2023-09-29	58.06	1.68	85	30.12	female
17	M2	R2	Newton	1st MH	left	38.2	2023-09-22	2023-09-29	58.06	1.68	85	30.12	female
17	M2	R3	Newton	1st MH	left	31.6	2023-09-22	2023-09-29	58.06	1.68	85	30.12	female
17	M2	R1	Newton	5th MH	left	62.9	2023-09-22	2023-09-29	58.06	1.68	85	30.12	female
17	M2	R2	Newton	5th MH	left	65.5	2023-09-22	2023-09-29	58.06	1.68	85	30.12	female
17	M2	R3	Newton	5th MH	left	68.6	2023-09-22	2023-09-29	58.06	1.68	85	30.12	female
17	M2	R1	Newton	Heel	left	66.8	2023-09-22	2023-09-29	58.06	1.68	85	30.12	female
17	M2	R2	Newton	Heel	left	63.8	2023-09-22	2023-09-29	58.06	1.68	85	30.12	female
17	M2	R3	Newton	Heel	left	65.5	2023-09-22	2023-09-29	58.06	1.68	85	30.12	female
17	M2	R1	Newton	1st TP	left	34.3	2023-09-22	2023-09-29	58.06	1.68	85	30.12	female
17	M2	R2	Newton	1st TP	left	34.7	2023-09-22	2023-09-29	58.06	1.68	85	30.12	female
17	M2	R3	Newton	1st TP	left	39.6	2023-09-22	2023-09-29	58.06	1.68	85	30.12	female
17	M3	R1	Newton	1st MH	right	41.3	2023-09-22	2023-09-29	58.06	1.68	85	30.12	female
17	M3	R2	Newton	1st MH	right	56.3	2023-09-22	2023-09-29	58.06	1.68	85	30.12	female
17	M3	R3	Newton	1st MH	right	57.6	2023-09-22	2023-09-29	58.06	1.68	85	30.12	female
17	M3	R1	Newton	5th MH	right	58	2023-09-22	2023-09-29	58.06	1.68	85	30.12	female
17	M3	R2	Newton	5th MH	right	53.2	2023-09-22	2023-09-29	58.06	1.68	85	30.12	female
17	M3	R3	Newton	5th MH	right	62.4	2023-09-22	2023-09-29	58.06	1.68	85	30.12	female
17	M3	R1	Newton	Heel	right	76.5	2023-09-22	2023-09-29	58.06	1.68	85	30.12	female
17	M3	R2	Newton	Heel	right	81.4	2023-09-22	2023-09-29	58.06	1.68	85	30.12	female
17	M3	R3	Newton	Heel	right	77	2023-09-22	2023-09-29	58.06	1.68	85	30.12	female
17	M3	R1	Newton	1st TP	right	22.4	2023-09-22	2023-09-29	58.06	1.68	85	30.12	female
17	M3	R2	Newton	1st TP	right	26.4	2023-09-22	2023-09-29	58.06	1.68	85	30.12	female
17	M3	R3	Newton	1st TP	right	29.9	2023-09-22	2023-09-29	58.06	1.68	85	30.12	female
17	M3	R1	Newton	1st MH	left	51	2023-09-22	2023-09-29	58.06	1.68	85	30.12	female
17	M3	R2	Newton	1st MH	left	55	2023-09-22	2023-09-29	58.06	1.68	85	30.12	female
17	M3	R3	Newton	1st MH	left	63.3	2023-09-22	2023-09-29	58.06	1.68	85	30.12	female
17	M3	R1	Newton	5th MH	left	66.4	2023-09-22	2023-09-29	58.06	1.68	85	30.12	female
17	M3	R2	Newton	5th MH	left	61.6	2023-09-22	2023-09-29	58.06	1.68	85	30.12	female
17	M3	R3	Newton	5th MH	left	58.9	2023-09-22	2023-09-29	58.06	1.68	85	30.12	female
17	M3	R1	Newton	Heel	left	81.8	2023-09-22	2023-09-29	58.06	1.68	85	30.12	female
17	M3	R2	Newton	Heel	left	81.8	2023-09-22	2023-09-29	58.06	1.68	85	30.12	female
17	M3	R3	Newton	Heel	left	85.8	2023-09-22	2023-09-29	58.06	1.68	85	30.12	female
17	M3	R1	Newton	1st TP	left	26.4	2023-09-22	2023-09-29	58.06	1.68	85	30.12	female
17	M3	R2	Newton	1st TP	left	25	2023-09-22	2023-09-29	58.06	1.68	85	30.12	female
17	M3	R3	Newton	1st TP	left	27.7	2023-09-22	2023-09-29	58.06	1.68	85	30.12	female
18	M1	R1	Newton	1st MH	right	58.9	2023-09-22	2023-09-29	65.93	1.62	96	36.58	female
18	M1	R2	Newton	1st MH	right	47.9	2023-09-22	2023-09-29	65.93	1.62	96	36.58	female
18	M1	R3	Newton	1st MH	right	52.3	2023-09-22	2023-09-29	65.93	1.62	96	36.58	female
18	M1	R1	Newton	5th MH	right	40.9	2023-09-22	2023-09-29	65.93	1.62	96	36.58	female
18	M1	R2	Newton	5th MH	right	45.3	2023-09-22	2023-09-29	65.93	1.62	96	36.58	female
18	M1	R3	Newton	5th MH	right	55.8	2023-09-22	2023-09-29	65.93	1.62	96	36.58	female
18	M1	R1	Newton	Heel	right	96.8	2023-09-22	2023-09-29	65.93	1.62	96	36.58	female
18	M1	R2	Newton	Heel	right	99	2023-09-22	2023-09-29	65.93	1.62	96	36.58	female
18	M1	R3	Newton	Heel	right	110	2023-09-22	2023-09-29	65.93	1.62	96	36.58	female
18	M1	R1	Newton	1st TP	right	34.3	2023-09-22	2023-09-29	65.93	1.62	96	36.58	female
18	M1	R2	Newton	1st TP	right	44.8	2023-09-22	2023-09-29	65.93	1.62	96	36.58	female
18	M1	R3	Newton	1st TP	right	42.6	2023-09-22	2023-09-29	65.93	1.62	96	36.58	female
18	M1	R1	Newton	1st MH	left	77	2023-09-22	2023-09-29	65.93	1.62	96	36.58	female
18	M1	R2	Newton	1st MH	left	68.6	2023-09-22	2023-09-29	65.93	1.62	96	36.58	female
18	M1	R3	Newton	1st MH	left	66	2023-09-22	2023-09-29	65.93	1.62	96	36.58	female
18	M1	R1	Newton	5th MH	left	53.6	2023-09-22	2023-09-29	65.93	1.62	96	36.58	female
18	M1	R2	Newton	5th MH	left	50.1	2023-09-22	2023-09-29	65.93	1.62	96	36.58	female
18	M1	R3	Newton	5th MH	left	58.9	2023-09-22	2023-09-29	65.93	1.62	96	36.58	female
18	M1	R1	Newton	Heel	left	110	2023-09-22	2023-09-29	65.93	1.62	96	36.58	female
18	M1	R2	Newton	Heel	left	110	2023-09-22	2023-09-29	65.93	1.62	96	36.58	female
18	M1	R3	Newton	Heel	left	110	2023-09-22	2023-09-29	65.93	1.62	96	36.58	female
18	M1	R1	Newton	1st TP	left	36.9	2023-09-22	2023-09-29	65.93	1.62	96	36.58	female
18	M1	R2	Newton	1st TP	left	47.5	2023-09-22	2023-09-29	65.93	1.62	96	36.58	female
18	M1	R3	Newton	1st TP	left	50.6	2023-09-22	2023-09-29	65.93	1.62	96	36.58	female
18	M2	R1	Newton	1st MH	right	29.4	2023-09-22	2023-09-29	65.93	1.62	96	36.58	female
18	M2	R2	Newton	1st MH	right	49.2	2023-09-22	2023-09-29	65.93	1.62	96	36.58	female
18	M2	R3	Newton	1st MH	right	41.8	2023-09-22	2023-09-29	65.93	1.62	96	36.58	female
18	M2	R1	Newton	5th MH	right	47	2023-09-22	2023-09-29	65.93	1.62	96	36.58	female
18	M2	R2	Newton	5th MH	right	57.2	2023-09-22	2023-09-29	65.93	1.62	96	36.58	female
18	M2	R3	Newton	5th MH	right	58.5	2023-09-22	2023-09-29	65.93	1.62	96	36.58	female
18	M2	R1	Newton	Heel	right	61.6	2023-09-22	2023-09-29	65.93	1.62	96	36.58	female
18	M2	R2	Newton	Heel	right	60.2	2023-09-22	2023-09-29	65.93	1.62	96	36.58	female
18	M2	R3	Newton	Heel	right	67.7	2023-09-22	2023-09-29	65.93	1.62	96	36.58	female
18	M2	R1	Newton	1st TP	right	33.4	2023-09-22	2023-09-29	65.93	1.62	96	36.58	female
18	M2	R2	Newton	1st TP	right	42.6	2023-09-22	2023-09-29	65.93	1.62	96	36.58	female
18	M2	R3	Newton	1st TP	right	37.8	2023-09-22	2023-09-29	65.93	1.62	96	36.58	female
18	M2	R1	Newton	1st MH	left	44.4	2023-09-22	2023-09-29	65.93	1.62	96	36.58	female
18	M2	R2	Newton	1st MH	left	52.3	2023-09-22	2023-09-29	65.93	1.62	96	36.58	female
18	M2	R3	Newton	1st MH	left	45.7	2023-09-22	2023-09-29	65.93	1.62	96	36.58	female
18	M2	R1	Newton	5th MH	left	58.5	2023-09-22	2023-09-29	65.93	1.62	96	36.58	female
18	M2	R2	Newton	5th MH	left	45.3	2023-09-22	2023-09-29	65.93	1.62	96	36.58	female
18	M2	R3	Newton	5th MH	left	55.4	2023-09-22	2023-09-29	65.93	1.62	96	36.58	female
18	M2	R1	Newton	Heel	left	62.4	2023-09-22	2023-09-29	65.93	1.62	96	36.58	female
18	M2	R2	Newton	Heel	left	62.4	2023-09-22	2023-09-29	65.93	1.62	96	36.58	female
18	M2	R3	Newton	Heel	left	66.8	2023-09-22	2023-09-29	65.93	1.62	96	36.58	female
18	M2	R1	Newton	1st TP	left	35.2	2023-09-22	2023-09-29	65.93	1.62	96	36.58	female
18	M2	R2	Newton	1st TP	left	39.1	2023-09-22	2023-09-29	65.93	1.62	96	36.58	female
18	M2	R3	Newton	1st TP	left	38.2	2023-09-22	2023-09-29	65.93	1.62	96	36.58	female
18	M3	R1	Newton	1st MH	right	51	2023-09-22	2023-09-29	65.93	1.62	96	36.58	female
18	M3	R2	Newton	1st MH	right	64.6	2023-09-22	2023-09-29	65.93	1.62	96	36.58	female
18	M3	R3	Newton	1st MH	right	62.9	2023-09-22	2023-09-29	65.93	1.62	96	36.58	female
18	M3	R1	Newton	5th MH	right	93.2	2023-09-22	2023-09-29	65.93	1.62	96	36.58	female
18	M3	R2	Newton	5th MH	right	94.1	2023-09-22	2023-09-29	65.93	1.62	96	36.58	female
18	M3	R3	Newton	5th MH	right	92.4	2023-09-22	2023-09-29	65.93	1.62	96	36.58	female
18	M3	R1	Newton	Heel	right	89.3	2023-09-22	2023-09-29	65.93	1.62	96	36.58	female
18	M3	R2	Newton	Heel	right	83.6	2023-09-22	2023-09-29	65.93	1.62	96	36.58	female
18	M3	R3	Newton	Heel	right	89.3	2023-09-22	2023-09-29	65.93	1.62	96	36.58	female
18	M3	R1	Newton	1st TP	right	47.9	2023-09-22	2023-09-29	65.93	1.62	96	36.58	female
18	M3	R2	Newton	1st TP	right	46.2	2023-09-22	2023-09-29	65.93	1.62	96	36.58	female
18	M3	R3	Newton	1st TP	right	48.8	2023-09-22	2023-09-29	65.93	1.62	96	36.58	female
18	M3	R1	Newton	1st MH	left	63.3	2023-09-22	2023-09-29	65.93	1.62	96	36.58	female
18	M3	R2	Newton	1st MH	left	63.8	2023-09-22	2023-09-29	65.93	1.62	96	36.58	female
18	M3	R3	Newton	1st MH	left	82.2	2023-09-22	2023-09-29	65.93	1.62	96	36.58	female
18	M3	R1	Newton	5th MH	left	87.1	2023-09-22	2023-09-29	65.93	1.62	96	36.58	female
18	M3	R2	Newton	5th MH	left	88	2023-09-22	2023-09-29	65.93	1.62	96	36.58	female
18	M3	R3	Newton	5th MH	left	73	2023-09-22	2023-09-29	65.93	1.62	96	36.58	female
18	M3	R1	Newton	Heel	left	81.4	2023-09-22	2023-09-29	65.93	1.62	96	36.58	female
18	M3	R2	Newton	Heel	left	84.9	2023-09-22	2023-09-29	65.93	1.62	96	36.58	female
18	M3	R3	Newton	Heel	left	85.3	2023-09-22	2023-09-29	65.93	1.62	96	36.58	female
18	M3	R1	Newton	1st TP	left	48.8	2023-09-22	2023-09-29	65.93	1.62	96	36.58	female
18	M3	R2	Newton	1st TP	left	51.4	2023-09-22	2023-09-29	65.93	1.62	96	36.58	female
18	M3	R3	Newton	1st TP	left	51	2023-09-22	2023-09-29	65.93	1.62	96	36.58	female
19	M1	R1	Newton	1st MH	right	65.1	2023-09-22	2023-09-29	72.15	1.66	92	33.38	male
19	M1	R2	Newton	1st MH	right	66.8	2023-09-22	2023-09-29	72.15	1.66	92	33.38	male
19	M1	R3	Newton	1st MH	right	59.4	2023-09-22	2023-09-29	72.15	1.66	92	33.38	male
19	M1	R1	Newton	5th MH	right	58.5	2023-09-22	2023-09-29	72.15	1.66	92	33.38	male
19	M1	R2	Newton	5th MH	right	58	2023-09-22	2023-09-29	72.15	1.66	92	33.38	male
19	M1	R3	Newton	5th MH	right	58.9	2023-09-22	2023-09-29	72.15	1.66	92	33.38	male
19	M1	R1	Newton	Heel	right	96.8	2023-09-22	2023-09-29	72.15	1.66	92	33.38	male
19	M1	R2	Newton	Heel	right	80.9	2023-09-22	2023-09-29	72.15	1.66	92	33.38	male
19	M1	R3	Newton	Heel	right	110	2023-09-22	2023-09-29	72.15	1.66	92	33.38	male
19	M1	R1	Newton	1st TP	right	33.8	2023-09-22	2023-09-29	72.15	1.66	92	33.38	male
19	M1	R2	Newton	1st TP	right	45.7	2023-09-22	2023-09-29	72.15	1.66	92	33.38	male
19	M1	R3	Newton	1st TP	right	42.2	2023-09-22	2023-09-29	72.15	1.66	92	33.38	male
19	M1	R1	Newton	1st MH	left	73	2023-09-22	2023-09-29	72.15	1.66	92	33.38	male
19	M1	R2	Newton	1st MH	left	64.6	2023-09-22	2023-09-29	72.15	1.66	92	33.38	male
19	M1	R3	Newton	1st MH	left	63.3	2023-09-22	2023-09-29	72.15	1.66	92	33.38	male
19	M1	R1	Newton	5th MH	left	74.8	2023-09-22	2023-09-29	72.15	1.66	92	33.38	male
19	M1	R2	Newton	5th MH	left	72.1	2023-09-22	2023-09-29	72.15	1.66	92	33.38	male
19	M1	R3	Newton	5th MH	left	57.6	2023-09-22	2023-09-29	72.15	1.66	92	33.38	male
19	M1	R1	Newton	Heel	left	93.7	2023-09-22	2023-09-29	72.15	1.66	92	33.38	male
19	M1	R2	Newton	Heel	left	80.5	2023-09-22	2023-09-29	72.15	1.66	92	33.38	male
19	M1	R3	Newton	Heel	left	69.9	2023-09-22	2023-09-29	72.15	1.66	92	33.38	male
19	M1	R1	Newton	1st TP	left	45.7	2023-09-22	2023-09-29	72.15	1.66	92	33.38	male
19	M1	R2	Newton	1st TP	left	40.9	2023-09-22	2023-09-29	72.15	1.66	92	33.38	male
19	M1	R3	Newton	1st TP	left	47	2023-09-22	2023-09-29	72.15	1.66	92	33.38	male
19	M2	R1	Newton	1st MH	right	59.8	2023-09-22	2023-09-29	72.15	1.66	92	33.38	male
19	M2	R2	Newton	1st MH	right	61.6	2023-09-22	2023-09-29	72.15	1.66	92	33.38	male
19	M2	R3	Newton	1st MH	right	73.9	2023-09-22	2023-09-29	72.15	1.66	92	33.38	male
19	M2	R1	Newton	5th MH	right	51.9	2023-09-22	2023-09-29	72.15	1.66	92	33.38	male
19	M2	R2	Newton	5th MH	right	57.6	2023-09-22	2023-09-29	72.15	1.66	92	33.38	male
19	M2	R3	Newton	5th MH	right	68.6	2023-09-22	2023-09-29	72.15	1.66	92	33.38	male
19	M2	R1	Newton	Heel	right	88.4	2023-09-22	2023-09-29	72.15	1.66	92	33.38	male
19	M2	R2	Newton	Heel	right	79.6	2023-09-22	2023-09-29	72.15	1.66	92	33.38	male
19	M2	R3	Newton	Heel	right	87.5	2023-09-22	2023-09-29	72.15	1.66	92	33.38	male
19	M2	R1	Newton	1st TP	right	48.8	2023-09-22	2023-09-29	72.15	1.66	92	33.38	male
19	M2	R2	Newton	1st TP	right	52.3	2023-09-22	2023-09-29	72.15	1.66	92	33.38	male
19	M2	R3	Newton	1st TP	right	55.4	2023-09-22	2023-09-29	72.15	1.66	92	33.38	male
19	M2	R1	Newton	1st MH	left	63.8	2023-09-22	2023-09-29	72.15	1.66	92	33.38	male
19	M2	R2	Newton	1st MH	left	70.4	2023-09-22	2023-09-29	72.15	1.66	92	33.38	male
19	M2	R3	Newton	1st MH	left	77.8	2023-09-22	2023-09-29	72.15	1.66	92	33.38	male
19	M2	R1	Newton	5th MH	left	110	2023-09-22	2023-09-29	72.15	1.66	92	33.38	male
19	M2	R2	Newton	5th MH	left	76.1	2023-09-22	2023-09-29	72.15	1.66	92	33.38	male
19	M2	R3	Newton	5th MH	left	69.9	2023-09-22	2023-09-29	72.15	1.66	92	33.38	male
19	M2	R1	Newton	Heel	left	69.9	2023-09-22	2023-09-29	72.15	1.66	92	33.38	male
19	M2	R2	Newton	Heel	left	110	2023-09-22	2023-09-29	72.15	1.66	92	33.38	male
19	M2	R3	Newton	Heel	left	86.6	2023-09-22	2023-09-29	72.15	1.66	92	33.38	male
19	M2	R1	Newton	1st TP	left	51.4	2023-09-22	2023-09-29	72.15	1.66	92	33.38	male
19	M2	R2	Newton	1st TP	left	62.4	2023-09-22	2023-09-29	72.15	1.66	92	33.38	male
19	M2	R3	Newton	1st TP	left	61.1	2023-09-22	2023-09-29	72.15	1.66	92	33.38	male
19	M3	R1	Newton	1st MH	right	60.7	2023-09-22	2023-09-29	72.15	1.66	92	33.38	male
19	M3	R2	Newton	1st MH	right	66.4	2023-09-22	2023-09-29	72.15	1.66	92	33.38	male
19	M3	R3	Newton	1st MH	right	65.1	2023-09-22	2023-09-29	72.15	1.66	92	33.38	male
19	M3	R1	Newton	5th MH	right	73.9	2023-09-22	2023-09-29	72.15	1.66	92	33.38	male
19	M3	R2	Newton	5th MH	right	83.6	2023-09-22	2023-09-29	72.15	1.66	92	33.38	male
19	M3	R3	Newton	5th MH	right	74.3	2023-09-22	2023-09-29	72.15	1.66	92	33.38	male
19	M3	R1	Newton	Heel	right	110	2023-09-22	2023-09-29	72.15	1.66	92	33.38	male
19	M3	R2	Newton	Heel	right	104	2023-09-22	2023-09-29	72.15	1.66	92	33.38	male
19	M3	R3	Newton	Heel	right	99.4	2023-09-22	2023-09-29	72.15	1.66	92	33.38	male
19	M3	R1	Newton	1st TP	right	60.2	2023-09-22	2023-09-29	72.15	1.66	92	33.38	male
19	M3	R2	Newton	1st TP	right	58	2023-09-22	2023-09-29	72.15	1.66	92	33.38	male
19	M3	R3	Newton	1st TP	right	53.6	2023-09-22	2023-09-29	72.15	1.66	92	33.38	male
19	M3	R1	Newton	1st MH	left	77.4	2023-09-22	2023-09-29	72.15	1.66	92	33.38	male
19	M3	R2	Newton	1st MH	left	66	2023-09-22	2023-09-29	72.15	1.66	92	33.38	male
19	M3	R3	Newton	1st MH	left	67.3	2023-09-22	2023-09-29	72.15	1.66	92	33.38	male
19	M3	R1	Newton	5th MH	left	79.6	2023-09-22	2023-09-29	72.15	1.66	92	33.38	male
19	M3	R2	Newton	5th MH	left	86.6	2023-09-22	2023-09-29	72.15	1.66	92	33.38	male
19	M3	R3	Newton	5th MH	left	80.9	2023-09-22	2023-09-29	72.15	1.66	92	33.38	male
19	M3	R1	Newton	Heel	left	107	2023-09-22	2023-09-29	72.15	1.66	92	33.38	male
19	M3	R2	Newton	Heel	left	108	2023-09-22	2023-09-29	72.15	1.66	92	33.38	male
19	M3	R3	Newton	Heel	left	110	2023-09-22	2023-09-29	72.15	1.66	92	33.38	male
19	M3	R1	Newton	1st TP	left	58.9	2023-09-22	2023-09-29	72.15	1.66	92	33.38	male
19	M3	R2	Newton	1st TP	left	58	2023-09-22	2023-09-29	72.15	1.66	92	33.38	male
19	M3	R3	Newton	1st TP	left	54.5	2023-09-22	2023-09-29	72.15	1.66	92	33.38	male
20	M1	R1	Newton	1st MH	right	58	2023-09-22	2023-09-29	61.38	1.67	66	23.66	male
20	M1	R2	Newton	1st MH	right	56.3	2023-09-22	2023-09-29	61.38	1.67	66	23.66	male
20	M1	R3	Newton	1st MH	right	68.6	2023-09-22	2023-09-29	61.38	1.67	66	23.66	male
20	M1	R1	Newton	5th MH	right	51	2023-09-22	2023-09-29	61.38	1.67	66	23.66	male
20	M1	R2	Newton	5th MH	right	61.1	2023-09-22	2023-09-29	61.38	1.67	66	23.66	male
20	M1	R3	Newton	5th MH	right	73	2023-09-22	2023-09-29	61.38	1.67	66	23.66	male
20	M1	R1	Newton	Heel	right	78.3	2023-09-22	2023-09-29	61.38	1.67	66	23.66	male
20	M1	R2	Newton	Heel	right	80.5	2023-09-22	2023-09-29	61.38	1.67	66	23.66	male
20	M1	R3	Newton	Heel	right	83.1	2023-09-22	2023-09-29	61.38	1.67	66	23.66	male
20	M1	R1	Newton	1st TP	right	36	2023-09-22	2023-09-29	61.38	1.67	66	23.66	male
20	M1	R2	Newton	1st TP	right	44	2023-09-22	2023-09-29	61.38	1.67	66	23.66	male
20	M1	R3	Newton	1st TP	right	49.7	2023-09-22	2023-09-29	61.38	1.67	66	23.66	male
20	M1	R1	Newton	1st MH	left	72.1	2023-09-22	2023-09-29	61.38	1.67	66	23.66	male
20	M1	R2	Newton	1st MH	left	51	2023-09-22	2023-09-29	61.38	1.67	66	23.66	male
20	M1	R3	Newton	1st MH	left	65.5	2023-09-22	2023-09-29	61.38	1.67	66	23.66	male
20	M1	R1	Newton	5th MH	left	58	2023-09-22	2023-09-29	61.38	1.67	66	23.66	male
20	M1	R2	Newton	5th MH	left	64.2	2023-09-22	2023-09-29	61.38	1.67	66	23.66	male
20	M1	R3	Newton	5th MH	left	70.4	2023-09-22	2023-09-29	61.38	1.67	66	23.66	male
20	M1	R1	Newton	Heel	left	79.2	2023-09-22	2023-09-29	61.38	1.67	66	23.66	male
20	M1	R2	Newton	Heel	left	64.2	2023-09-22	2023-09-29	61.38	1.67	66	23.66	male
20	M1	R3	Newton	Heel	left	66	2023-09-22	2023-09-29	61.38	1.67	66	23.66	male
20	M1	R1	Newton	1st TP	left	43.1	2023-09-22	2023-09-29	61.38	1.67	66	23.66	male
20	M1	R2	Newton	1st TP	left	52.8	2023-09-22	2023-09-29	61.38	1.67	66	23.66	male
20	M1	R3	Newton	1st TP	left	56.3	2023-09-22	2023-09-29	61.38	1.67	66	23.66	male
20	M2	R1	Newton	1st MH	right	40.4	2023-09-22	2023-09-29	61.38	1.67	66	23.66	male
20	M2	R2	Newton	1st MH	right	56.7	2023-09-22	2023-09-29	61.38	1.67	66	23.66	male
20	M2	R3	Newton	1st MH	right	68.2	2023-09-22	2023-09-29	61.38	1.67	66	23.66	male
20	M2	R1	Newton	5th MH	right	65.1	2023-09-22	2023-09-29	61.38	1.67	66	23.66	male
20	M2	R2	Newton	5th MH	right	64.6	2023-09-22	2023-09-29	61.38	1.67	66	23.66	male
20	M2	R3	Newton	5th MH	right	70.4	2023-09-22	2023-09-29	61.38	1.67	66	23.66	male
20	M2	R1	Newton	Heel	right	76.5	2023-09-22	2023-09-29	61.38	1.67	66	23.66	male
20	M2	R2	Newton	Heel	right	72.6	2023-09-22	2023-09-29	61.38	1.67	66	23.66	male
20	M2	R3	Newton	Heel	right	74.8	2023-09-22	2023-09-29	61.38	1.67	66	23.66	male
20	M2	R1	Newton	1st TP	right	56.3	2023-09-22	2023-09-29	61.38	1.67	66	23.66	male
20	M2	R2	Newton	1st TP	right	50.1	2023-09-22	2023-09-29	61.38	1.67	66	23.66	male
20	M2	R3	Newton	1st TP	right	60.2	2023-09-22	2023-09-29	61.38	1.67	66	23.66	male
20	M2	R1	Newton	1st MH	left	70.4	2023-09-22	2023-09-29	61.38	1.67	66	23.66	male
20	M2	R2	Newton	1st MH	left	72.6	2023-09-22	2023-09-29	61.38	1.67	66	23.66	male
20	M2	R3	Newton	1st MH	left	73	2023-09-22	2023-09-29	61.38	1.67	66	23.66	male
20	M2	R1	Newton	5th MH	left	61.1	2023-09-22	2023-09-29	61.38	1.67	66	23.66	male
20	M2	R2	Newton	5th MH	left	75.2	2023-09-22	2023-09-29	61.38	1.67	66	23.66	male
20	M2	R3	Newton	5th MH	left	67.3	2023-09-22	2023-09-29	61.38	1.67	66	23.66	male
20	M2	R1	Newton	Heel	left	83.1	2023-09-22	2023-09-29	61.38	1.67	66	23.66	male
20	M2	R2	Newton	Heel	left	79.2	2023-09-22	2023-09-29	61.38	1.67	66	23.66	male
20	M2	R3	Newton	Heel	left	94.6	2023-09-22	2023-09-29	61.38	1.67	66	23.66	male
20	M2	R1	Newton	1st TP	left	61.6	2023-09-22	2023-09-29	61.38	1.67	66	23.66	male
20	M2	R2	Newton	1st TP	left	57.6	2023-09-22	2023-09-29	61.38	1.67	66	23.66	male
20	M2	R3	Newton	1st TP	left	52.3	2023-09-22	2023-09-29	61.38	1.67	66	23.66	male
20	M3	R1	Newton	1st MH	right	44	2023-09-22	2023-09-29	61.38	1.67	66	23.66	male
20	M3	R2	Newton	1st MH	right	49.2	2023-09-22	2023-09-29	61.38	1.67	66	23.66	male
20	M3	R3	Newton	1st MH	right	50.1	2023-09-22	2023-09-29	61.38	1.67	66	23.66	male
20	M3	R1	Newton	5th MH	right	65.1	2023-09-22	2023-09-29	61.38	1.67	66	23.66	male
20	M3	R2	Newton	5th MH	right	67.3	2023-09-22	2023-09-29	61.38	1.67	66	23.66	male
20	M3	R3	Newton	5th MH	right	62	2023-09-22	2023-09-29	61.38	1.67	66	23.66	male
20	M3	R1	Newton	Heel	right	71.2	2023-09-22	2023-09-29	61.38	1.67	66	23.66	male
20	M3	R2	Newton	Heel	right	78.3	2023-09-22	2023-09-29	61.38	1.67	66	23.66	male
20	M3	R3	Newton	Heel	right	94.6	2023-09-22	2023-09-29	61.38	1.67	66	23.66	male
20	M3	R1	Newton	1st TP	right	46.2	2023-09-22	2023-09-29	61.38	1.67	66	23.66	male
20	M3	R2	Newton	1st TP	right	38.7	2023-09-22	2023-09-29	61.38	1.67	66	23.66	male
20	M3	R3	Newton	1st TP	right	40	2023-09-22	2023-09-29	61.38	1.67	66	23.66	male
20	M3	R1	Newton	1st MH	left	43.1	2023-09-22	2023-09-29	61.38	1.67	66	23.66	male
20	M3	R2	Newton	1st MH	left	51	2023-09-22	2023-09-29	61.38	1.67	66	23.66	male
20	M3	R3	Newton	1st MH	left	50.6	2023-09-22	2023-09-29	61.38	1.67	66	23.66	male
20	M3	R1	Newton	5th MH	left	64.6	2023-09-22	2023-09-29	61.38	1.67	66	23.66	male
20	M3	R2	Newton	5th MH	left	56.3	2023-09-22	2023-09-29	61.38	1.67	66	23.66	male
20	M3	R3	Newton	5th MH	left	57.2	2023-09-22	2023-09-29	61.38	1.67	66	23.66	male
20	M3	R1	Newton	Heel	left	73.4	2023-09-22	2023-09-29	61.38	1.67	66	23.66	male
20	M3	R2	Newton	Heel	left	76.5	2023-09-22	2023-09-29	61.38	1.67	66	23.66	male
20	M3	R3	Newton	Heel	left	79.2	2023-09-22	2023-09-29	61.38	1.67	66	23.66	male
20	M3	R1	Newton	1st TP	left	41.8	2023-09-22	2023-09-29	61.38	1.67	66	23.66	male
20	M3	R2	Newton	1st TP	left	43.5	2023-09-22	2023-09-29	61.38	1.67	66	23.66	male
20	M3	R3	Newton	1st TP	left	40	2023-09-22	2023-09-29	61.38	1.67	66	23.66	male
21	M1	R1	Newton	1st MH	right	88	2023-09-22	2023-09-29	60.69	1.59	70	27.69	female
21	M1	R2	Newton	1st MH	right	80.9	2023-09-22	2023-09-29	60.69	1.59	70	27.69	female
21	M1	R3	Newton	1st MH	right	83.1	2023-09-22	2023-09-29	60.69	1.59	70	27.69	female
21	M1	R1	Newton	5th MH	right	64.2	2023-09-22	2023-09-29	60.69	1.59	70	27.69	female
21	M1	R2	Newton	5th MH	right	88.8	2023-09-22	2023-09-29	60.69	1.59	70	27.69	female
21	M1	R3	Newton	5th MH	right	81.4	2023-09-22	2023-09-29	60.69	1.59	70	27.69	female
21	M1	R1	Newton	Heel	right	70.4	2023-09-22	2023-09-29	60.69	1.59	70	27.69	female
21	M1	R2	Newton	Heel	right	80	2023-09-22	2023-09-29	60.69	1.59	70	27.69	female
21	M1	R3	Newton	Heel	right	95	2023-09-22	2023-09-29	60.69	1.59	70	27.69	female
21	M1	R1	Newton	1st TP	right	64.2	2023-09-22	2023-09-29	60.69	1.59	70	27.69	female
21	M1	R2	Newton	1st TP	right	51	2023-09-22	2023-09-29	60.69	1.59	70	27.69	female
21	M1	R3	Newton	1st TP	right	59.8	2023-09-22	2023-09-29	60.69	1.59	70	27.69	female
21	M1	R1	Newton	1st MH	left	86.2	2023-09-22	2023-09-29	60.69	1.59	70	27.69	female
21	M1	R2	Newton	1st MH	left	78.7	2023-09-22	2023-09-29	60.69	1.59	70	27.69	female
21	M1	R3	Newton	1st MH	left	90.6	2023-09-22	2023-09-29	60.69	1.59	70	27.69	female
21	M1	R1	Newton	5th MH	left	75.6	2023-09-22	2023-09-29	60.69	1.59	70	27.69	female
21	M1	R2	Newton	5th MH	left	89.7	2023-09-22	2023-09-29	60.69	1.59	70	27.69	female
21	M1	R3	Newton	5th MH	left	73	2023-09-22	2023-09-29	60.69	1.59	70	27.69	female
21	M1	R1	Newton	Heel	left	73.4	2023-09-22	2023-09-29	60.69	1.59	70	27.69	female
21	M1	R2	Newton	Heel	left	110	2023-09-22	2023-09-29	60.69	1.59	70	27.69	female
21	M1	R3	Newton	Heel	left	88.4	2023-09-22	2023-09-29	60.69	1.59	70	27.69	female
21	M1	R1	Newton	1st TP	left	72.6	2023-09-22	2023-09-29	60.69	1.59	70	27.69	female
21	M1	R2	Newton	1st TP	left	76.1	2023-09-22	2023-09-29	60.69	1.59	70	27.69	female
21	M1	R3	Newton	1st TP	left	56.3	2023-09-22	2023-09-29	60.69	1.59	70	27.69	female
21	M2	R1	Newton	1st MH	right	77.4	2023-09-22	2023-09-29	60.69	1.59	70	27.69	female
21	M2	R2	Newton	1st MH	right	63.3	2023-09-22	2023-09-29	60.69	1.59	70	27.69	female
21	M2	R3	Newton	1st MH	right	78.3	2023-09-22	2023-09-29	60.69	1.59	70	27.69	female
21	M2	R1	Newton	5th MH	right	74.3	2023-09-22	2023-09-29	60.69	1.59	70	27.69	female
21	M2	R2	Newton	5th MH	right	76.5	2023-09-22	2023-09-29	60.69	1.59	70	27.69	female
21	M2	R3	Newton	5th MH	right	67.3	2023-09-22	2023-09-29	60.69	1.59	70	27.69	female
21	M2	R1	Newton	Heel	right	66	2023-09-22	2023-09-29	60.69	1.59	70	27.69	female
21	M2	R2	Newton	Heel	right	73.4	2023-09-22	2023-09-29	60.69	1.59	70	27.69	female
21	M2	R3	Newton	Heel	right	80.9	2023-09-22	2023-09-29	60.69	1.59	70	27.69	female
21	M2	R1	Newton	1st TP	right	47.9	2023-09-22	2023-09-29	60.69	1.59	70	27.69	female
21	M2	R2	Newton	1st TP	right	61.1	2023-09-22	2023-09-29	60.69	1.59	70	27.69	female
21	M2	R3	Newton	1st TP	right	53.6	2023-09-22	2023-09-29	60.69	1.59	70	27.69	female
21	M2	R1	Newton	1st MH	left	69.5	2023-09-22	2023-09-29	60.69	1.59	70	27.69	female
21	M2	R2	Newton	1st MH	left	73	2023-09-22	2023-09-29	60.69	1.59	70	27.69	female
21	M2	R3	Newton	1st MH	left	73.9	2023-09-22	2023-09-29	60.69	1.59	70	27.69	female
21	M2	R1	Newton	5th MH	left	76.5	2023-09-22	2023-09-29	60.69	1.59	70	27.69	female
21	M2	R2	Newton	5th MH	left	62.9	2023-09-22	2023-09-29	60.69	1.59	70	27.69	female
21	M2	R3	Newton	5th MH	left	75.2	2023-09-22	2023-09-29	60.69	1.59	70	27.69	female
21	M2	R1	Newton	Heel	left	73.9	2023-09-22	2023-09-29	60.69	1.59	70	27.69	female
21	M2	R2	Newton	Heel	left	80.5	2023-09-22	2023-09-29	60.69	1.59	70	27.69	female
21	M2	R3	Newton	Heel	left	84	2023-09-22	2023-09-29	60.69	1.59	70	27.69	female
21	M2	R1	Newton	1st TP	left	55.4	2023-09-22	2023-09-29	60.69	1.59	70	27.69	female
21	M2	R2	Newton	1st TP	left	69	2023-09-22	2023-09-29	60.69	1.59	70	27.69	female
21	M2	R3	Newton	1st TP	left	60.2	2023-09-22	2023-09-29	60.69	1.59	70	27.69	female
21	M3	R1	Newton	1st MH	right	77.8	2023-09-22	2023-09-29	60.69	1.59	70	27.69	female
21	M3	R2	Newton	1st MH	right	67.7	2023-09-22	2023-09-29	60.69	1.59	70	27.69	female
21	M3	R3	Newton	1st MH	right	70.8	2023-09-22	2023-09-29	60.69	1.59	70	27.69	female
21	M3	R1	Newton	5th MH	right	79.2	2023-09-22	2023-09-29	60.69	1.59	70	27.69	female
21	M3	R2	Newton	5th MH	right	78.7	2023-09-22	2023-09-29	60.69	1.59	70	27.69	female
21	M3	R3	Newton	5th MH	right	78.3	2023-09-22	2023-09-29	60.69	1.59	70	27.69	female
21	M3	R1	Newton	Heel	right	84.9	2023-09-22	2023-09-29	60.69	1.59	70	27.69	female
21	M3	R2	Newton	Heel	right	95.9	2023-09-22	2023-09-29	60.69	1.59	70	27.69	female
21	M3	R3	Newton	Heel	right	89.7	2023-09-22	2023-09-29	60.69	1.59	70	27.69	female
21	M3	R1	Newton	1st TP	right	57.6	2023-09-22	2023-09-29	60.69	1.59	70	27.69	female
21	M3	R2	Newton	1st TP	right	48.4	2023-09-22	2023-09-29	60.69	1.59	70	27.69	female
21	M3	R3	Newton	1st TP	right	49.2	2023-09-22	2023-09-29	60.69	1.59	70	27.69	female
21	M3	R1	Newton	1st MH	left	73.4	2023-09-22	2023-09-29	60.69	1.59	70	27.69	female
21	M3	R2	Newton	1st MH	left	73.4	2023-09-22	2023-09-29	60.69	1.59	70	27.69	female
21	M3	R3	Newton	1st MH	left	76.5	2023-09-22	2023-09-29	60.69	1.59	70	27.69	female
21	M3	R1	Newton	5th MH	left	81.8	2023-09-22	2023-09-29	60.69	1.59	70	27.69	female
21	M3	R2	Newton	5th MH	left	71.7	2023-09-22	2023-09-29	60.69	1.59	70	27.69	female
21	M3	R3	Newton	5th MH	left	84.9	2023-09-22	2023-09-29	60.69	1.59	70	27.69	female
21	M3	R1	Newton	Heel	left	102	2023-09-22	2023-09-29	60.69	1.59	70	27.69	female
21	M3	R2	Newton	Heel	left	88.4	2023-09-22	2023-09-29	60.69	1.59	70	27.69	female
21	M3	R3	Newton	Heel	left	102	2023-09-22	2023-09-29	60.69	1.59	70	27.69	female
21	M3	R1	Newton	1st TP	left	53.2	2023-09-22	2023-09-29	60.69	1.59	70	27.69	female
21	M3	R2	Newton	1st TP	left	51.4	2023-09-22	2023-09-29	60.69	1.59	70	27.69	female
21	M3	R3	Newton	1st TP	left	47.9	2023-09-22	2023-09-29	60.69	1.59	70	27.69	female
22	M1	R1	Newton	1st MH	right	100	2023-09-25	2023-10-02	68.78	1.67	68	24.38	female
22	M1	R2	Newton	1st MH	right	105	2023-09-25	2023-10-02	68.78	1.67	68	24.38	female
22	M1	R3	Newton	1st MH	right	85.8	2023-09-25	2023-10-02	68.78	1.67	68	24.38	female
22	M1	R1	Newton	5th MH	right	100	2023-09-25	2023-10-02	68.78	1.67	68	24.38	female
22	M1	R2	Newton	5th MH	right	106	2023-09-25	2023-10-02	68.78	1.67	68	24.38	female
22	M1	R3	Newton	5th MH	right	99.4	2023-09-25	2023-10-02	68.78	1.67	68	24.38	female
22	M1	R1	Newton	Heel	right	110	2023-09-25	2023-10-02	68.78	1.67	68	24.38	female
22	M1	R2	Newton	Heel	right	110	2023-09-25	2023-10-02	68.78	1.67	68	24.38	female
22	M1	R3	Newton	Heel	right	110	2023-09-25	2023-10-02	68.78	1.67	68	24.38	female
22	M1	R1	Newton	1st TP	right	78.7	2023-09-25	2023-10-02	68.78	1.67	68	24.38	female
22	M1	R2	Newton	1st TP	right	88	2023-09-25	2023-10-02	68.78	1.67	68	24.38	female
22	M1	R3	Newton	1st TP	right	78.7	2023-09-25	2023-10-02	68.78	1.67	68	24.38	female
22	M1	R1	Newton	1st MH	left	92.8	2023-09-25	2023-10-02	68.78	1.67	68	24.38	female
22	M1	R2	Newton	1st MH	left	98.1	2023-09-25	2023-10-02	68.78	1.67	68	24.38	female
22	M1	R3	Newton	1st MH	left	102	2023-09-25	2023-10-02	68.78	1.67	68	24.38	female
22	M1	R1	Newton	5th MH	left	110	2023-09-25	2023-10-02	68.78	1.67	68	24.38	female
22	M1	R2	Newton	5th MH	left	85.3	2023-09-25	2023-10-02	68.78	1.67	68	24.38	female
22	M1	R3	Newton	5th MH	left	95	2023-09-25	2023-10-02	68.78	1.67	68	24.38	female
22	M1	R1	Newton	Heel	left	110	2023-09-25	2023-10-02	68.78	1.67	68	24.38	female
22	M1	R2	Newton	Heel	left	110	2023-09-25	2023-10-02	68.78	1.67	68	24.38	female
22	M1	R3	Newton	Heel	left	110	2023-09-25	2023-10-02	68.78	1.67	68	24.38	female
22	M1	R1	Newton	1st TP	left	88	2023-09-25	2023-10-02	68.78	1.67	68	24.38	female
22	M1	R2	Newton	1st TP	left	80.5	2023-09-25	2023-10-02	68.78	1.67	68	24.38	female
22	M1	R3	Newton	1st TP	left	82.7	2023-09-25	2023-10-02	68.78	1.67	68	24.38	female
22	M2	R1	Newton	1st MH	right	101	2023-09-25	2023-10-02	68.78	1.67	68	24.38	female
22	M2	R2	Newton	1st MH	right	100	2023-09-25	2023-10-02	68.78	1.67	68	24.38	female
22	M2	R3	Newton	1st MH	right	97.6	2023-09-25	2023-10-02	68.78	1.67	68	24.38	female
22	M2	R1	Newton	5th MH	right	97.6	2023-09-25	2023-10-02	68.78	1.67	68	24.38	female
22	M2	R2	Newton	5th MH	right	86.6	2023-09-25	2023-10-02	68.78	1.67	68	24.38	female
22	M2	R3	Newton	5th MH	right	87.5	2023-09-25	2023-10-02	68.78	1.67	68	24.38	female
22	M2	R1	Newton	Heel	right	110	2023-09-25	2023-10-02	68.78	1.67	68	24.38	female
22	M2	R2	Newton	Heel	right	110	2023-09-25	2023-10-02	68.78	1.67	68	24.38	female
22	M2	R3	Newton	Heel	right	110	2023-09-25	2023-10-02	68.78	1.67	68	24.38	female
22	M2	R1	Newton	1st TP	right	86.2	2023-09-25	2023-10-02	68.78	1.67	68	24.38	female
22	M2	R2	Newton	1st TP	right	91	2023-09-25	2023-10-02	68.78	1.67	68	24.38	female
22	M2	R3	Newton	1st TP	right	90.2	2023-09-25	2023-10-02	68.78	1.67	68	24.38	female
22	M2	R1	Newton	1st MH	left	110	2023-09-25	2023-10-02	68.78	1.67	68	24.38	female
22	M2	R2	Newton	1st MH	left	110	2023-09-25	2023-10-02	68.78	1.67	68	24.38	female
22	M2	R3	Newton	1st MH	left	110	2023-09-25	2023-10-02	68.78	1.67	68	24.38	female
22	M2	R1	Newton	5th MH	left	99.4	2023-09-25	2023-10-02	68.78	1.67	68	24.38	female
22	M2	R2	Newton	5th MH	left	96.3	2023-09-25	2023-10-02	68.78	1.67	68	24.38	female
22	M2	R3	Newton	5th MH	left	95	2023-09-25	2023-10-02	68.78	1.67	68	24.38	female
22	M2	R1	Newton	Heel	left	110	2023-09-25	2023-10-02	68.78	1.67	68	24.38	female
22	M2	R2	Newton	Heel	left	110	2023-09-25	2023-10-02	68.78	1.67	68	24.38	female
22	M2	R3	Newton	Heel	left	110	2023-09-25	2023-10-02	68.78	1.67	68	24.38	female
22	M2	R1	Newton	1st TP	left	93.7	2023-09-25	2023-10-02	68.78	1.67	68	24.38	female
22	M2	R2	Newton	1st TP	left	96.8	2023-09-25	2023-10-02	68.78	1.67	68	24.38	female
22	M2	R3	Newton	1st TP	left	91.5	2023-09-25	2023-10-02	68.78	1.67	68	24.38	female
22	M3	R1	Newton	1st MH	right	84	2023-09-25	2023-10-02	68.78	1.67	68	24.38	female
22	M3	R2	Newton	1st MH	right	89.7	2023-09-25	2023-10-02	68.78	1.67	68	24.38	female
22	M3	R3	Newton	1st MH	right	101	2023-09-25	2023-10-02	68.78	1.67	68	24.38	female
22	M3	R1	Newton	5th MH	right	89.7	2023-09-25	2023-10-02	68.78	1.67	68	24.38	female
22	M3	R2	Newton	5th MH	right	97.6	2023-09-25	2023-10-02	68.78	1.67	68	24.38	female
22	M3	R3	Newton	5th MH	right	88.4	2023-09-25	2023-10-02	68.78	1.67	68	24.38	female
22	M3	R1	Newton	Heel	right	110	2023-09-25	2023-10-02	68.78	1.67	68	24.38	female
22	M3	R2	Newton	Heel	right	110	2023-09-25	2023-10-02	68.78	1.67	68	24.38	female
22	M3	R3	Newton	Heel	right	110	2023-09-25	2023-10-02	68.78	1.67	68	24.38	female
22	M3	R1	Newton	1st TP	right	74.3	2023-09-25	2023-10-02	68.78	1.67	68	24.38	female
22	M3	R2	Newton	1st TP	right	80.5	2023-09-25	2023-10-02	68.78	1.67	68	24.38	female
22	M3	R3	Newton	1st TP	right	75.2	2023-09-25	2023-10-02	68.78	1.67	68	24.38	female
22	M3	R1	Newton	1st MH	left	93.7	2023-09-25	2023-10-02	68.78	1.67	68	24.38	female
22	M3	R2	Newton	1st MH	left	100	2023-09-25	2023-10-02	68.78	1.67	68	24.38	female
22	M3	R3	Newton	1st MH	left	93.2	2023-09-25	2023-10-02	68.78	1.67	68	24.38	female
22	M3	R1	Newton	5th MH	left	96.3	2023-09-25	2023-10-02	68.78	1.67	68	24.38	female
22	M3	R2	Newton	5th MH	left	101	2023-09-25	2023-10-02	68.78	1.67	68	24.38	female
22	M3	R3	Newton	5th MH	left	98.5	2023-09-25	2023-10-02	68.78	1.67	68	24.38	female
22	M3	R1	Newton	Heel	left	110	2023-09-25	2023-10-02	68.78	1.67	68	24.38	female
22	M3	R2	Newton	Heel	left	110	2023-09-25	2023-10-02	68.78	1.67	68	24.38	female
22	M3	R3	Newton	Heel	left	110	2023-09-25	2023-10-02	68.78	1.67	68	24.38	female
22	M3	R1	Newton	1st TP	left	77	2023-09-25	2023-10-02	68.78	1.67	68	24.38	female
22	M3	R2	Newton	1st TP	left	80.5	2023-09-25	2023-10-02	68.78	1.67	68	24.38	female
22	M3	R3	Newton	1st TP	left	77.4	2023-09-25	2023-10-02	68.78	1.67	68	24.38	female
23	M1	R1	Newton	1st MH	right	110	2023-09-25	2023-10-02	70.61	1.7	95	32.87	male
23	M1	R2	Newton	1st MH	right	110	2023-09-25	2023-10-02	70.61	1.7	95	32.87	male
23	M1	R3	Newton	1st MH	right	110	2023-09-25	2023-10-02	70.61	1.7	95	32.87	male
23	M1	R1	Newton	5th MH	right	110	2023-09-25	2023-10-02	70.61	1.7	95	32.87	male
23	M1	R2	Newton	5th MH	right	110	2023-09-25	2023-10-02	70.61	1.7	95	32.87	male
23	M1	R3	Newton	5th MH	right	110	2023-09-25	2023-10-02	70.61	1.7	95	32.87	male
23	M1	R1	Newton	Heel	right	110	2023-09-25	2023-10-02	70.61	1.7	95	32.87	male
23	M1	R2	Newton	Heel	right	110	2023-09-25	2023-10-02	70.61	1.7	95	32.87	male
23	M1	R3	Newton	Heel	right	110	2023-09-25	2023-10-02	70.61	1.7	95	32.87	male
23	M1	R1	Newton	1st TP	right	110	2023-09-25	2023-10-02	70.61	1.7	95	32.87	male
23	M1	R2	Newton	1st TP	right	110	2023-09-25	2023-10-02	70.61	1.7	95	32.87	male
23	M1	R3	Newton	1st TP	right	110	2023-09-25	2023-10-02	70.61	1.7	95	32.87	male
23	M1	R1	Newton	1st MH	left	110	2023-09-25	2023-10-02	70.61	1.7	95	32.87	male
23	M1	R2	Newton	1st MH	left	110	2023-09-25	2023-10-02	70.61	1.7	95	32.87	male
23	M1	R3	Newton	1st MH	left	110	2023-09-25	2023-10-02	70.61	1.7	95	32.87	male
23	M1	R1	Newton	5th MH	left	110	2023-09-25	2023-10-02	70.61	1.7	95	32.87	male
23	M1	R2	Newton	5th MH	left	110	2023-09-25	2023-10-02	70.61	1.7	95	32.87	male
23	M1	R3	Newton	5th MH	left	110	2023-09-25	2023-10-02	70.61	1.7	95	32.87	male
23	M1	R1	Newton	Heel	left	110	2023-09-25	2023-10-02	70.61	1.7	95	32.87	male
23	M1	R2	Newton	Heel	left	110	2023-09-25	2023-10-02	70.61	1.7	95	32.87	male
23	M1	R3	Newton	Heel	left	110	2023-09-25	2023-10-02	70.61	1.7	95	32.87	male
23	M1	R1	Newton	1st TP	left	110	2023-09-25	2023-10-02	70.61	1.7	95	32.87	male
23	M1	R2	Newton	1st TP	left	110	2023-09-25	2023-10-02	70.61	1.7	95	32.87	male
23	M1	R3	Newton	1st TP	left	110	2023-09-25	2023-10-02	70.61	1.7	95	32.87	male
23	M2	R1	Newton	1st MH	right	110	2023-09-25	2023-10-02	70.61	1.7	95	32.87	male
23	M2	R2	Newton	1st MH	right	110	2023-09-25	2023-10-02	70.61	1.7	95	32.87	male
23	M2	R3	Newton	1st MH	right	110	2023-09-25	2023-10-02	70.61	1.7	95	32.87	male
23	M2	R1	Newton	5th MH	right	110	2023-09-25	2023-10-02	70.61	1.7	95	32.87	male
23	M2	R2	Newton	5th MH	right	110	2023-09-25	2023-10-02	70.61	1.7	95	32.87	male
23	M2	R3	Newton	5th MH	right	110	2023-09-25	2023-10-02	70.61	1.7	95	32.87	male
23	M2	R1	Newton	Heel	right	110	2023-09-25	2023-10-02	70.61	1.7	95	32.87	male
23	M2	R2	Newton	Heel	right	110	2023-09-25	2023-10-02	70.61	1.7	95	32.87	male
23	M2	R3	Newton	Heel	right	110	2023-09-25	2023-10-02	70.61	1.7	95	32.87	male
23	M2	R1	Newton	1st TP	right	110	2023-09-25	2023-10-02	70.61	1.7	95	32.87	male
23	M2	R2	Newton	1st TP	right	110	2023-09-25	2023-10-02	70.61	1.7	95	32.87	male
23	M2	R3	Newton	1st TP	right	110	2023-09-25	2023-10-02	70.61	1.7	95	32.87	male
23	M2	R1	Newton	1st MH	left	110	2023-09-25	2023-10-02	70.61	1.7	95	32.87	male
23	M2	R2	Newton	1st MH	left	110	2023-09-25	2023-10-02	70.61	1.7	95	32.87	male
23	M2	R3	Newton	1st MH	left	110	2023-09-25	2023-10-02	70.61	1.7	95	32.87	male
23	M2	R1	Newton	5th MH	left	110	2023-09-25	2023-10-02	70.61	1.7	95	32.87	male
23	M2	R2	Newton	5th MH	left	110	2023-09-25	2023-10-02	70.61	1.7	95	32.87	male
23	M2	R3	Newton	5th MH	left	110	2023-09-25	2023-10-02	70.61	1.7	95	32.87	male
23	M2	R1	Newton	Heel	left	110	2023-09-25	2023-10-02	70.61	1.7	95	32.87	male
23	M2	R2	Newton	Heel	left	110	2023-09-25	2023-10-02	70.61	1.7	95	32.87	male
23	M2	R3	Newton	Heel	left	110	2023-09-25	2023-10-02	70.61	1.7	95	32.87	male
23	M2	R1	Newton	1st TP	left	110	2023-09-25	2023-10-02	70.61	1.7	95	32.87	male
23	M2	R2	Newton	1st TP	left	110	2023-09-25	2023-10-02	70.61	1.7	95	32.87	male
23	M2	R3	Newton	1st TP	left	110	2023-09-25	2023-10-02	70.61	1.7	95	32.87	male
23	M3	R1	Newton	1st MH	right	110	2023-09-25	2023-10-02	70.61	1.7	95	32.87	male
23	M3	R2	Newton	1st MH	right	110	2023-09-25	2023-10-02	70.61	1.7	95	32.87	male
23	M3	R3	Newton	1st MH	right	110	2023-09-25	2023-10-02	70.61	1.7	95	32.87	male
23	M3	R1	Newton	5th MH	right	110	2023-09-25	2023-10-02	70.61	1.7	95	32.87	male
23	M3	R2	Newton	5th MH	right	110	2023-09-25	2023-10-02	70.61	1.7	95	32.87	male
23	M3	R3	Newton	5th MH	right	110	2023-09-25	2023-10-02	70.61	1.7	95	32.87	male
23	M3	R1	Newton	Heel	right	110	2023-09-25	2023-10-02	70.61	1.7	95	32.87	male
23	M3	R2	Newton	Heel	right	110	2023-09-25	2023-10-02	70.61	1.7	95	32.87	male
23	M3	R3	Newton	Heel	right	110	2023-09-25	2023-10-02	70.61	1.7	95	32.87	male
23	M3	R1	Newton	1st TP	right	110	2023-09-25	2023-10-02	70.61	1.7	95	32.87	male
23	M3	R2	Newton	1st TP	right	110	2023-09-25	2023-10-02	70.61	1.7	95	32.87	male
23	M3	R3	Newton	1st TP	right	110	2023-09-25	2023-10-02	70.61	1.7	95	32.87	male
23	M3	R1	Newton	1st MH	left	110	2023-09-25	2023-10-02	70.61	1.7	95	32.87	male
23	M3	R2	Newton	1st MH	left	110	2023-09-25	2023-10-02	70.61	1.7	95	32.87	male
23	M3	R3	Newton	1st MH	left	110	2023-09-25	2023-10-02	70.61	1.7	95	32.87	male
23	M3	R1	Newton	5th MH	left	110	2023-09-25	2023-10-02	70.61	1.7	95	32.87	male
23	M3	R2	Newton	5th MH	left	110	2023-09-25	2023-10-02	70.61	1.7	95	32.87	male
23	M3	R3	Newton	5th MH	left	110	2023-09-25	2023-10-02	70.61	1.7	95	32.87	male
23	M3	R1	Newton	Heel	left	110	2023-09-25	2023-10-02	70.61	1.7	95	32.87	male
23	M3	R2	Newton	Heel	left	110	2023-09-25	2023-10-02	70.61	1.7	95	32.87	male
23	M3	R3	Newton	Heel	left	110	2023-09-25	2023-10-02	70.61	1.7	95	32.87	male
23	M3	R1	Newton	1st TP	left	110	2023-09-25	2023-10-02	70.61	1.7	95	32.87	male
23	M3	R2	Newton	1st TP	left	110	2023-09-25	2023-10-02	70.61	1.7	95	32.87	male
23	M3	R3	Newton	1st TP	left	110	2023-09-25	2023-10-02	70.61	1.7	95	32.87	male
24	M1	R1	Newton	1st MH	right	105	2023-09-25	2023-10-02	73.68	1.59	73.5	29.07	female
24	M1	R2	Newton	1st MH	right	105	2023-09-25	2023-10-02	73.68	1.59	73.5	29.07	female
24	M1	R3	Newton	1st MH	right	102	2023-09-25	2023-10-02	73.68	1.59	73.5	29.07	female
24	M1	R1	Newton	5th MH	right	105	2023-09-25	2023-10-02	73.68	1.59	73.5	29.07	female
24	M1	R2	Newton	5th MH	right	105	2023-09-25	2023-10-02	73.68	1.59	73.5	29.07	female
24	M1	R3	Newton	5th MH	right	101	2023-09-25	2023-10-02	73.68	1.59	73.5	29.07	female
24	M1	R1	Newton	Heel	right	110	2023-09-25	2023-10-02	73.68	1.59	73.5	29.07	female
24	M1	R2	Newton	Heel	right	102	2023-09-25	2023-10-02	73.68	1.59	73.5	29.07	female
24	M1	R3	Newton	Heel	right	110	2023-09-25	2023-10-02	73.68	1.59	73.5	29.07	female
24	M1	R1	Newton	1st TP	right	52.3	2023-09-25	2023-10-02	73.68	1.59	73.5	29.07	female
24	M1	R2	Newton	1st TP	right	51	2023-09-25	2023-10-02	73.68	1.59	73.5	29.07	female
24	M1	R3	Newton	1st TP	right	53.6	2023-09-25	2023-10-02	73.68	1.59	73.5	29.07	female
24	M1	R1	Newton	1st MH	left	103	2023-09-25	2023-10-02	73.68	1.59	73.5	29.07	female
24	M1	R2	Newton	1st MH	left	92.4	2023-09-25	2023-10-02	73.68	1.59	73.5	29.07	female
24	M1	R3	Newton	1st MH	left	99.8	2023-09-25	2023-10-02	73.68	1.59	73.5	29.07	female
24	M1	R1	Newton	5th MH	left	110	2023-09-25	2023-10-02	73.68	1.59	73.5	29.07	female
24	M1	R2	Newton	5th MH	left	101	2023-09-25	2023-10-02	73.68	1.59	73.5	29.07	female
24	M1	R3	Newton	5th MH	left	101	2023-09-25	2023-10-02	73.68	1.59	73.5	29.07	female
24	M1	R1	Newton	Heel	left	110	2023-09-25	2023-10-02	73.68	1.59	73.5	29.07	female
24	M1	R2	Newton	Heel	left	90.6	2023-09-25	2023-10-02	73.68	1.59	73.5	29.07	female
24	M1	R3	Newton	Heel	left	98.5	2023-09-25	2023-10-02	73.68	1.59	73.5	29.07	female
24	M1	R1	Newton	1st TP	left	59.4	2023-09-25	2023-10-02	73.68	1.59	73.5	29.07	female
24	M1	R2	Newton	1st TP	left	60.2	2023-09-25	2023-10-02	73.68	1.59	73.5	29.07	female
24	M1	R3	Newton	1st TP	left	56.7	2023-09-25	2023-10-02	73.68	1.59	73.5	29.07	female
24	M2	R1	Newton	1st MH	right	88.8	2023-09-25	2023-10-02	73.68	1.59	73.5	29.07	female
24	M2	R2	Newton	1st MH	right	89.7	2023-09-25	2023-10-02	73.68	1.59	73.5	29.07	female
24	M2	R3	Newton	1st MH	right	99.4	2023-09-25	2023-10-02	73.68	1.59	73.5	29.07	female
24	M2	R1	Newton	5th MH	right	102	2023-09-25	2023-10-02	73.68	1.59	73.5	29.07	female
24	M2	R2	Newton	5th MH	right	103	2023-09-25	2023-10-02	73.68	1.59	73.5	29.07	female
24	M2	R3	Newton	5th MH	right	102	2023-09-25	2023-10-02	73.68	1.59	73.5	29.07	female
24	M2	R1	Newton	Heel	right	110	2023-09-25	2023-10-02	73.68	1.59	73.5	29.07	female
24	M2	R2	Newton	Heel	right	110	2023-09-25	2023-10-02	73.68	1.59	73.5	29.07	female
24	M2	R3	Newton	Heel	right	106	2023-09-25	2023-10-02	73.68	1.59	73.5	29.07	female
24	M2	R1	Newton	1st TP	right	52.3	2023-09-25	2023-10-02	73.68	1.59	73.5	29.07	female
24	M2	R2	Newton	1st TP	right	60.2	2023-09-25	2023-10-02	73.68	1.59	73.5	29.07	female
24	M2	R3	Newton	1st TP	right	55.8	2023-09-25	2023-10-02	73.68	1.59	73.5	29.07	female
24	M2	R1	Newton	1st MH	left	101	2023-09-25	2023-10-02	73.68	1.59	73.5	29.07	female
24	M2	R2	Newton	1st MH	left	78.3	2023-09-25	2023-10-02	73.68	1.59	73.5	29.07	female
24	M2	R3	Newton	1st MH	left	90.6	2023-09-25	2023-10-02	73.68	1.59	73.5	29.07	female
24	M2	R1	Newton	5th MH	left	106	2023-09-25	2023-10-02	73.68	1.59	73.5	29.07	female
24	M2	R2	Newton	5th MH	left	99.8	2023-09-25	2023-10-02	73.68	1.59	73.5	29.07	female
24	M2	R3	Newton	5th MH	left	99	2023-09-25	2023-10-02	73.68	1.59	73.5	29.07	female
24	M2	R1	Newton	Heel	left	104	2023-09-25	2023-10-02	73.68	1.59	73.5	29.07	female
24	M2	R2	Newton	Heel	left	110	2023-09-25	2023-10-02	73.68	1.59	73.5	29.07	female
24	M2	R3	Newton	Heel	left	110	2023-09-25	2023-10-02	73.68	1.59	73.5	29.07	female
24	M2	R1	Newton	1st TP	left	60.7	2023-09-25	2023-10-02	73.68	1.59	73.5	29.07	female
24	M2	R2	Newton	1st TP	left	54.5	2023-09-25	2023-10-02	73.68	1.59	73.5	29.07	female
24	M2	R3	Newton	1st TP	left	52.8	2023-09-25	2023-10-02	73.68	1.59	73.5	29.07	female
24	M3	R1	Newton	1st MH	right	76.1	2023-09-25	2023-10-02	73.68	1.59	73.5	29.07	female
24	M3	R2	Newton	1st MH	right	69.9	2023-09-25	2023-10-02	73.68	1.59	73.5	29.07	female
24	M3	R3	Newton	1st MH	right	72.1	2023-09-25	2023-10-02	73.68	1.59	73.5	29.07	female
24	M3	R1	Newton	5th MH	right	80	2023-09-25	2023-10-02	73.68	1.59	73.5	29.07	female
24	M3	R2	Newton	5th MH	right	71.2	2023-09-25	2023-10-02	73.68	1.59	73.5	29.07	female
24	M3	R3	Newton	5th MH	right	74.8	2023-09-25	2023-10-02	73.68	1.59	73.5	29.07	female
24	M3	R1	Newton	Heel	right	110	2023-09-25	2023-10-02	73.68	1.59	73.5	29.07	female
24	M3	R2	Newton	Heel	right	92.8	2023-09-25	2023-10-02	73.68	1.59	73.5	29.07	female
24	M3	R3	Newton	Heel	right	104	2023-09-25	2023-10-02	73.68	1.59	73.5	29.07	female
24	M3	R1	Newton	1st TP	right	57.6	2023-09-25	2023-10-02	73.68	1.59	73.5	29.07	female
24	M3	R2	Newton	1st TP	right	58.5	2023-09-25	2023-10-02	73.68	1.59	73.5	29.07	female
24	M3	R3	Newton	1st TP	right	56.7	2023-09-25	2023-10-02	73.68	1.59	73.5	29.07	female
24	M3	R1	Newton	1st MH	left	58.5	2023-09-25	2023-10-02	73.68	1.59	73.5	29.07	female
24	M3	R2	Newton	1st MH	left	70.4	2023-09-25	2023-10-02	73.68	1.59	73.5	29.07	female
24	M3	R3	Newton	1st MH	left	84.9	2023-09-25	2023-10-02	73.68	1.59	73.5	29.07	female
24	M3	R1	Newton	5th MH	left	77.4	2023-09-25	2023-10-02	73.68	1.59	73.5	29.07	female
24	M3	R2	Newton	5th MH	left	77	2023-09-25	2023-10-02	73.68	1.59	73.5	29.07	female
24	M3	R3	Newton	5th MH	left	86.2	2023-09-25	2023-10-02	73.68	1.59	73.5	29.07	female
24	M3	R1	Newton	Heel	left	85.8	2023-09-25	2023-10-02	73.68	1.59	73.5	29.07	female
24	M3	R2	Newton	Heel	left	99	2023-09-25	2023-10-02	73.68	1.59	73.5	29.07	female
24	M3	R3	Newton	Heel	left	110	2023-09-25	2023-10-02	73.68	1.59	73.5	29.07	female
24	M3	R1	Newton	1st TP	left	58.9	2023-09-25	2023-10-02	73.68	1.59	73.5	29.07	female
24	M3	R2	Newton	1st TP	left	57.2	2023-09-25	2023-10-02	73.68	1.59	73.5	29.07	female
24	M3	R3	Newton	1st TP	left	52.8	2023-09-25	2023-10-02	73.68	1.59	73.5	29.07	female
25	M1	R1	Newton	1st MH	right	68.2	2023-09-25	2023-10-02	64.57	1.68	80	28.34	male
25	M1	R2	Newton	1st MH	right	66	2023-09-25	2023-10-02	64.57	1.68	80	28.34	male
25	M1	R3	Newton	1st MH	right	76.1	2023-09-25	2023-10-02	64.57	1.68	80	28.34	male
25	M1	R1	Newton	5th MH	right	65.5	2023-09-25	2023-10-02	64.57	1.68	80	28.34	male
25	M1	R2	Newton	5th MH	right	64.6	2023-09-25	2023-10-02	64.57	1.68	80	28.34	male
25	M1	R3	Newton	5th MH	right	65.5	2023-09-25	2023-10-02	64.57	1.68	80	28.34	male
25	M1	R1	Newton	Heel	right	95	2023-09-25	2023-10-02	64.57	1.68	80	28.34	male
25	M1	R2	Newton	Heel	right	82.7	2023-09-25	2023-10-02	64.57	1.68	80	28.34	male
25	M1	R3	Newton	Heel	right	81.4	2023-09-25	2023-10-02	64.57	1.68	80	28.34	male
25	M1	R1	Newton	1st TP	right	48.8	2023-09-25	2023-10-02	64.57	1.68	80	28.34	male
25	M1	R2	Newton	1st TP	right	43.5	2023-09-25	2023-10-02	64.57	1.68	80	28.34	male
25	M1	R3	Newton	1st TP	right	47	2023-09-25	2023-10-02	64.57	1.68	80	28.34	male
25	M1	R1	Newton	1st MH	left	62	2023-09-25	2023-10-02	64.57	1.68	80	28.34	male
25	M1	R2	Newton	1st MH	left	70.4	2023-09-25	2023-10-02	64.57	1.68	80	28.34	male
25	M1	R3	Newton	1st MH	left	68.6	2023-09-25	2023-10-02	64.57	1.68	80	28.34	male
25	M1	R1	Newton	5th MH	left	74.3	2023-09-25	2023-10-02	64.57	1.68	80	28.34	male
25	M1	R2	Newton	5th MH	left	67.7	2023-09-25	2023-10-02	64.57	1.68	80	28.34	male
25	M1	R3	Newton	5th MH	left	70.4	2023-09-25	2023-10-02	64.57	1.68	80	28.34	male
25	M1	R1	Newton	Heel	left	81.8	2023-09-25	2023-10-02	64.57	1.68	80	28.34	male
25	M1	R2	Newton	Heel	left	70.4	2023-09-25	2023-10-02	64.57	1.68	80	28.34	male
25	M1	R3	Newton	Heel	left	73	2023-09-25	2023-10-02	64.57	1.68	80	28.34	male
25	M1	R1	Newton	1st TP	left	48.8	2023-09-25	2023-10-02	64.57	1.68	80	28.34	male
25	M1	R2	Newton	1st TP	left	45.7	2023-09-25	2023-10-02	64.57	1.68	80	28.34	male
25	M1	R3	Newton	1st TP	left	52.8	2023-09-25	2023-10-02	64.57	1.68	80	28.34	male
25	M2	R1	Newton	1st MH	right	70.4	2023-09-25	2023-10-02	64.57	1.68	80	28.34	male
25	M2	R2	Newton	1st MH	right	69.5	2023-09-25	2023-10-02	64.57	1.68	80	28.34	male
25	M2	R3	Newton	1st MH	right	68.2	2023-09-25	2023-10-02	64.57	1.68	80	28.34	male
25	M2	R1	Newton	5th MH	right	64.6	2023-09-25	2023-10-02	64.57	1.68	80	28.34	male
25	M2	R2	Newton	5th MH	right	57.2	2023-09-25	2023-10-02	64.57	1.68	80	28.34	male
25	M2	R3	Newton	5th MH	right	68.2	2023-09-25	2023-10-02	64.57	1.68	80	28.34	male
25	M2	R1	Newton	Heel	right	87.1	2023-09-25	2023-10-02	64.57	1.68	80	28.34	male
25	M2	R2	Newton	Heel	right	92.8	2023-09-25	2023-10-02	64.57	1.68	80	28.34	male
25	M2	R3	Newton	Heel	right	84.9	2023-09-25	2023-10-02	64.57	1.68	80	28.34	male
25	M2	R1	Newton	1st TP	right	46.2	2023-09-25	2023-10-02	64.57	1.68	80	28.34	male
25	M2	R2	Newton	1st TP	right	44	2023-09-25	2023-10-02	64.57	1.68	80	28.34	male
25	M2	R3	Newton	1st TP	right	53.6	2023-09-25	2023-10-02	64.57	1.68	80	28.34	male
25	M2	R1	Newton	1st MH	left	70.4	2023-09-25	2023-10-02	64.57	1.68	80	28.34	male
25	M2	R2	Newton	1st MH	left	70.4	2023-09-25	2023-10-02	64.57	1.68	80	28.34	male
25	M2	R3	Newton	1st MH	left	72.1	2023-09-25	2023-10-02	64.57	1.68	80	28.34	male
25	M2	R1	Newton	5th MH	left	68.2	2023-09-25	2023-10-02	64.57	1.68	80	28.34	male
25	M2	R2	Newton	5th MH	left	60.2	2023-09-25	2023-10-02	64.57	1.68	80	28.34	male
25	M2	R3	Newton	5th MH	left	69.9	2023-09-25	2023-10-02	64.57	1.68	80	28.34	male
25	M2	R1	Newton	Heel	left	89.7	2023-09-25	2023-10-02	64.57	1.68	80	28.34	male
25	M2	R2	Newton	Heel	left	76.5	2023-09-25	2023-10-02	64.57	1.68	80	28.34	male
25	M2	R3	Newton	Heel	left	89.7	2023-09-25	2023-10-02	64.57	1.68	80	28.34	male
25	M2	R1	Newton	1st TP	left	53.6	2023-09-25	2023-10-02	64.57	1.68	80	28.34	male
25	M2	R2	Newton	1st TP	left	55.4	2023-09-25	2023-10-02	64.57	1.68	80	28.34	male
25	M2	R3	Newton	1st TP	left	66.4	2023-09-25	2023-10-02	64.57	1.68	80	28.34	male
25	M3	R1	Newton	1st MH	right	66.8	2023-09-25	2023-10-02	64.57	1.68	80	28.34	male
25	M3	R2	Newton	1st MH	right	81.4	2023-09-25	2023-10-02	64.57	1.68	80	28.34	male
25	M3	R3	Newton	1st MH	right	65.5	2023-09-25	2023-10-02	64.57	1.68	80	28.34	male
25	M3	R1	Newton	5th MH	right	77.8	2023-09-25	2023-10-02	64.57	1.68	80	28.34	male
25	M3	R2	Newton	5th MH	right	74.8	2023-09-25	2023-10-02	64.57	1.68	80	28.34	male
25	M3	R3	Newton	5th MH	right	77.8	2023-09-25	2023-10-02	64.57	1.68	80	28.34	male
25	M3	R1	Newton	Heel	right	96.3	2023-09-25	2023-10-02	64.57	1.68	80	28.34	male
25	M3	R2	Newton	Heel	right	92.4	2023-09-25	2023-10-02	64.57	1.68	80	28.34	male
25	M3	R3	Newton	Heel	right	86.2	2023-09-25	2023-10-02	64.57	1.68	80	28.34	male
25	M3	R1	Newton	1st TP	right	54.5	2023-09-25	2023-10-02	64.57	1.68	80	28.34	male
25	M3	R2	Newton	1st TP	right	51.4	2023-09-25	2023-10-02	64.57	1.68	80	28.34	male
25	M3	R3	Newton	1st TP	right	49.7	2023-09-25	2023-10-02	64.57	1.68	80	28.34	male
25	M3	R1	Newton	1st MH	left	74.3	2023-09-25	2023-10-02	64.57	1.68	80	28.34	male
25	M3	R2	Newton	1st MH	left	68.6	2023-09-25	2023-10-02	64.57	1.68	80	28.34	male
25	M3	R3	Newton	1st MH	left	60.2	2023-09-25	2023-10-02	64.57	1.68	80	28.34	male
25	M3	R1	Newton	5th MH	left	80	2023-09-25	2023-10-02	64.57	1.68	80	28.34	male
25	M3	R2	Newton	5th MH	left	78.3	2023-09-25	2023-10-02	64.57	1.68	80	28.34	male
25	M3	R3	Newton	5th MH	left	64.2	2023-09-25	2023-10-02	64.57	1.68	80	28.34	male
25	M3	R1	Newton	Heel	left	91	2023-09-25	2023-10-02	64.57	1.68	80	28.34	male
25	M3	R2	Newton	Heel	left	84.4	2023-09-25	2023-10-02	64.57	1.68	80	28.34	male
25	M3	R3	Newton	Heel	left	85.3	2023-09-25	2023-10-02	64.57	1.68	80	28.34	male
25	M3	R1	Newton	1st TP	left	57.2	2023-09-25	2023-10-02	64.57	1.68	80	28.34	male
25	M3	R2	Newton	1st TP	left	52.8	2023-09-25	2023-10-02	64.57	1.68	80	28.34	male
25	M3	R3	Newton	1st TP	left	49.2	2023-09-25	2023-10-02	64.57	1.68	80	28.34	male
26	M1	R1	Newton	1st MH	right	58.5	2023-09-25	2023-10-02	74.26	1.65	80	29.38	male
26	M1	R2	Newton	1st MH	right	54.1	2023-09-25	2023-10-02	74.26	1.65	80	29.38	male
26	M1	R3	Newton	1st MH	right	57.6	2023-09-25	2023-10-02	74.26	1.65	80	29.38	male
26	M1	R1	Newton	5th MH	right	61.6	2023-09-25	2023-10-02	74.26	1.65	80	29.38	male
26	M1	R2	Newton	5th MH	right	66	2023-09-25	2023-10-02	74.26	1.65	80	29.38	male
26	M1	R3	Newton	5th MH	right	71.2	2023-09-25	2023-10-02	74.26	1.65	80	29.38	male
26	M1	R1	Newton	Heel	right	106	2023-09-25	2023-10-02	74.26	1.65	80	29.38	male
26	M1	R2	Newton	Heel	right	106	2023-09-25	2023-10-02	74.26	1.65	80	29.38	male
26	M1	R3	Newton	Heel	right	110	2023-09-25	2023-10-02	74.26	1.65	80	29.38	male
26	M1	R1	Newton	1st TP	right	59.4	2023-09-25	2023-10-02	74.26	1.65	80	29.38	male
26	M1	R2	Newton	1st TP	right	58.9	2023-09-25	2023-10-02	74.26	1.65	80	29.38	male
26	M1	R3	Newton	1st TP	right	52.8	2023-09-25	2023-10-02	74.26	1.65	80	29.38	male
26	M1	R1	Newton	1st MH	left	68.2	2023-09-25	2023-10-02	74.26	1.65	80	29.38	male
26	M1	R2	Newton	1st MH	left	62	2023-09-25	2023-10-02	74.26	1.65	80	29.38	male
26	M1	R3	Newton	1st MH	left	69	2023-09-25	2023-10-02	74.26	1.65	80	29.38	male
26	M1	R1	Newton	5th MH	left	72.1	2023-09-25	2023-10-02	74.26	1.65	80	29.38	male
26	M1	R2	Newton	5th MH	left	75.2	2023-09-25	2023-10-02	74.26	1.65	80	29.38	male
26	M1	R3	Newton	5th MH	left	81.8	2023-09-25	2023-10-02	74.26	1.65	80	29.38	male
26	M1	R1	Newton	Heel	left	110	2023-09-25	2023-10-02	74.26	1.65	80	29.38	male
26	M1	R2	Newton	Heel	left	109	2023-09-25	2023-10-02	74.26	1.65	80	29.38	male
26	M1	R3	Newton	Heel	left	110	2023-09-25	2023-10-02	74.26	1.65	80	29.38	male
26	M1	R1	Newton	1st TP	left	61.1	2023-09-25	2023-10-02	74.26	1.65	80	29.38	male
26	M1	R2	Newton	1st TP	left	55.4	2023-09-25	2023-10-02	74.26	1.65	80	29.38	male
26	M1	R3	Newton	1st TP	left	51.4	2023-09-25	2023-10-02	74.26	1.65	80	29.38	male
26	M2	R1	Newton	1st MH	right	74.3	2023-09-25	2023-10-02	74.26	1.65	80	29.38	male
26	M2	R2	Newton	1st MH	right	69.5	2023-09-25	2023-10-02	74.26	1.65	80	29.38	male
26	M2	R3	Newton	1st MH	right	69.9	2023-09-25	2023-10-02	74.26	1.65	80	29.38	male
26	M2	R1	Newton	5th MH	right	70.4	2023-09-25	2023-10-02	74.26	1.65	80	29.38	male
26	M2	R2	Newton	5th MH	right	70.4	2023-09-25	2023-10-02	74.26	1.65	80	29.38	male
26	M2	R3	Newton	5th MH	right	70.8	2023-09-25	2023-10-02	74.26	1.65	80	29.38	male
26	M2	R1	Newton	Heel	right	108	2023-09-25	2023-10-02	74.26	1.65	80	29.38	male
26	M2	R2	Newton	Heel	right	99.4	2023-09-25	2023-10-02	74.26	1.65	80	29.38	male
26	M2	R3	Newton	Heel	right	102	2023-09-25	2023-10-02	74.26	1.65	80	29.38	male
26	M2	R1	Newton	1st TP	right	56.7	2023-09-25	2023-10-02	74.26	1.65	80	29.38	male
26	M2	R2	Newton	1st TP	right	59.4	2023-09-25	2023-10-02	74.26	1.65	80	29.38	male
26	M2	R3	Newton	1st TP	right	57.6	2023-09-25	2023-10-02	74.26	1.65	80	29.38	male
26	M2	R1	Newton	1st MH	left	63.8	2023-09-25	2023-10-02	74.26	1.65	80	29.38	male
26	M2	R2	Newton	1st MH	left	62.4	2023-09-25	2023-10-02	74.26	1.65	80	29.38	male
26	M2	R3	Newton	1st MH	left	71.2	2023-09-25	2023-10-02	74.26	1.65	80	29.38	male
26	M2	R1	Newton	5th MH	left	73	2023-09-25	2023-10-02	74.26	1.65	80	29.38	male
26	M2	R2	Newton	5th MH	left	71.7	2023-09-25	2023-10-02	74.26	1.65	80	29.38	male
26	M2	R3	Newton	5th MH	left	69	2023-09-25	2023-10-02	74.26	1.65	80	29.38	male
26	M2	R1	Newton	Heel	left	110	2023-09-25	2023-10-02	74.26	1.65	80	29.38	male
26	M2	R2	Newton	Heel	left	106	2023-09-25	2023-10-02	74.26	1.65	80	29.38	male
26	M2	R3	Newton	Heel	left	101	2023-09-25	2023-10-02	74.26	1.65	80	29.38	male
26	M2	R1	Newton	1st TP	left	61.1	2023-09-25	2023-10-02	74.26	1.65	80	29.38	male
26	M2	R2	Newton	1st TP	left	51.9	2023-09-25	2023-10-02	74.26	1.65	80	29.38	male
26	M2	R3	Newton	1st TP	left	54.1	2023-09-25	2023-10-02	74.26	1.65	80	29.38	male
26	M3	R1	Newton	1st MH	right	72.1	2023-09-25	2023-10-02	74.26	1.65	80	29.38	male
26	M3	R2	Newton	1st MH	right	70.4	2023-09-25	2023-10-02	74.26	1.65	80	29.38	male
26	M3	R3	Newton	1st MH	right	68.6	2023-09-25	2023-10-02	74.26	1.65	80	29.38	male
26	M3	R1	Newton	5th MH	right	95.5	2023-09-25	2023-10-02	74.26	1.65	80	29.38	male
26	M3	R2	Newton	5th MH	right	92.4	2023-09-25	2023-10-02	74.26	1.65	80	29.38	male
26	M3	R3	Newton	5th MH	right	69.9	2023-09-25	2023-10-02	74.26	1.65	80	29.38	male
26	M3	R1	Newton	Heel	right	110	2023-09-25	2023-10-02	74.26	1.65	80	29.38	male
26	M3	R2	Newton	Heel	right	108	2023-09-25	2023-10-02	74.26	1.65	80	29.38	male
26	M3	R3	Newton	Heel	right	110	2023-09-25	2023-10-02	74.26	1.65	80	29.38	male
26	M3	R1	Newton	1st TP	right	60.2	2023-09-25	2023-10-02	74.26	1.65	80	29.38	male
26	M3	R2	Newton	1st TP	right	49.7	2023-09-25	2023-10-02	74.26	1.65	80	29.38	male
26	M3	R3	Newton	1st TP	right	57.6	2023-09-25	2023-10-02	74.26	1.65	80	29.38	male
26	M3	R1	Newton	1st MH	left	75.6	2023-09-25	2023-10-02	74.26	1.65	80	29.38	male
26	M3	R2	Newton	1st MH	left	73.9	2023-09-25	2023-10-02	74.26	1.65	80	29.38	male
26	M3	R3	Newton	1st MH	left	72.6	2023-09-25	2023-10-02	74.26	1.65	80	29.38	male
26	M3	R1	Newton	5th MH	left	90.2	2023-09-25	2023-10-02	74.26	1.65	80	29.38	male
26	M3	R2	Newton	5th MH	left	88.8	2023-09-25	2023-10-02	74.26	1.65	80	29.38	male
26	M3	R3	Newton	5th MH	left	84.4	2023-09-25	2023-10-02	74.26	1.65	80	29.38	male
26	M3	R1	Newton	Heel	left	110	2023-09-25	2023-10-02	74.26	1.65	80	29.38	male
26	M3	R2	Newton	Heel	left	109	2023-09-25	2023-10-02	74.26	1.65	80	29.38	male
26	M3	R3	Newton	Heel	left	110	2023-09-25	2023-10-02	74.26	1.65	80	29.38	male
26	M3	R1	Newton	1st TP	left	63.8	2023-09-25	2023-10-02	74.26	1.65	80	29.38	male
26	M3	R2	Newton	1st TP	left	56.3	2023-09-25	2023-10-02	74.26	1.65	80	29.38	male
26	M3	R3	Newton	1st TP	left	53.6	2023-09-25	2023-10-02	74.26	1.65	80	29.38	male
27	M1	R1	Newton	1st MH	right	84.9	2023-09-25	2023-10-02	70.3	1.7	92	31.83	male
27	M1	R2	Newton	1st MH	right	85.8	2023-09-25	2023-10-02	70.3	1.7	92	31.83	male
27	M1	R3	Newton	1st MH	right	80.9	2023-09-25	2023-10-02	70.3	1.7	92	31.83	male
27	M1	R1	Newton	5th MH	right	110	2023-09-25	2023-10-02	70.3	1.7	92	31.83	male
27	M1	R2	Newton	5th MH	right	103	2023-09-25	2023-10-02	70.3	1.7	92	31.83	male
27	M1	R3	Newton	5th MH	right	93.2	2023-09-25	2023-10-02	70.3	1.7	92	31.83	male
27	M1	R1	Newton	Heel	right	83.1	2023-09-25	2023-10-02	70.3	1.7	92	31.83	male
27	M1	R2	Newton	Heel	right	87.5	2023-09-25	2023-10-02	70.3	1.7	92	31.83	male
27	M1	R3	Newton	Heel	right	100	2023-09-25	2023-10-02	70.3	1.7	92	31.83	male
27	M1	R1	Newton	1st TP	right	56.7	2023-09-25	2023-10-02	70.3	1.7	92	31.83	male
27	M1	R2	Newton	1st TP	right	53.6	2023-09-25	2023-10-02	70.3	1.7	92	31.83	male
27	M1	R3	Newton	1st TP	right	50.1	2023-09-25	2023-10-02	70.3	1.7	92	31.83	male
27	M1	R1	Newton	1st MH	left	85.8	2023-09-25	2023-10-02	70.3	1.7	92	31.83	male
27	M1	R2	Newton	1st MH	left	95	2023-09-25	2023-10-02	70.3	1.7	92	31.83	male
27	M1	R3	Newton	1st MH	left	93.2	2023-09-25	2023-10-02	70.3	1.7	92	31.83	male
27	M1	R1	Newton	5th MH	left	96.8	2023-09-25	2023-10-02	70.3	1.7	92	31.83	male
27	M1	R2	Newton	5th MH	left	91	2023-09-25	2023-10-02	70.3	1.7	92	31.83	male
27	M1	R3	Newton	5th MH	left	98.1	2023-09-25	2023-10-02	70.3	1.7	92	31.83	male
27	M1	R1	Newton	Heel	left	73.6	2023-09-25	2023-10-02	70.3	1.7	92	31.83	male
27	M1	R2	Newton	Heel	left	92.4	2023-09-25	2023-10-02	70.3	1.7	92	31.83	male
27	M1	R3	Newton	Heel	left	97.6	2023-09-25	2023-10-02	70.3	1.7	92	31.83	male
27	M1	R1	Newton	1st TP	left	58.5	2023-09-25	2023-10-02	70.3	1.7	92	31.83	male
27	M1	R2	Newton	1st TP	left	54.5	2023-09-25	2023-10-02	70.3	1.7	92	31.83	male
27	M1	R3	Newton	1st TP	left	51.4	2023-09-25	2023-10-02	70.3	1.7	92	31.83	male
27	M2	R1	Newton	1st MH	right	66	2023-09-25	2023-10-02	70.3	1.7	92	31.83	male
27	M2	R2	Newton	1st MH	right	73.9	2023-09-25	2023-10-02	70.3	1.7	92	31.83	male
27	M2	R3	Newton	1st MH	right	80.9	2023-09-25	2023-10-02	70.3	1.7	92	31.83	male
27	M2	R1	Newton	5th MH	right	90.2	2023-09-25	2023-10-02	70.3	1.7	92	31.83	male
27	M2	R2	Newton	5th MH	right	89.3	2023-09-25	2023-10-02	70.3	1.7	92	31.83	male
27	M2	R3	Newton	5th MH	right	88.4	2023-09-25	2023-10-02	70.3	1.7	92	31.83	male
27	M2	R1	Newton	Heel	right	91.9	2023-09-25	2023-10-02	70.3	1.7	92	31.83	male
27	M2	R2	Newton	Heel	right	80.9	2023-09-25	2023-10-02	70.3	1.7	92	31.83	male
27	M2	R3	Newton	Heel	right	85.3	2023-09-25	2023-10-02	70.3	1.7	92	31.83	male
27	M2	R1	Newton	1st TP	right	50.1	2023-09-25	2023-10-02	70.3	1.7	92	31.83	male
27	M2	R2	Newton	1st TP	right	54.5	2023-09-25	2023-10-02	70.3	1.7	92	31.83	male
27	M2	R3	Newton	1st TP	right	52.3	2023-09-25	2023-10-02	70.3	1.7	92	31.83	male
27	M2	R1	Newton	1st MH	left	74.3	2023-09-25	2023-10-02	70.3	1.7	92	31.83	male
27	M2	R2	Newton	1st MH	left	78.7	2023-09-25	2023-10-02	70.3	1.7	92	31.83	male
27	M2	R3	Newton	1st MH	left	83.6	2023-09-25	2023-10-02	70.3	1.7	92	31.83	male
27	M2	R1	Newton	5th MH	left	81.4	2023-09-25	2023-10-02	70.3	1.7	92	31.83	male
27	M2	R2	Newton	5th MH	left	86.2	2023-09-25	2023-10-02	70.3	1.7	92	31.83	male
27	M2	R3	Newton	5th MH	left	91.9	2023-09-25	2023-10-02	70.3	1.7	92	31.83	male
27	M2	R1	Newton	Heel	left	91	2023-09-25	2023-10-02	70.3	1.7	92	31.83	male
27	M2	R2	Newton	Heel	left	86.2	2023-09-25	2023-10-02	70.3	1.7	92	31.83	male
27	M2	R3	Newton	Heel	left	88.4	2023-09-25	2023-10-02	70.3	1.7	92	31.83	male
27	M2	R1	Newton	1st TP	left	51.4	2023-09-25	2023-10-02	70.3	1.7	92	31.83	male
27	M2	R2	Newton	1st TP	left	52.8	2023-09-25	2023-10-02	70.3	1.7	92	31.83	male
27	M2	R3	Newton	1st TP	left	51.9	2023-09-25	2023-10-02	70.3	1.7	92	31.83	male
27	M3	R1	Newton	1st MH	right	52.3	2023-09-25	2023-10-02	70.3	1.7	92	31.83	male
27	M3	R2	Newton	1st MH	right	73.9	2023-09-25	2023-10-02	70.3	1.7	92	31.83	male
27	M3	R3	Newton	1st MH	right	80.9	2023-09-25	2023-10-02	70.3	1.7	92	31.83	male
27	M3	R1	Newton	5th MH	right	72.1	2023-09-25	2023-10-02	70.3	1.7	92	31.83	male
27	M3	R2	Newton	5th MH	right	81.8	2023-09-25	2023-10-02	70.3	1.7	92	31.83	male
27	M3	R3	Newton	5th MH	right	75.6	2023-09-25	2023-10-02	70.3	1.7	92	31.83	male
27	M3	R1	Newton	Heel	right	91.5	2023-09-25	2023-10-02	70.3	1.7	92	31.83	male
27	M3	R2	Newton	Heel	right	73.4	2023-09-25	2023-10-02	70.3	1.7	92	31.83	male
27	M3	R3	Newton	Heel	right	85.8	2023-09-25	2023-10-02	70.3	1.7	92	31.83	male
27	M3	R1	Newton	1st TP	right	47.9	2023-09-25	2023-10-02	70.3	1.7	92	31.83	male
27	M3	R2	Newton	1st TP	right	48.8	2023-09-25	2023-10-02	70.3	1.7	92	31.83	male
27	M3	R3	Newton	1st TP	right	51	2023-09-25	2023-10-02	70.3	1.7	92	31.83	male
27	M3	R1	Newton	1st MH	left	74.8	2023-09-25	2023-10-02	70.3	1.7	92	31.83	male
27	M3	R2	Newton	1st MH	left	68.2	2023-09-25	2023-10-02	70.3	1.7	92	31.83	male
27	M3	R3	Newton	1st MH	left	72.1	2023-09-25	2023-10-02	70.3	1.7	92	31.83	male
27	M3	R1	Newton	5th MH	left	72.6	2023-09-25	2023-10-02	70.3	1.7	92	31.83	male
27	M3	R2	Newton	5th MH	left	80	2023-09-25	2023-10-02	70.3	1.7	92	31.83	male
27	M3	R3	Newton	5th MH	left	74.8	2023-09-25	2023-10-02	70.3	1.7	92	31.83	male
27	M3	R1	Newton	Heel	left	69	2023-09-25	2023-10-02	70.3	1.7	92	31.83	male
27	M3	R2	Newton	Heel	left	71.7	2023-09-25	2023-10-02	70.3	1.7	92	31.83	male
27	M3	R3	Newton	Heel	left	67.7	2023-09-25	2023-10-02	70.3	1.7	92	31.83	male
27	M3	R1	Newton	1st TP	left	45.3	2023-09-25	2023-10-02	70.3	1.7	92	31.83	male
27	M3	R2	Newton	1st TP	left	52.8	2023-09-25	2023-10-02	70.3	1.7	92	31.83	male
27	M3	R3	Newton	1st TP	left	50.6	2023-09-25	2023-10-02	70.3	1.7	92	31.83	male
28	M1	R1	Newton	1st MH	right	56.7	2023-09-25	2023-10-02	70.55	1.55	70	29.14	female
28	M1	R2	Newton	1st MH	right	55.4	2023-09-25	2023-10-02	70.55	1.55	70	29.14	female
28	M1	R3	Newton	1st MH	right	56.3	2023-09-25	2023-10-02	70.55	1.55	70	29.14	female
28	M1	R1	Newton	5th MH	right	62	2023-09-25	2023-10-02	70.55	1.55	70	29.14	female
28	M1	R2	Newton	5th MH	right	65.5	2023-09-25	2023-10-02	70.55	1.55	70	29.14	female
28	M1	R3	Newton	5th MH	right	63.8	2023-09-25	2023-10-02	70.55	1.55	70	29.14	female
28	M1	R1	Newton	Heel	right	76.5	2023-09-25	2023-10-02	70.55	1.55	70	29.14	female
28	M1	R2	Newton	Heel	right	68.2	2023-09-25	2023-10-02	70.55	1.55	70	29.14	female
28	M1	R3	Newton	Heel	right	66	2023-09-25	2023-10-02	70.55	1.55	70	29.14	female
28	M1	R1	Newton	1st TP	right	29	2023-09-25	2023-10-02	70.55	1.55	70	29.14	female
28	M1	R2	Newton	1st TP	right	32.5	2023-09-25	2023-10-02	70.55	1.55	70	29.14	female
28	M1	R3	Newton	1st TP	right	33.8	2023-09-25	2023-10-02	70.55	1.55	70	29.14	female
28	M1	R1	Newton	1st MH	left	57.2	2023-09-25	2023-10-02	70.55	1.55	70	29.14	female
28	M1	R2	Newton	1st MH	left	61.6	2023-09-25	2023-10-02	70.55	1.55	70	29.14	female
28	M1	R3	Newton	1st MH	left	55.8	2023-09-25	2023-10-02	70.55	1.55	70	29.14	female
28	M1	R1	Newton	5th MH	left	69.5	2023-09-25	2023-10-02	70.55	1.55	70	29.14	female
28	M1	R2	Newton	5th MH	left	69.5	2023-09-25	2023-10-02	70.55	1.55	70	29.14	female
28	M1	R3	Newton	5th MH	left	71.2	2023-09-25	2023-10-02	70.55	1.55	70	29.14	female
28	M1	R1	Newton	Heel	left	70.4	2023-09-25	2023-10-02	70.55	1.55	70	29.14	female
28	M1	R2	Newton	Heel	left	66	2023-09-25	2023-10-02	70.55	1.55	70	29.14	female
28	M1	R3	Newton	Heel	left	69	2023-09-25	2023-10-02	70.55	1.55	70	29.14	female
28	M1	R1	Newton	1st TP	left	29.4	2023-09-25	2023-10-02	70.55	1.55	70	29.14	female
28	M1	R2	Newton	1st TP	left	28.6	2023-09-25	2023-10-02	70.55	1.55	70	29.14	female
28	M1	R3	Newton	1st TP	left	29.9	2023-09-25	2023-10-02	70.55	1.55	70	29.14	female
28	M2	R1	Newton	1st MH	right	44.4	2023-09-25	2023-10-02	70.55	1.55	70	29.14	female
28	M2	R2	Newton	1st MH	right	53.2	2023-09-25	2023-10-02	70.55	1.55	70	29.14	female
28	M2	R3	Newton	1st MH	right	55	2023-09-25	2023-10-02	70.55	1.55	70	29.14	female
28	M2	R1	Newton	5th MH	right	67.3	2023-09-25	2023-10-02	70.55	1.55	70	29.14	female
28	M2	R2	Newton	5th MH	right	56.7	2023-09-25	2023-10-02	70.55	1.55	70	29.14	female
28	M2	R3	Newton	5th MH	right	66.8	2023-09-25	2023-10-02	70.55	1.55	70	29.14	female
28	M2	R1	Newton	Heel	right	70.4	2023-09-25	2023-10-02	70.55	1.55	70	29.14	female
28	M2	R2	Newton	Heel	right	63.8	2023-09-25	2023-10-02	70.55	1.55	70	29.14	female
28	M2	R3	Newton	Heel	right	63.8	2023-09-25	2023-10-02	70.55	1.55	70	29.14	female
28	M2	R1	Newton	1st TP	right	34.7	2023-09-25	2023-10-02	70.55	1.55	70	29.14	female
28	M2	R2	Newton	1st TP	right	34.3	2023-09-25	2023-10-02	70.55	1.55	70	29.14	female
28	M2	R3	Newton	1st TP	right	36.5	2023-09-25	2023-10-02	70.55	1.55	70	29.14	female
28	M2	R1	Newton	1st MH	left	51.4	2023-09-25	2023-10-02	70.55	1.55	70	29.14	female
28	M2	R2	Newton	1st MH	left	54.1	2023-09-25	2023-10-02	70.55	1.55	70	29.14	female
28	M2	R3	Newton	1st MH	left	46.2	2023-09-25	2023-10-02	70.55	1.55	70	29.14	female
28	M2	R1	Newton	5th MH	left	60.2	2023-09-25	2023-10-02	70.55	1.55	70	29.14	female
28	M2	R2	Newton	5th MH	left	66.8	2023-09-25	2023-10-02	70.55	1.55	70	29.14	female
28	M2	R3	Newton	5th MH	left	66.8	2023-09-25	2023-10-02	70.55	1.55	70	29.14	female
28	M2	R1	Newton	Heel	left	61.6	2023-09-25	2023-10-02	70.55	1.55	70	29.14	female
28	M2	R2	Newton	Heel	left	59.4	2023-09-25	2023-10-02	70.55	1.55	70	29.14	female
28	M2	R3	Newton	Heel	left	60.2	2023-09-25	2023-10-02	70.55	1.55	70	29.14	female
28	M2	R1	Newton	1st TP	left	33	2023-09-25	2023-10-02	70.55	1.55	70	29.14	female
28	M2	R2	Newton	1st TP	left	34.3	2023-09-25	2023-10-02	70.55	1.55	70	29.14	female
28	M2	R3	Newton	1st TP	left	33.8	2023-09-25	2023-10-02	70.55	1.55	70	29.14	female
28	M3	R1	Newton	1st MH	right	43.5	2023-09-25	2023-10-02	70.55	1.55	70	29.14	female
28	M3	R2	Newton	1st MH	right	47	2023-09-25	2023-10-02	70.55	1.55	70	29.14	female
28	M3	R3	Newton	1st MH	right	46.6	2023-09-25	2023-10-02	70.55	1.55	70	29.14	female
28	M3	R1	Newton	5th MH	right	35.6	2023-09-25	2023-10-02	70.55	1.55	70	29.14	female
28	M3	R2	Newton	5th MH	right	55	2023-09-25	2023-10-02	70.55	1.55	70	29.14	female
28	M3	R3	Newton	5th MH	right	50.1	2023-09-25	2023-10-02	70.55	1.55	70	29.14	female
28	M3	R1	Newton	Heel	right	69.9	2023-09-25	2023-10-02	70.55	1.55	70	29.14	female
28	M3	R2	Newton	Heel	right	70.8	2023-09-25	2023-10-02	70.55	1.55	70	29.14	female
28	M3	R3	Newton	Heel	right	72.6	2023-09-25	2023-10-02	70.55	1.55	70	29.14	female
28	M3	R1	Newton	1st TP	right	36.9	2023-09-25	2023-10-02	70.55	1.55	70	29.14	female
28	M3	R2	Newton	1st TP	right	36.5	2023-09-25	2023-10-02	70.55	1.55	70	29.14	female
28	M3	R3	Newton	1st TP	right	36	2023-09-25	2023-10-02	70.55	1.55	70	29.14	female
28	M3	R1	Newton	1st MH	left	44.4	2023-09-25	2023-10-02	70.55	1.55	70	29.14	female
28	M3	R2	Newton	1st MH	left	49.7	2023-09-25	2023-10-02	70.55	1.55	70	29.14	female
28	M3	R3	Newton	1st MH	left	49.2	2023-09-25	2023-10-02	70.55	1.55	70	29.14	female
28	M3	R1	Newton	5th MH	left	54.5	2023-09-25	2023-10-02	70.55	1.55	70	29.14	female
28	M3	R2	Newton	5th MH	left	54.1	2023-09-25	2023-10-02	70.55	1.55	70	29.14	female
28	M3	R3	Newton	5th MH	left	50.6	2023-09-25	2023-10-02	70.55	1.55	70	29.14	female
28	M3	R1	Newton	Heel	left	72.1	2023-09-25	2023-10-02	70.55	1.55	70	29.14	female
28	M3	R2	Newton	Heel	left	65.1	2023-09-25	2023-10-02	70.55	1.55	70	29.14	female
28	M3	R3	Newton	Heel	left	73.9	2023-09-25	2023-10-02	70.55	1.55	70	29.14	female
28	M3	R1	Newton	1st TP	left	29	2023-09-25	2023-10-02	70.55	1.55	70	29.14	female
28	M3	R2	Newton	1st TP	left	40.4	2023-09-25	2023-10-02	70.55	1.55	70	29.14	female
28	M3	R3	Newton	1st TP	left	40.9	2023-09-25	2023-10-02	70.55	1.55	70	29.14	female
29	M1	R1	Newton	1st MH	right	81.8	2023-09-26	2023-10-03	64.1	1.62	88	33.53	female
29	M1	R2	Newton	1st MH	right	81.8	2023-09-26	2023-10-03	64.1	1.62	88	33.53	female
29	M1	R3	Newton	1st MH	right	79.6	2023-09-26	2023-10-03	64.1	1.62	88	33.53	female
29	M1	R1	Newton	5th MH	right	87.1	2023-09-26	2023-10-03	64.1	1.62	88	33.53	female
29	M1	R2	Newton	5th MH	right	78.3	2023-09-26	2023-10-03	64.1	1.62	88	33.53	female
29	M1	R3	Newton	5th MH	right	87.1	2023-09-26	2023-10-03	64.1	1.62	88	33.53	female
29	M1	R1	Newton	Heel	right	105	2023-09-26	2023-10-03	64.1	1.62	88	33.53	female
29	M1	R2	Newton	Heel	right	102	2023-09-26	2023-10-03	64.1	1.62	88	33.53	female
29	M1	R3	Newton	Heel	right	110	2023-09-26	2023-10-03	64.1	1.62	88	33.53	female
29	M1	R1	Newton	1st TP	right	32.5	2023-09-26	2023-10-03	64.1	1.62	88	33.53	female
29	M1	R2	Newton	1st TP	right	35.6	2023-09-26	2023-10-03	64.1	1.62	88	33.53	female
29	M1	R3	Newton	1st TP	right	33.4	2023-09-26	2023-10-03	64.1	1.62	88	33.53	female
29	M1	R1	Newton	1st MH	left	91	2023-09-26	2023-10-03	64.1	1.62	88	33.53	female
29	M1	R2	Newton	1st MH	left	91.5	2023-09-26	2023-10-03	64.1	1.62	88	33.53	female
29	M1	R3	Newton	1st MH	left	90.6	2023-09-26	2023-10-03	64.1	1.62	88	33.53	female
29	M1	R1	Newton	5th MH	left	86.6	2023-09-26	2023-10-03	64.1	1.62	88	33.53	female
29	M1	R2	Newton	5th MH	left	84	2023-09-26	2023-10-03	64.1	1.62	88	33.53	female
29	M1	R3	Newton	5th MH	left	90.6	2023-09-26	2023-10-03	64.1	1.62	88	33.53	female
29	M1	R1	Newton	Heel	left	110	2023-09-26	2023-10-03	64.1	1.62	88	33.53	female
29	M1	R2	Newton	Heel	left	110	2023-09-26	2023-10-03	64.1	1.62	88	33.53	female
29	M1	R3	Newton	Heel	left	110	2023-09-26	2023-10-03	64.1	1.62	88	33.53	female
29	M1	R1	Newton	1st TP	left	38.2	2023-09-26	2023-10-03	64.1	1.62	88	33.53	female
29	M1	R2	Newton	1st TP	left	33.8	2023-09-26	2023-10-03	64.1	1.62	88	33.53	female
29	M1	R3	Newton	1st TP	left	32.1	2023-09-26	2023-10-03	64.1	1.62	88	33.53	female
29	M2	R1	Newton	1st MH	right	71.7	2023-09-26	2023-10-03	64.1	1.62	88	33.53	female
29	M2	R2	Newton	1st MH	right	82.7	2023-09-26	2023-10-03	64.1	1.62	88	33.53	female
29	M2	R3	Newton	1st MH	right	84.9	2023-09-26	2023-10-03	64.1	1.62	88	33.53	female
29	M2	R1	Newton	5th MH	right	83.6	2023-09-26	2023-10-03	64.1	1.62	88	33.53	female
29	M2	R2	Newton	5th MH	right	82.2	2023-09-26	2023-10-03	64.1	1.62	88	33.53	female
29	M2	R3	Newton	5th MH	right	81.8	2023-09-26	2023-10-03	64.1	1.62	88	33.53	female
29	M2	R1	Newton	Heel	right	110	2023-09-26	2023-10-03	64.1	1.62	88	33.53	female
29	M2	R2	Newton	Heel	right	110	2023-09-26	2023-10-03	64.1	1.62	88	33.53	female
29	M2	R3	Newton	Heel	right	110	2023-09-26	2023-10-03	64.1	1.62	88	33.53	female
29	M2	R1	Newton	1st TP	right	41.3	2023-09-26	2023-10-03	64.1	1.62	88	33.53	female
29	M2	R2	Newton	1st TP	right	43.5	2023-09-26	2023-10-03	64.1	1.62	88	33.53	female
29	M2	R3	Newton	1st TP	right	44	2023-09-26	2023-10-03	64.1	1.62	88	33.53	female
29	M2	R1	Newton	1st MH	left	76.1	2023-09-26	2023-10-03	64.1	1.62	88	33.53	female
29	M2	R2	Newton	1st MH	left	77.8	2023-09-26	2023-10-03	64.1	1.62	88	33.53	female
29	M2	R3	Newton	1st MH	left	82.2	2023-09-26	2023-10-03	64.1	1.62	88	33.53	female
29	M2	R1	Newton	5th MH	left	87.5	2023-09-26	2023-10-03	64.1	1.62	88	33.53	female
29	M2	R2	Newton	5th MH	left	77	2023-09-26	2023-10-03	64.1	1.62	88	33.53	female
29	M2	R3	Newton	5th MH	left	88.8	2023-09-26	2023-10-03	64.1	1.62	88	33.53	female
29	M2	R1	Newton	Heel	left	101	2023-09-26	2023-10-03	64.1	1.62	88	33.53	female
29	M2	R2	Newton	Heel	left	101	2023-09-26	2023-10-03	64.1	1.62	88	33.53	female
29	M2	R3	Newton	Heel	left	107	2023-09-26	2023-10-03	64.1	1.62	88	33.53	female
29	M2	R1	Newton	1st TP	left	34.3	2023-09-26	2023-10-03	64.1	1.62	88	33.53	female
29	M2	R2	Newton	1st TP	left	40	2023-09-26	2023-10-03	64.1	1.62	88	33.53	female
29	M2	R3	Newton	1st TP	left	34.7	2023-09-26	2023-10-03	64.1	1.62	88	33.53	female
29	M3	R1	Newton	1st MH	right	58	2023-09-26	2023-10-03	64.1	1.62	88	33.53	female
29	M3	R2	Newton	1st MH	right	64.2	2023-09-26	2023-10-03	64.1	1.62	88	33.53	female
29	M3	R3	Newton	1st MH	right	76.1	2023-09-26	2023-10-03	64.1	1.62	88	33.53	female
29	M3	R1	Newton	5th MH	right	71.2	2023-09-26	2023-10-03	64.1	1.62	88	33.53	female
29	M3	R2	Newton	5th MH	right	72.6	2023-09-26	2023-10-03	64.1	1.62	88	33.53	female
29	M3	R3	Newton	5th MH	right	68.6	2023-09-26	2023-10-03	64.1	1.62	88	33.53	female
29	M3	R1	Newton	Heel	right	102	2023-09-26	2023-10-03	64.1	1.62	88	33.53	female
[truncated: 233 more rows]
